# Supplementary material for: Effective synthesis of novel dihydrobenzisoxazoles bearing the 2-aminothiazole moiety and evaluation of the antiproliferative activity of their acylated derivatives
Source: Royal Society of Chemistry journal article supplement (doi:10.1039/d1ob01614h), 2021-01-01
Supplement: d1ob01614h1.pdf [file d1ob01614h1.pdf]

## SUPPLEMENTARY INFORMATION

### Effective synthesis of novel dihydrobenzoxazoles bearing the 2-aminothiazole moiety and evaluation of the antiproliferative activity of their acylated derivatives

Yuri A. Piven<sup>a</sup>, Alexander M. Scherbakov<sup>b</sup>, Margarita A. Yastrebova<sup>c</sup>, Danila V. Sorokin<sup>b</sup>, Yuri Yu. Shchegolev<sup>b</sup>, Anton E. Matous<sup>a</sup>, Veronica G. Zinovich<sup>a</sup>, Tatyana S. Khlebnicova<sup>a</sup>, Fedor A. Lakhvich<sup>a</sup>

<sup>a</sup>Institute of Bioorganic Chemistry, National Academy of Sciences of Belarus, Akad. Kuprevicha st. 5/2, Minsk 220141, Belarus

<sup>b</sup>Department of Experimental Tumor Biology, Blokhin N.N. National Medical Research Center of Oncology, Kashirskoye sh. 24, Moscow 115522, Russian Federation

<sup>c</sup>Institute of Gene Biology, Russian Academy of Sciences, Vavilova st. 34/5, Moscow 119334, Russian Federation

#### Table of content

|                                                                           |     |
|---------------------------------------------------------------------------|-----|
| Synthesis of compound <b>5d</b> .....                                     | S2  |
| Copies of NMR spectra .....                                               | S3  |
| HPLC chromatograms of compounds <b>8b</b> , <b>8c</b> and <b>8q</b> ..... | S71 |
| Western blots.....                                                        | S72 |
| References.....                                                           | S75 |

## Synthesis of compound 5d

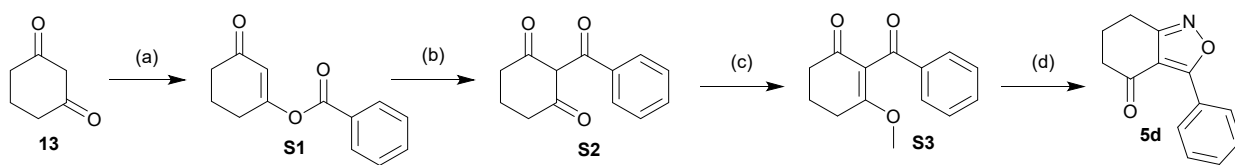

Scheme S1. Synthesis of compound 5d. Reagents and conditions: (a) benzoyl chloride, Py, CHCl<sub>3</sub>, r.t., 1 h, 94%; (b) acetone cyanohydrin, Et<sub>3</sub>N, CH<sub>3</sub>CN, r.t., 3 h, 91%; (c) (CH<sub>3</sub>)<sub>2</sub>SO<sub>4</sub>, K<sub>2</sub>CO<sub>3</sub>, CH<sub>3</sub>CN, reflux, 0.5 h, 80%; (d) NH<sub>2</sub>OH·HCl, NaOH, MeOH, r.t., 3 h, 89%.

**3-Oxocyclohex-1-en-1-yl benzoate S1** was prepared according to the method described in the work<sup>1</sup>. Yield 94%. Light yellow oil (lit.<sup>1</sup> oil). <sup>1</sup>H NMR(Chloroform-*d*, 500 MHz): δ (ppm) 8.07 (dd, *J*=8.3, 1.4 Hz, 2H), 7.67 – 7.60 (m, 1H), 7.53 – 7.46 (m, 2H), 6.04 (t, *J*=1.3 Hz, 1H), 2.71 – 2.63 (m, 2H), 2.49 – 2.42 (m, 2H), 2.12 (p, *J*=6.4 Hz, 2H). <sup>13</sup>C NMR(Chloroform-*d*, 126 MHz): δ (ppm) 199.60, 170.30, 163.29, 134.22, 130.33, 128.82, 128.74, 117.98, 36.90, 28.54, 21.46.

**2-Benzoylcyclohexane-1,3-dione S2** was prepared according to the method described for the synthesis of analogous compounds in the work<sup>2</sup>. Yield 87%. Light yellow oil (lit. m.p.<sup>1</sup> 55-58 °C). <sup>1</sup>H NMR(Chloroform-*d*, 500 MHz): δ (ppm) 16.96 (s, 1H), 7.55 – 7.47 (m, 3H), 7.43 – 7.36 (m, 2H), 2.75 (t, *J*=6.3 Hz, 2H), 2.50 (t, *J*=6.6 Hz, 2H), 2.07 (p, *J*=6.5 Hz, 2H). <sup>13</sup>C NMR(Chloroform-*d*, 126 MHz): δ (ppm) 199.14, 196.39, 194.34, 138.30, 132.04, 128.40, 127.84, 113.39, 38.27, 32.57, 19.27.

**2-Benzoyl-3-methoxycyclohex-2-en-1-one S3** was prepared according to the method described for the synthesis of compound 16 (see experimental part of this article). Yield 80%. M.p. 160-164 °C. <sup>1</sup>H NMR(Chloroform-*d*, 500 MHz): δ (ppm) 7.91 – 7.80 (m, 2H), 7.55 – 7.50 (m, 1H), 7.45 – 7.40 (m, 2H), 3.72 (s, 3H), 2.68 (t, *J*=6.2 Hz, 2H), 2.46 (t, *J*=6.7 Hz, 2H), 2.14 (p, *J*=6.5 Hz, 2H). <sup>13</sup>C NMR(Chloroform-*d*, 126 MHz): δ (ppm) 196.58, 195.43, 174.87, 137.49, 133.40, 129.26, 128.64, 119.94, 56.72, 36.53, 26.01, 20.70.

**3-Phenyl-6,7-dihydrobenzo[*c*]isoxazol-4(5*H*)-one 5d** was prepared according to the method described for the synthesis of compound 5e (see experimental part of this article). Yield 92%, mp 58-62 °C (lit.<sup>3</sup> 65-67.5 °C). <sup>1</sup>H NMR(Chloroform-*d*, 500 MHz): δ (ppm) 8.50 – 8.36 (m, 2H), 7.59 – 7.46 (m, 3H), 3.03 – 2.95 (m, 2H), 2.67 – 2.58 (m, 2H), 2.17 (p, *J*=6.5 Hz, 2H). <sup>13</sup>C NMR(Chloroform-*d*, 126 MHz): δ (ppm) 192.59, 170.82, 165.02, 132.44, 128.83, 126.47, 112.49, 40.20, 22.38, 21.98.

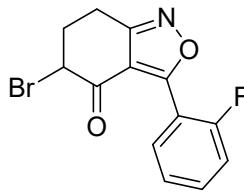

5-bromo-3-(2-fluorophenyl)-6,7-dihydrobenzo[c]isoxazol-4(5H)-one

Chemical Formula: C<sub>13</sub>H<sub>9</sub>BrFNO<sub>2</sub>

Exact Mass: 308,9801

Molecular Weight: 310,1224

### 6a

<sup>1</sup>H spectra of **6a**:

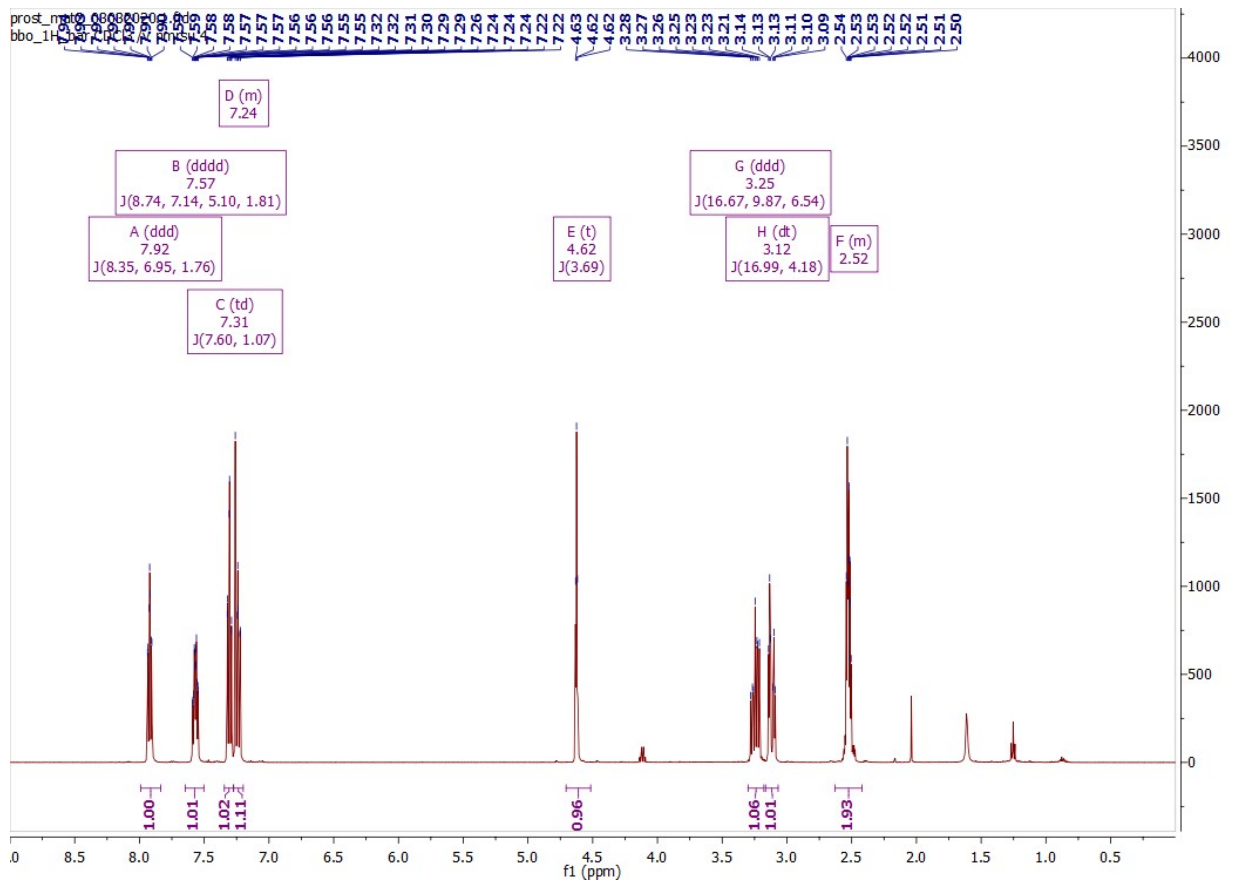

### $^{13}\text{C}$ spectra of **6a**:

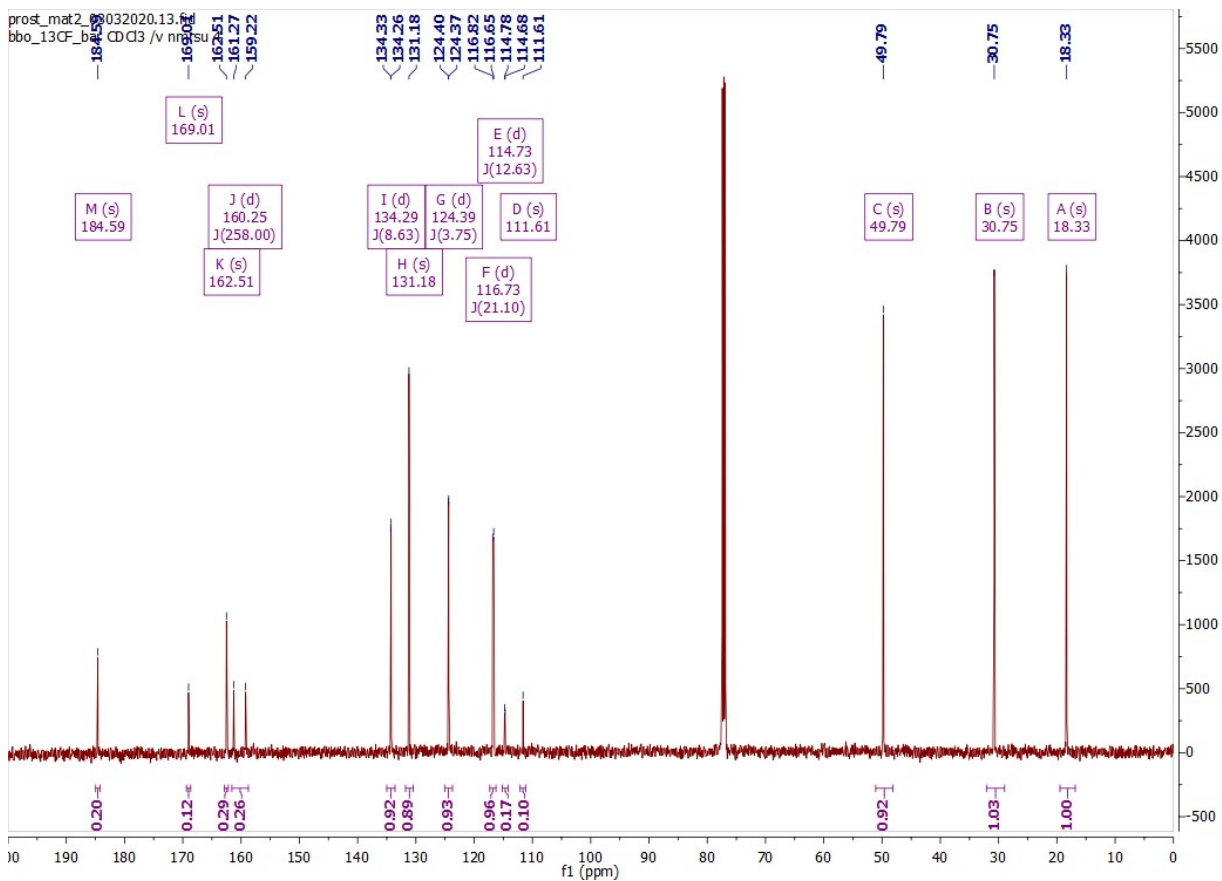

### $^{19}\text{F}$ spectra of **6a**:

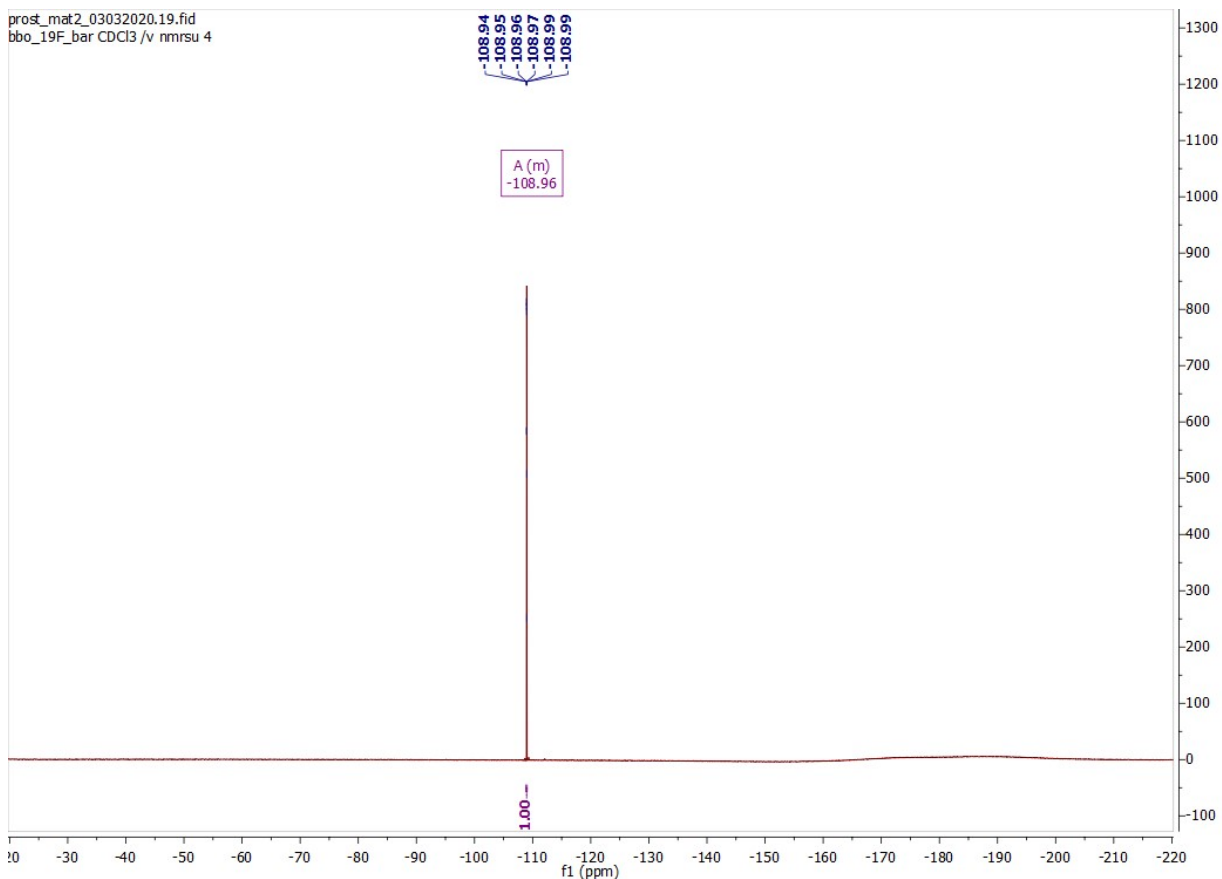

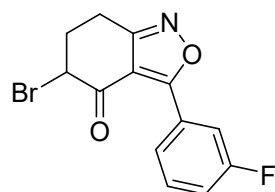

5-bromo-3-(3-fluorophenyl)-6,7-dihydrobenzo[c]isoxazol-4(5H)-one

Chemical Formula: C<sub>13</sub>H<sub>9</sub>BrFNO<sub>2</sub>

Exact Mass: 308,9801

Molecular Weight: 310,1224

**6b**

<sup>1</sup>H spectra of **6b**:

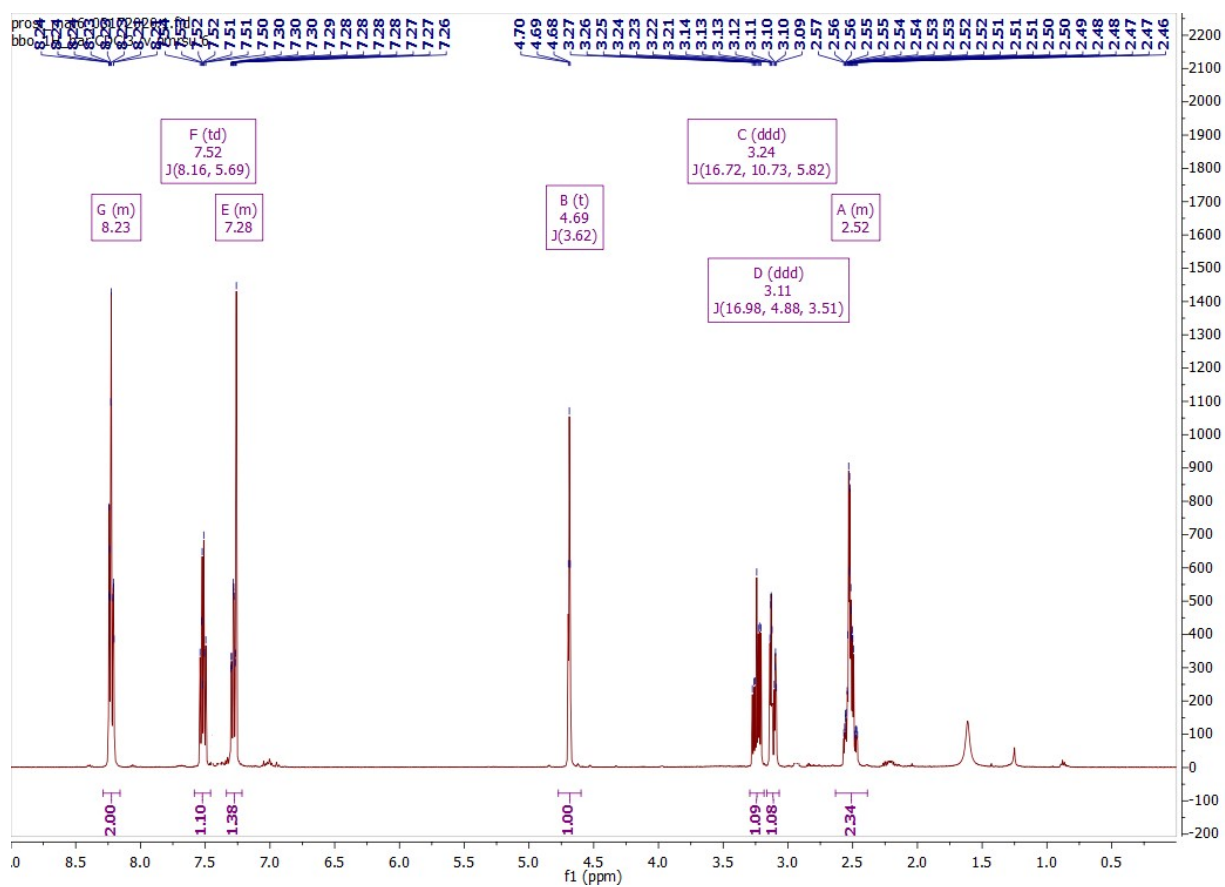

<sup>13</sup>C spectra of **6b**:

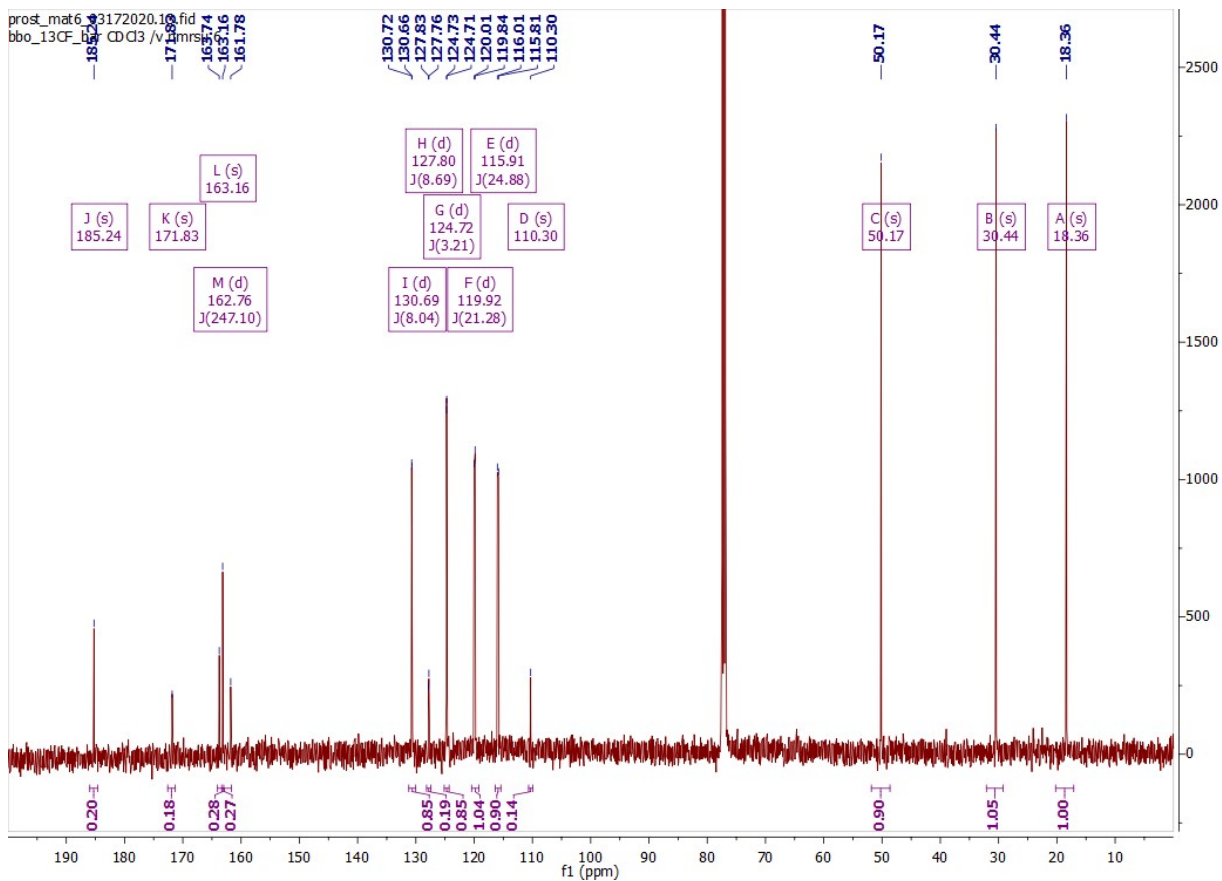

<sup>19</sup>F spectra of **6b**:

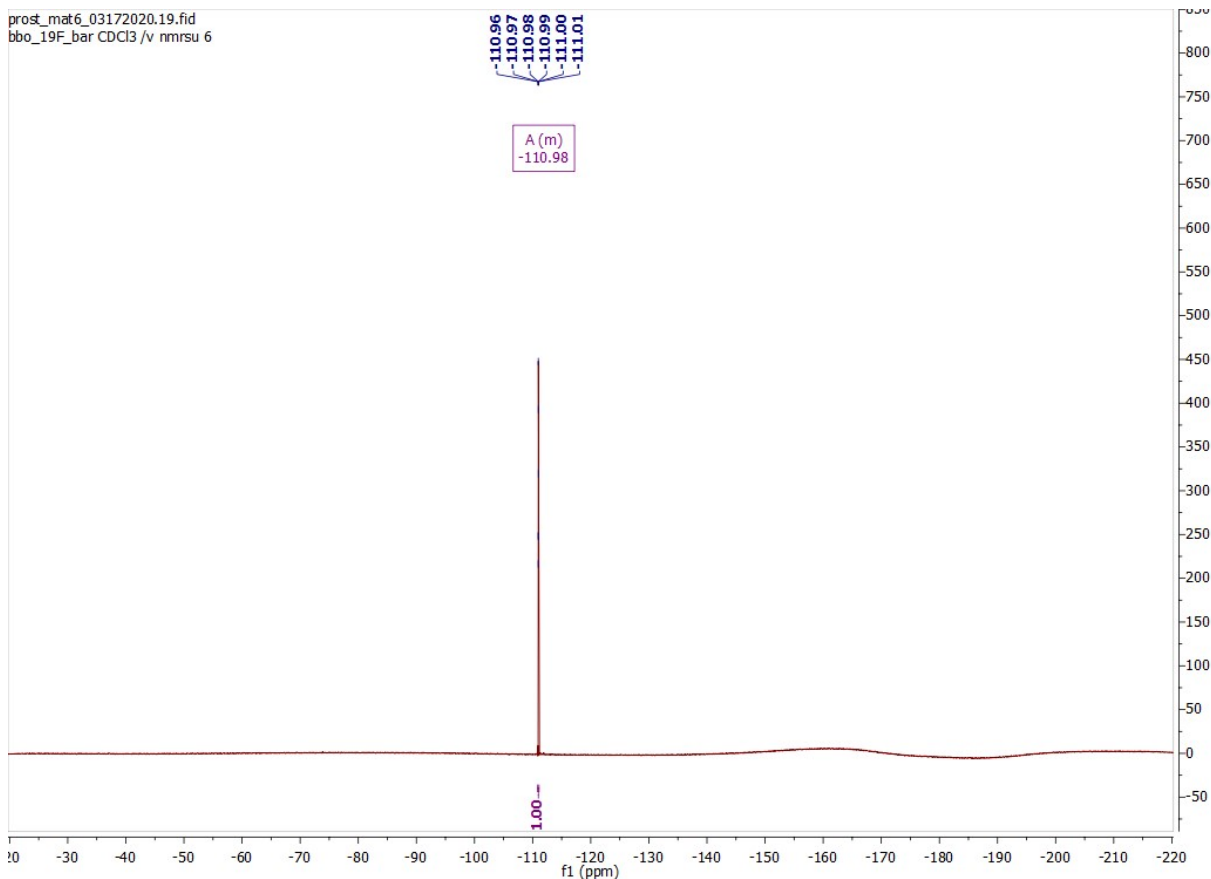

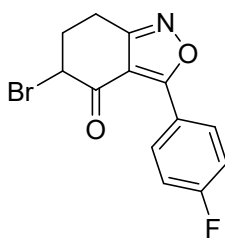

5-bromo-3-(4-fluorophenyl)-6,7-dihydrobenzo[c]isoxazol-4(5H)-one

Chemical Formula: C<sub>13</sub>H<sub>9</sub>BrFNO<sub>2</sub>

Exact Mass: 308,9801

Molecular Weight: 310,1224

**6c**

<sup>1</sup>H spectra of **6c**:

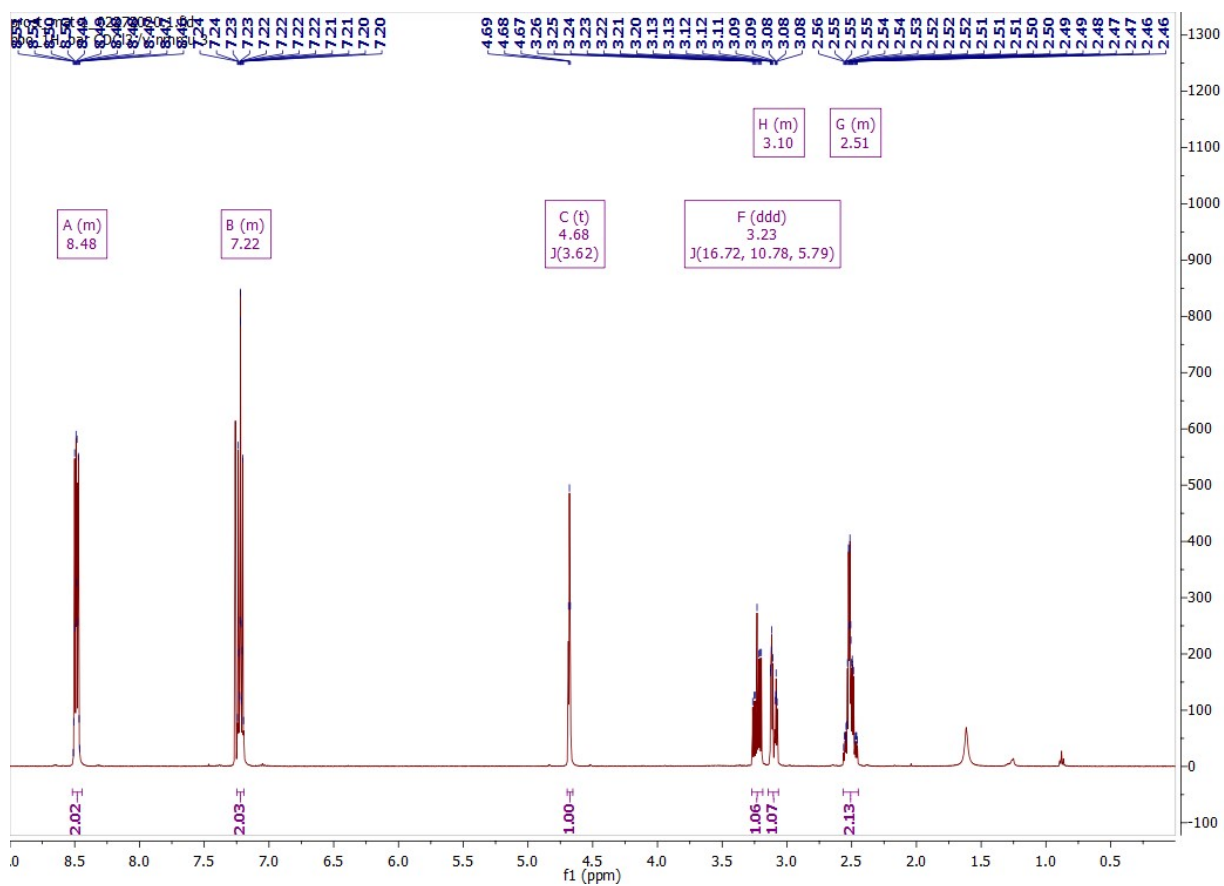

<sup>13</sup>C spectra of **6c**:

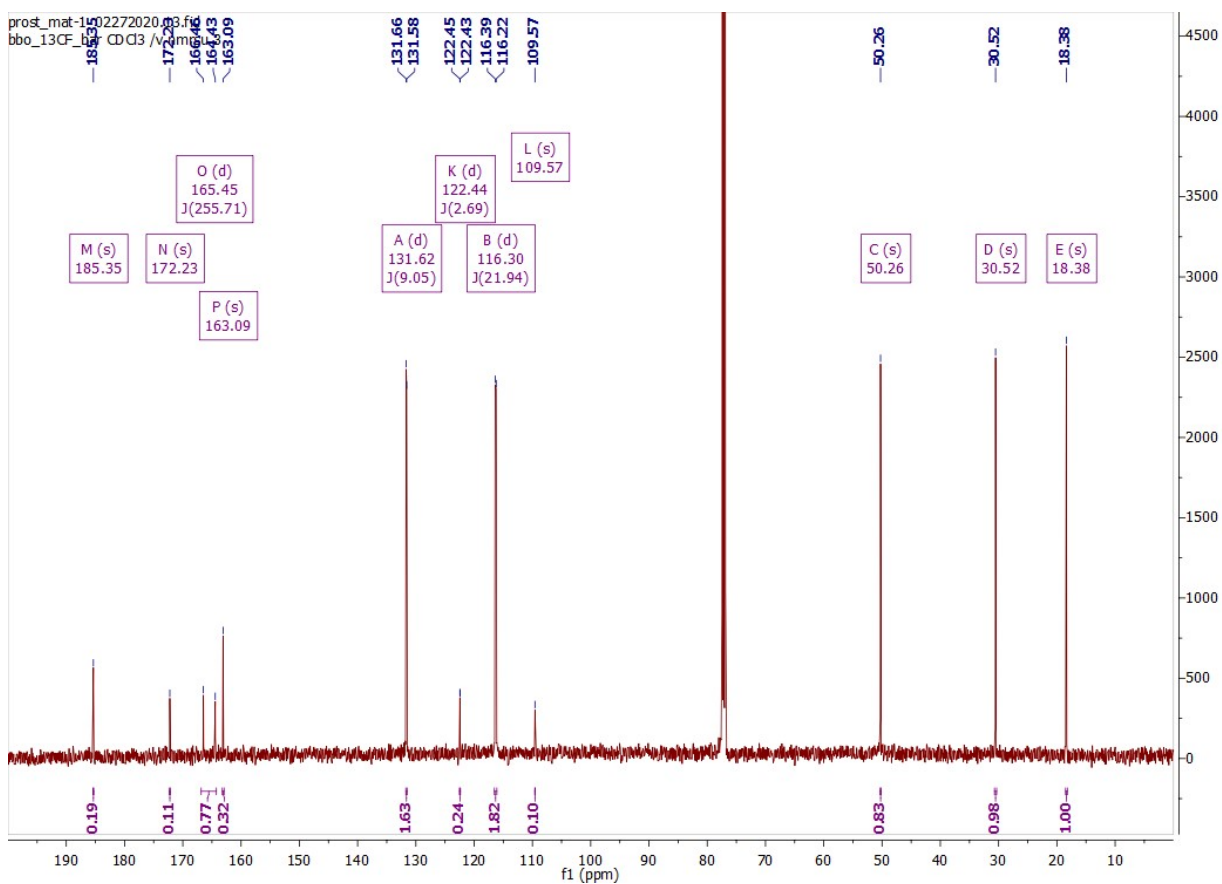

<sup>19</sup>F spectra of **6c**:

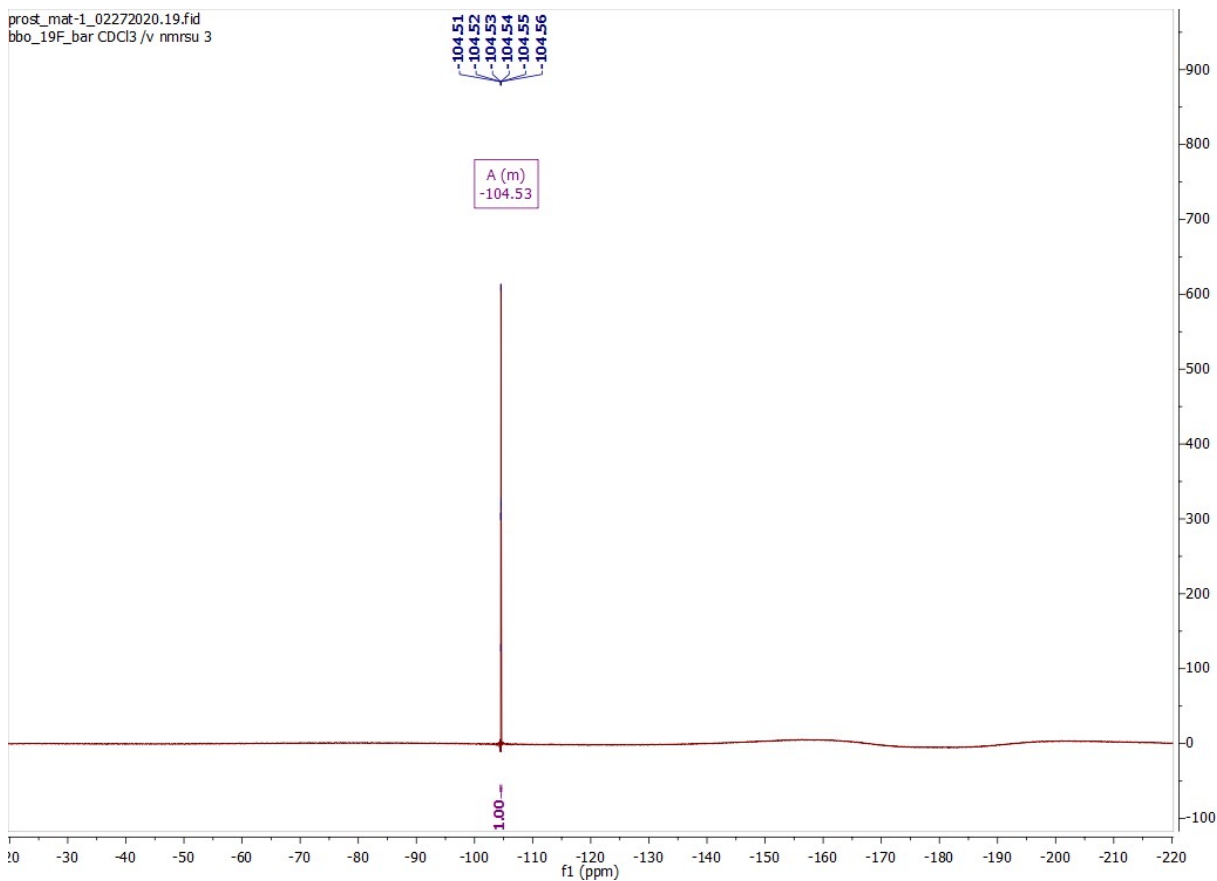



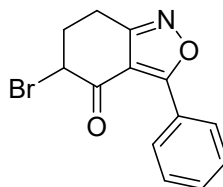

5-bromo-3-phenyl-6,7-dihydrobenzo[*c*]isoxazol-4(5*H*)-one

Chemical Formula:  $C_{13}H_{10}BrNO_2$

Exact Mass: 290,9895

Molecular Weight: 292,1320

**6d**

$^1H$  spectra of **6d**:

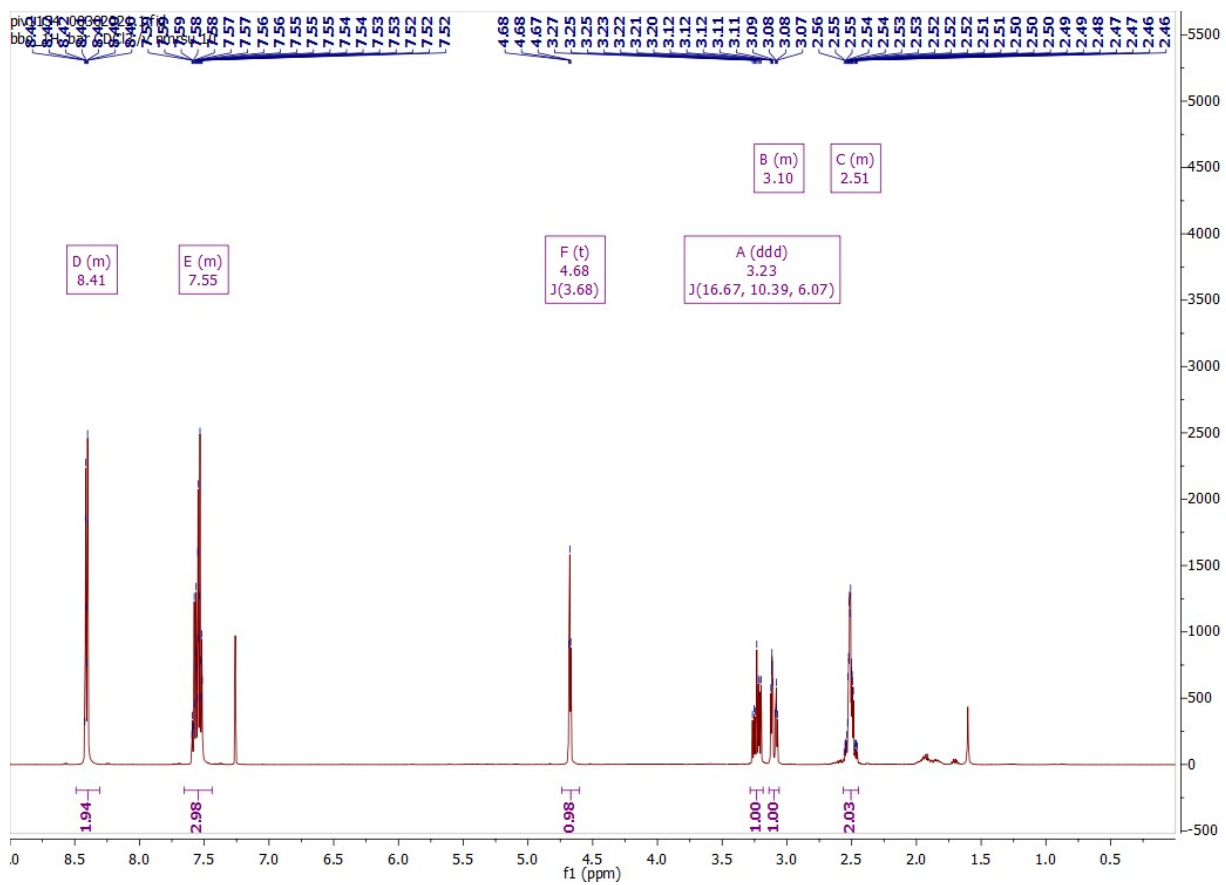

$^{13}\text{C}$  spectra of **6d**:

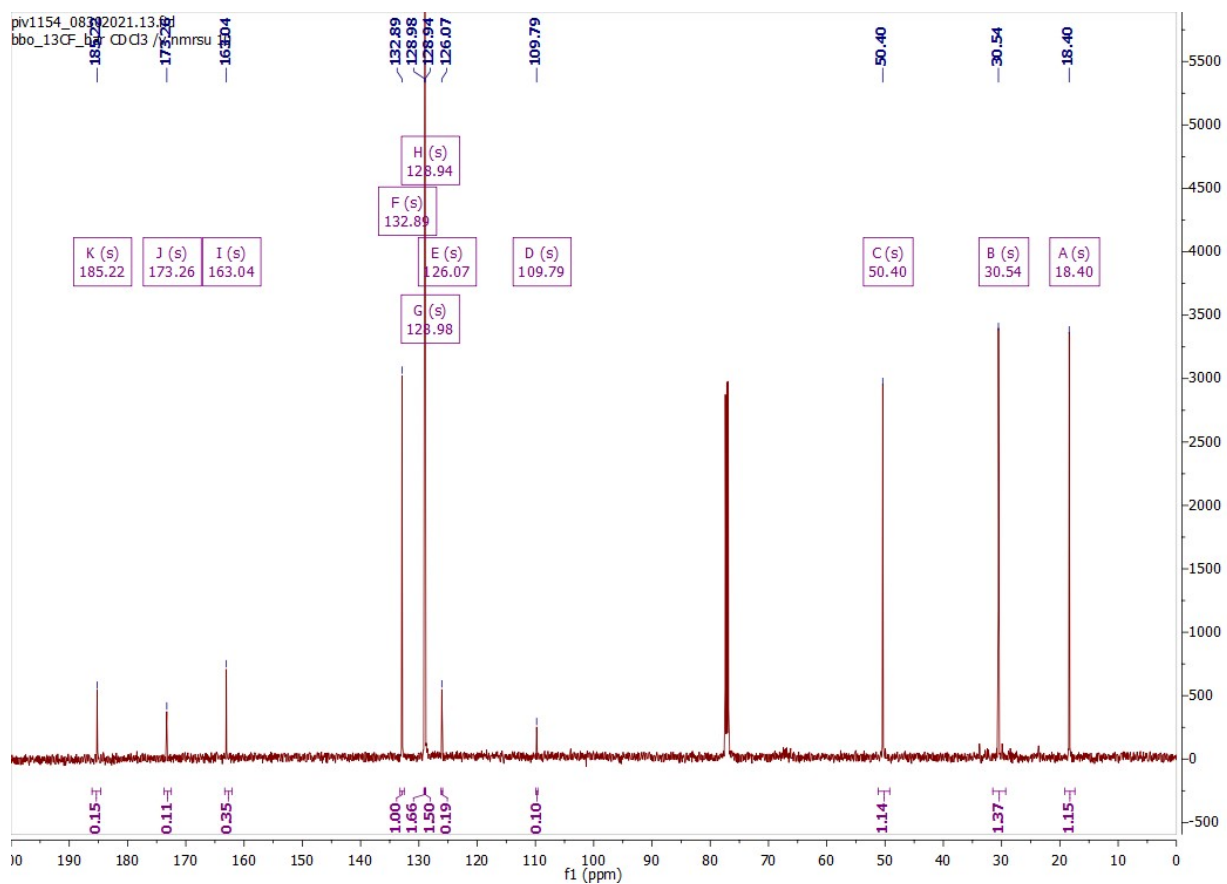

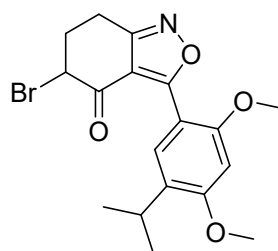

5-bromo-3-(5-isopropyl-2,4-dimethoxyphenyl)-6,7-dihydrobenzo[*c*]isoxazol-4(5*H*)-one

Chemical Formula: C<sub>18</sub>H<sub>20</sub>BrNO<sub>4</sub>

Exact Mass: 393,0576

Molecular Weight: 394,2650

**6e**

<sup>1</sup>H spectra of **6e**:

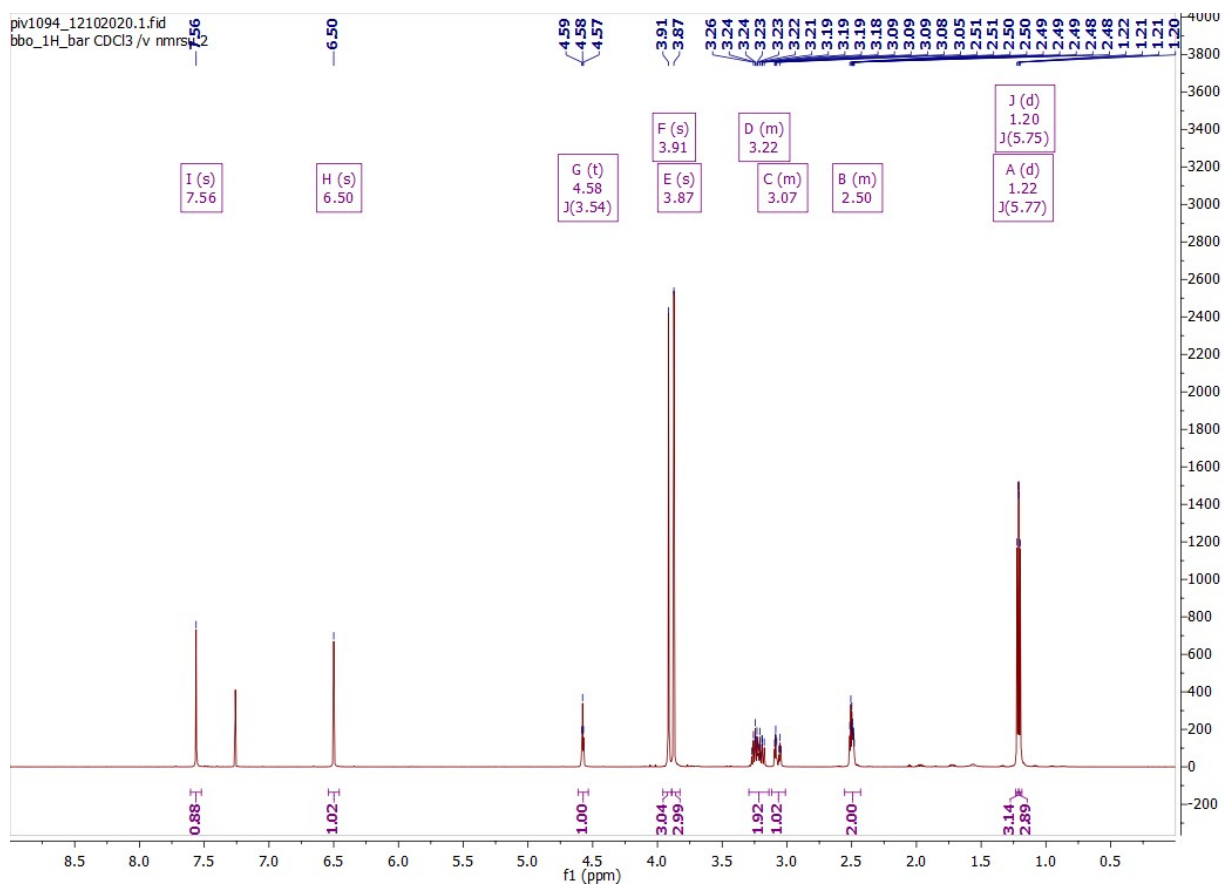

<sup>13</sup>C spectra of 6e:

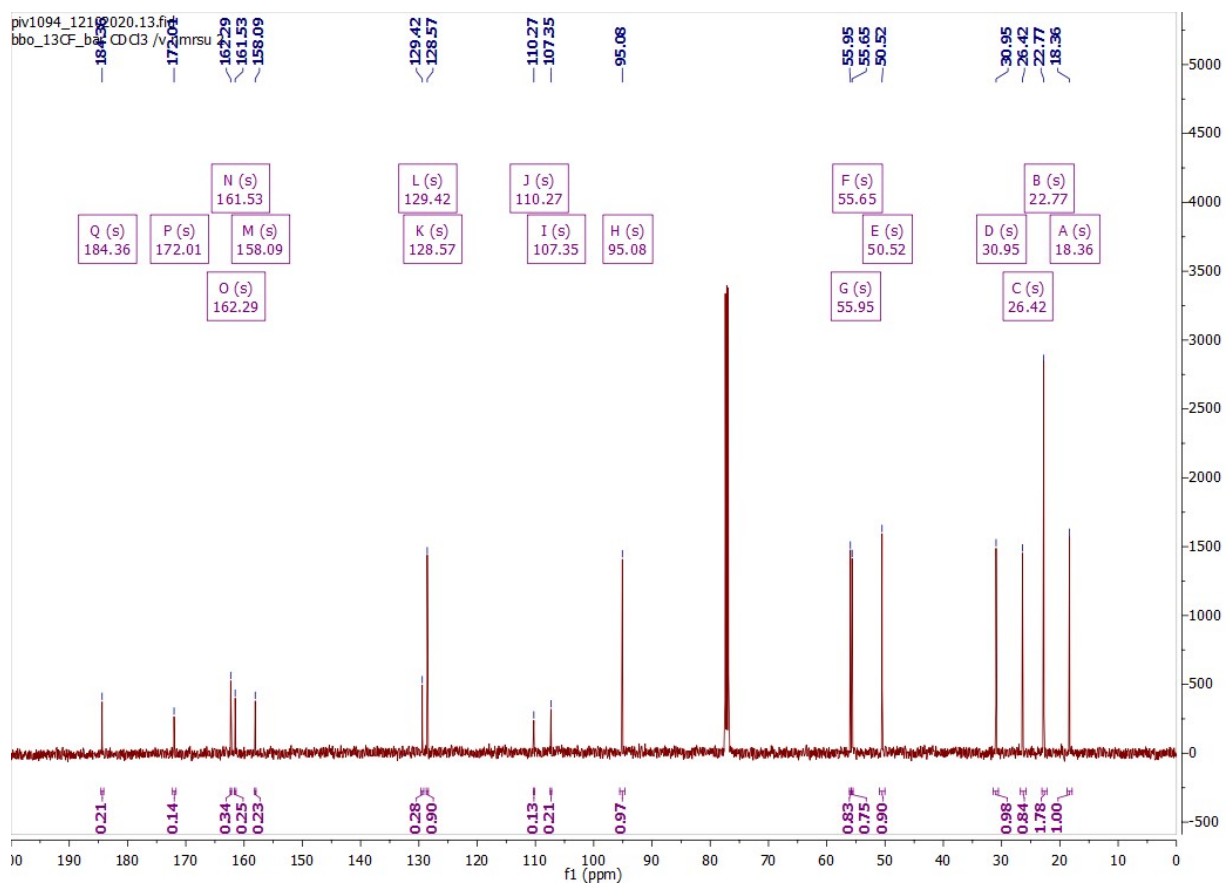

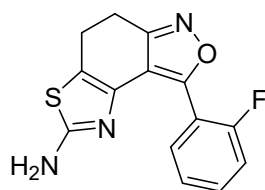

8-(2-fluorophenyl)-4,5-dihydrothiazolo[4',5':3,4]benzo[1,2-c]isoxazol-2-amine

Chemical Formula: C<sub>14</sub>H<sub>10</sub>FN<sub>3</sub>OS

Exact Mass: 287,0529

Molecular Weight: 287,3124

**7a**

<sup>1</sup>H spectra of **7a**:

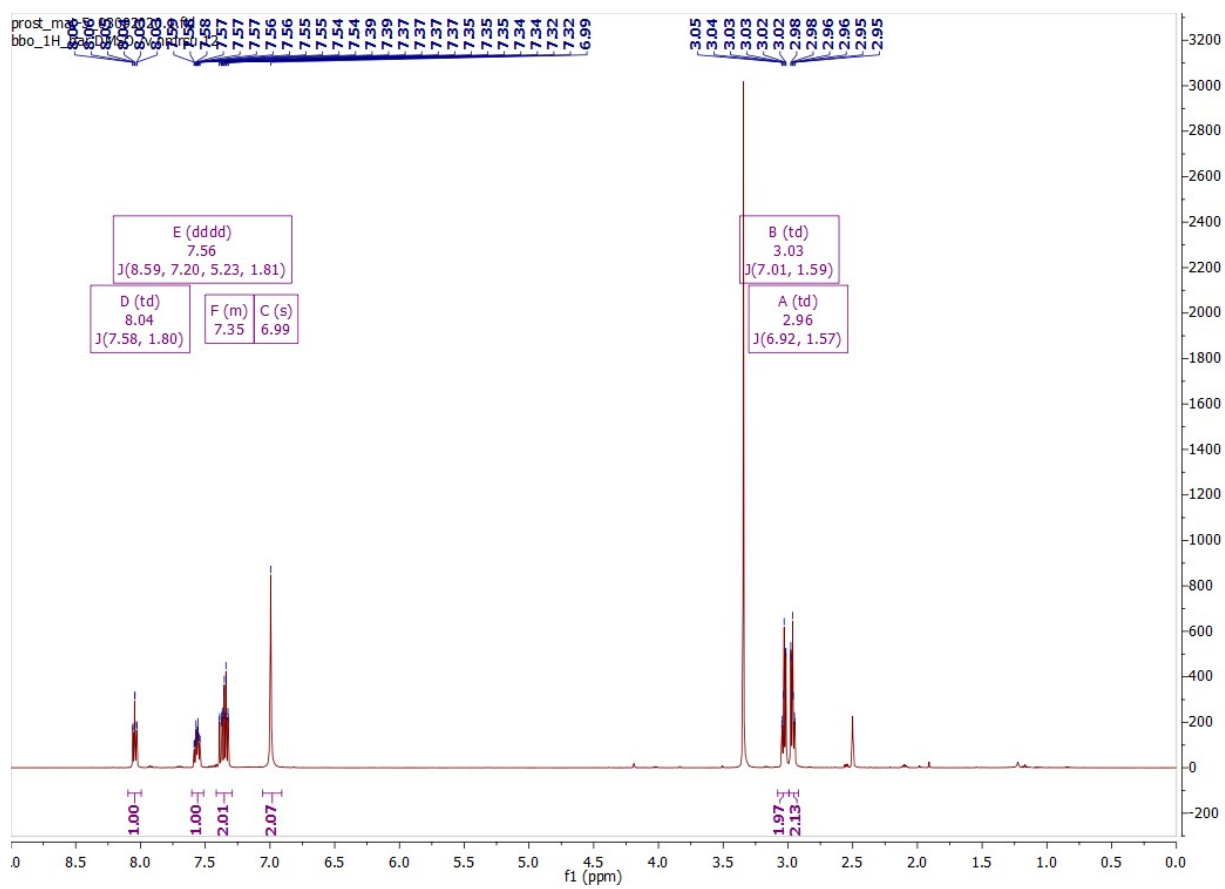

<sup>13</sup>C spectra of 7a:

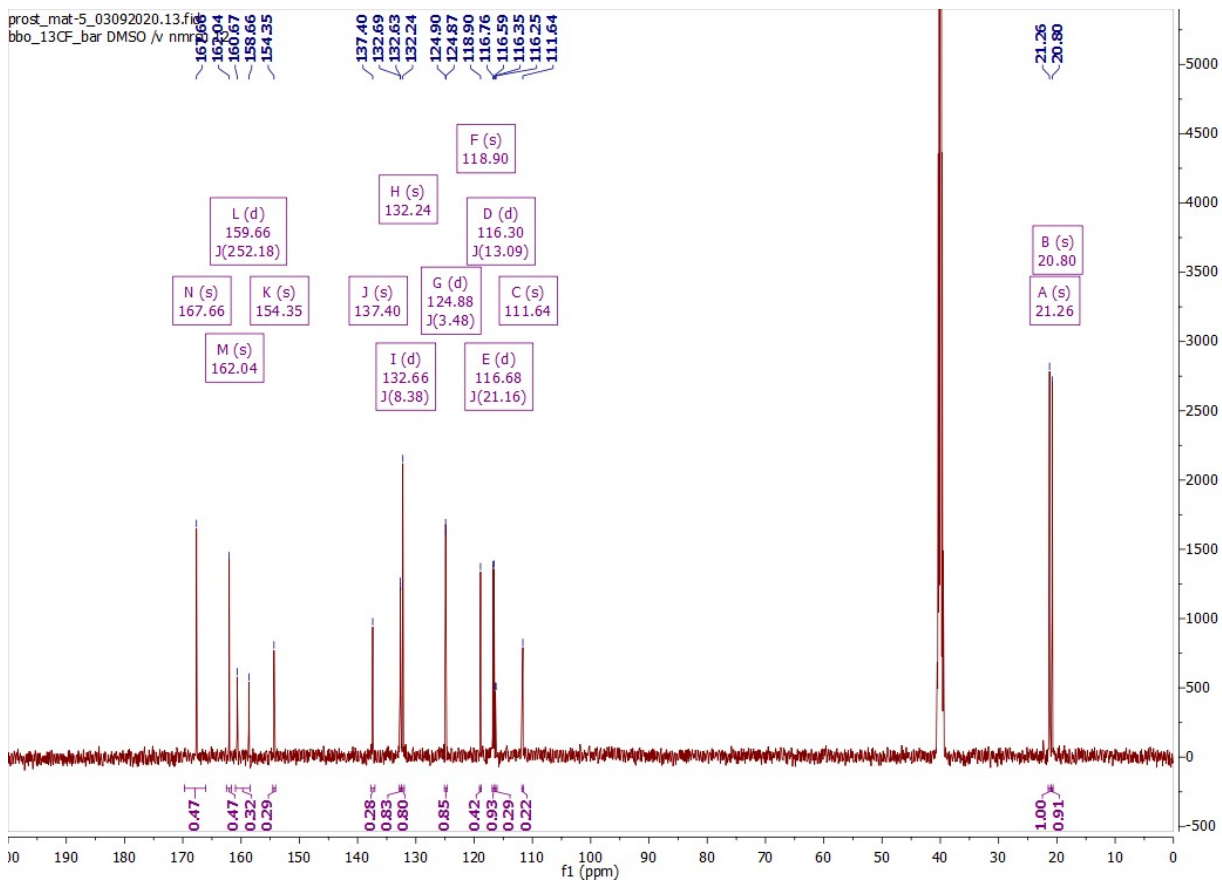

<sup>19</sup>F spectra of 7a:

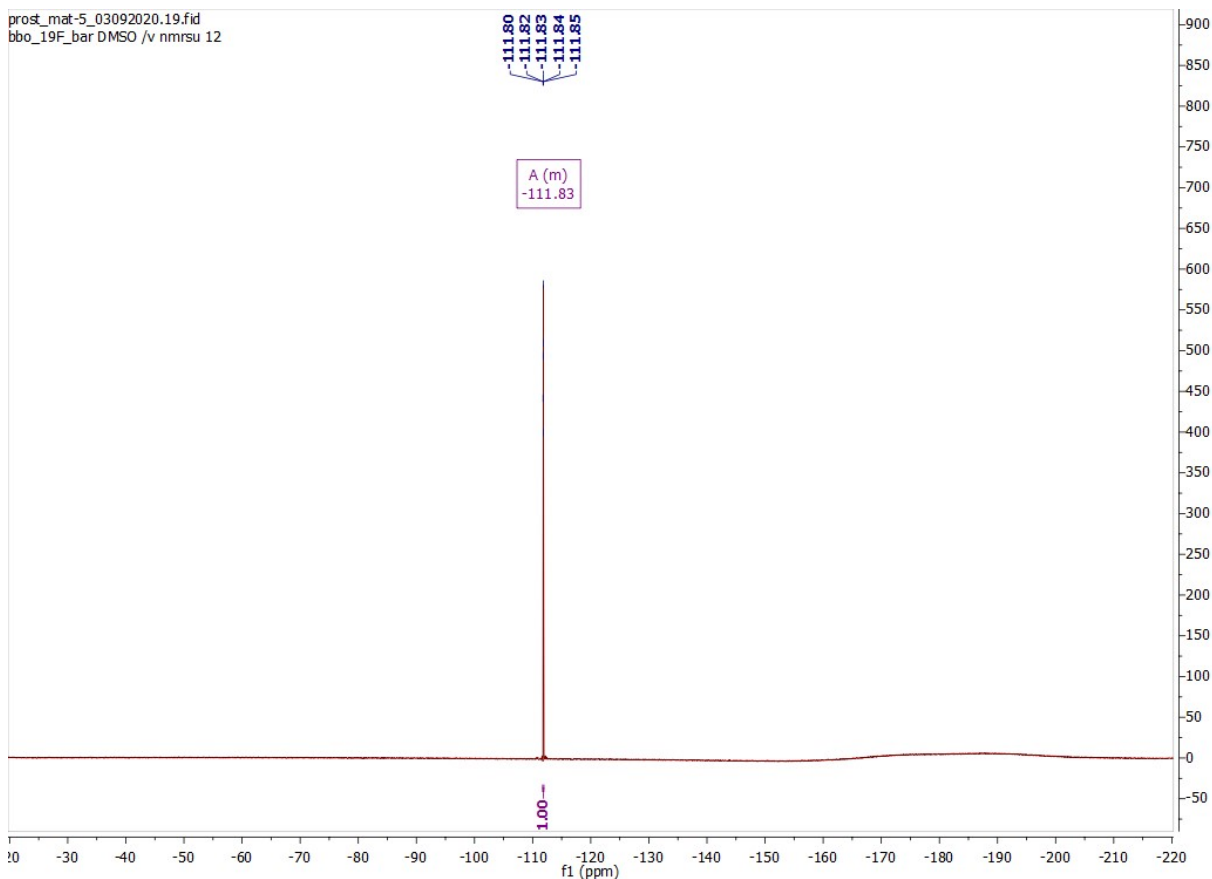

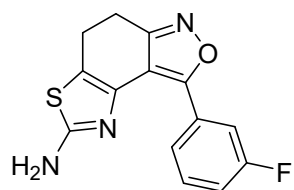

8-(3-fluorophenyl)-4,5-dihydrothiazolo[4',5':3,4]benzo[1,2-c]isoxazol-2-amine

Chemical Formula: C<sub>14</sub>H<sub>10</sub>FN<sub>3</sub>OS

Exact Mass: 287,0529

Molecular Weight: 287,3124

**7b**

<sup>1</sup>H spectra of **7b**:

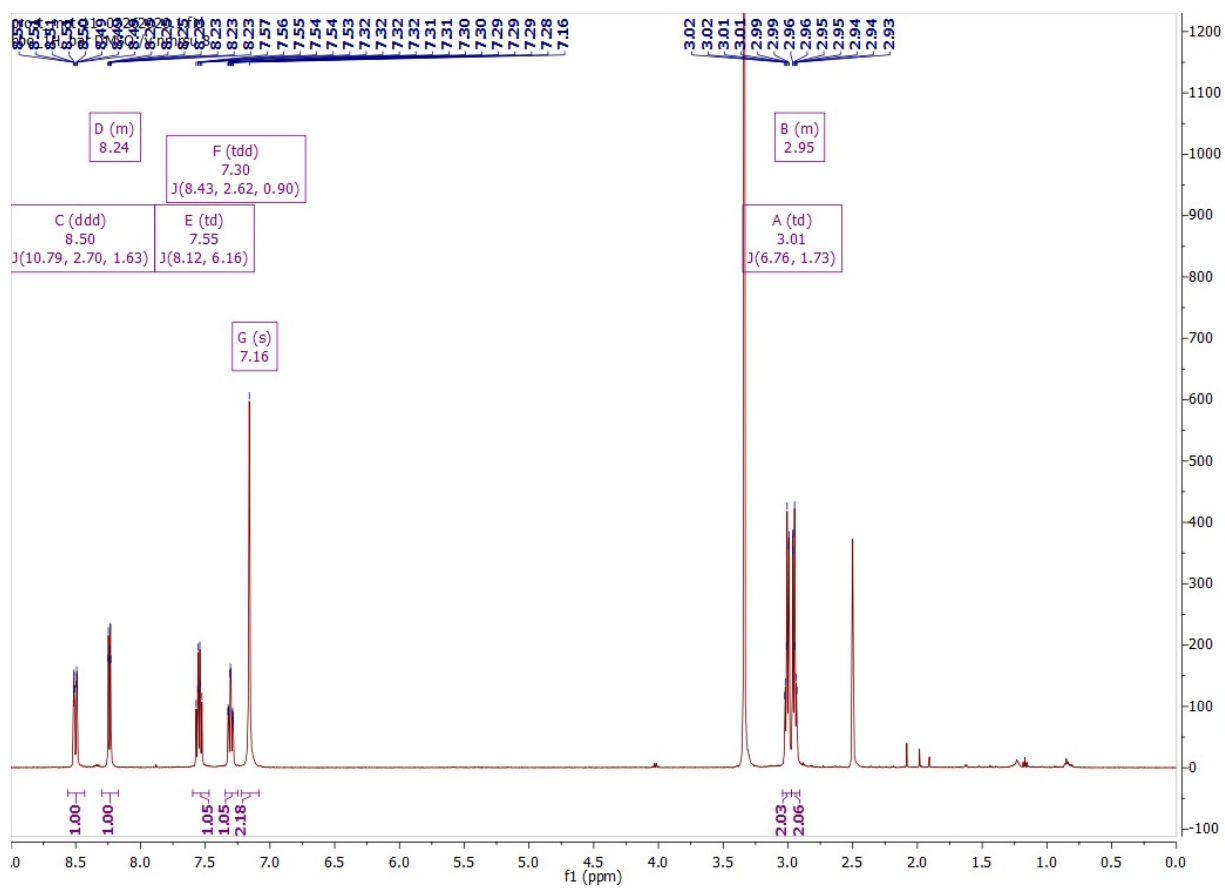

<sup>13</sup>C spectra of **7b**:

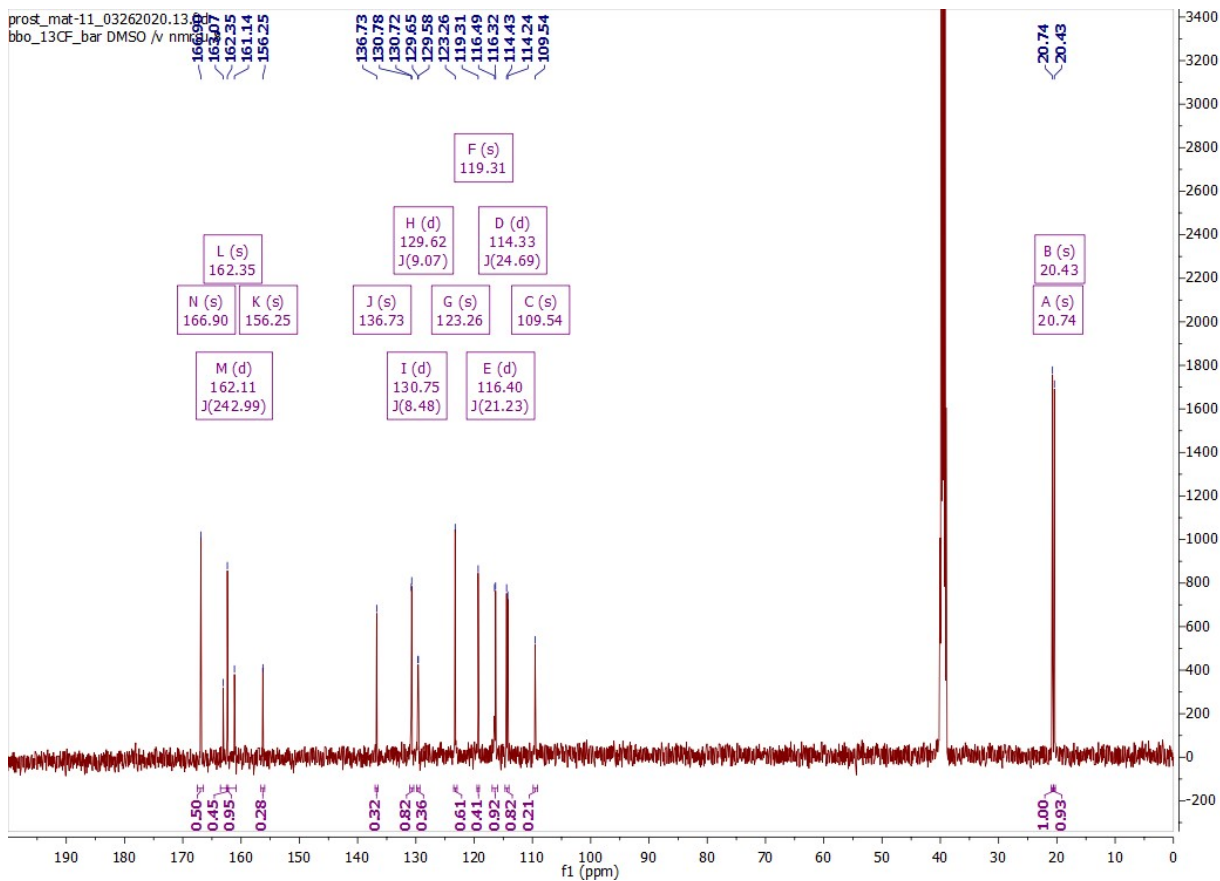

<sup>19</sup>F spectra of **7b**:

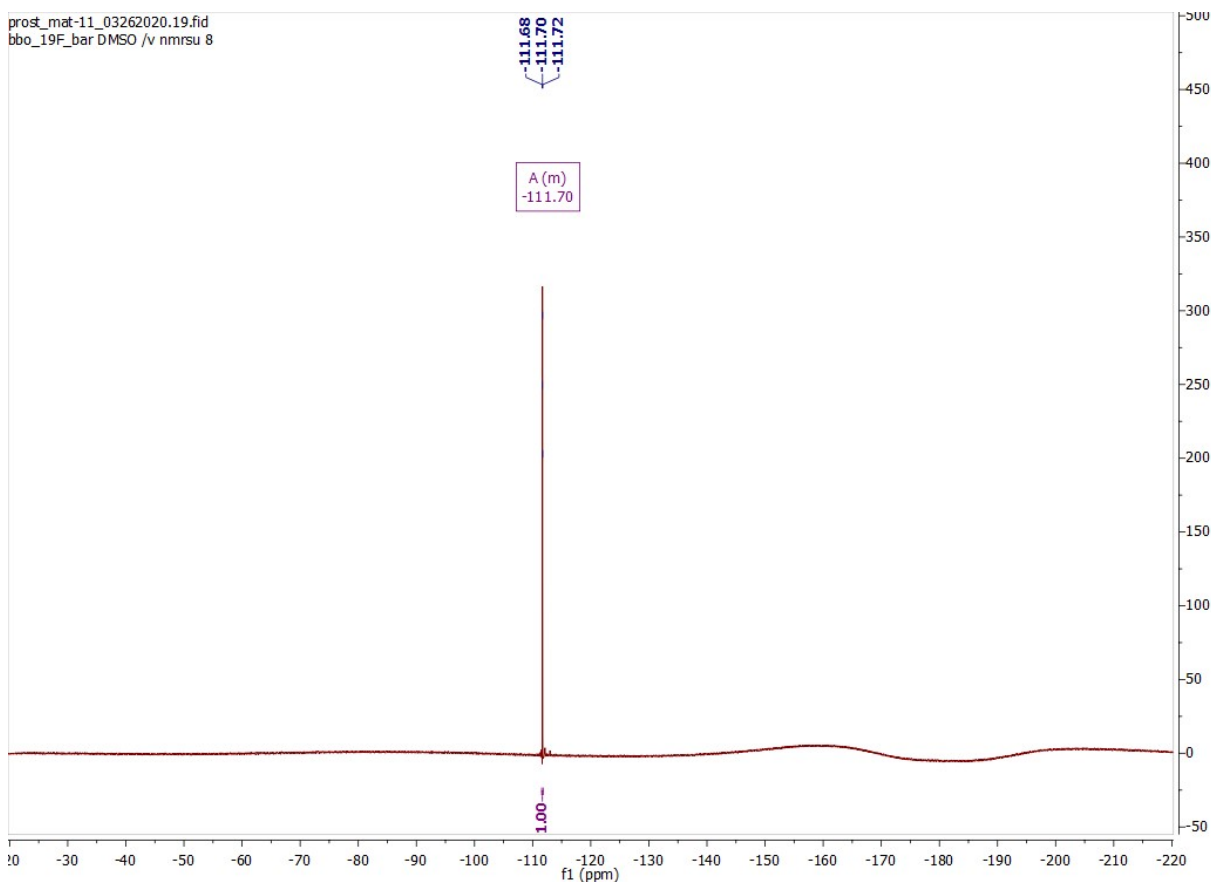



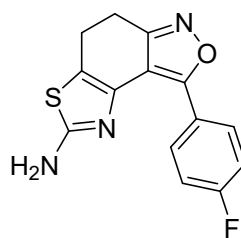

8-(4-fluorophenyl)-4,5-dihydrothiazolo[4',5':3,4]benzo[1,2-c]isoxazol-2-amine

Chemical Formula: C<sub>14</sub>H<sub>10</sub>FN<sub>3</sub>OS

Exact Mass: 287,0529

Molecular Weight: 287,3124

7c

<sup>1</sup>H spectra of 7c:

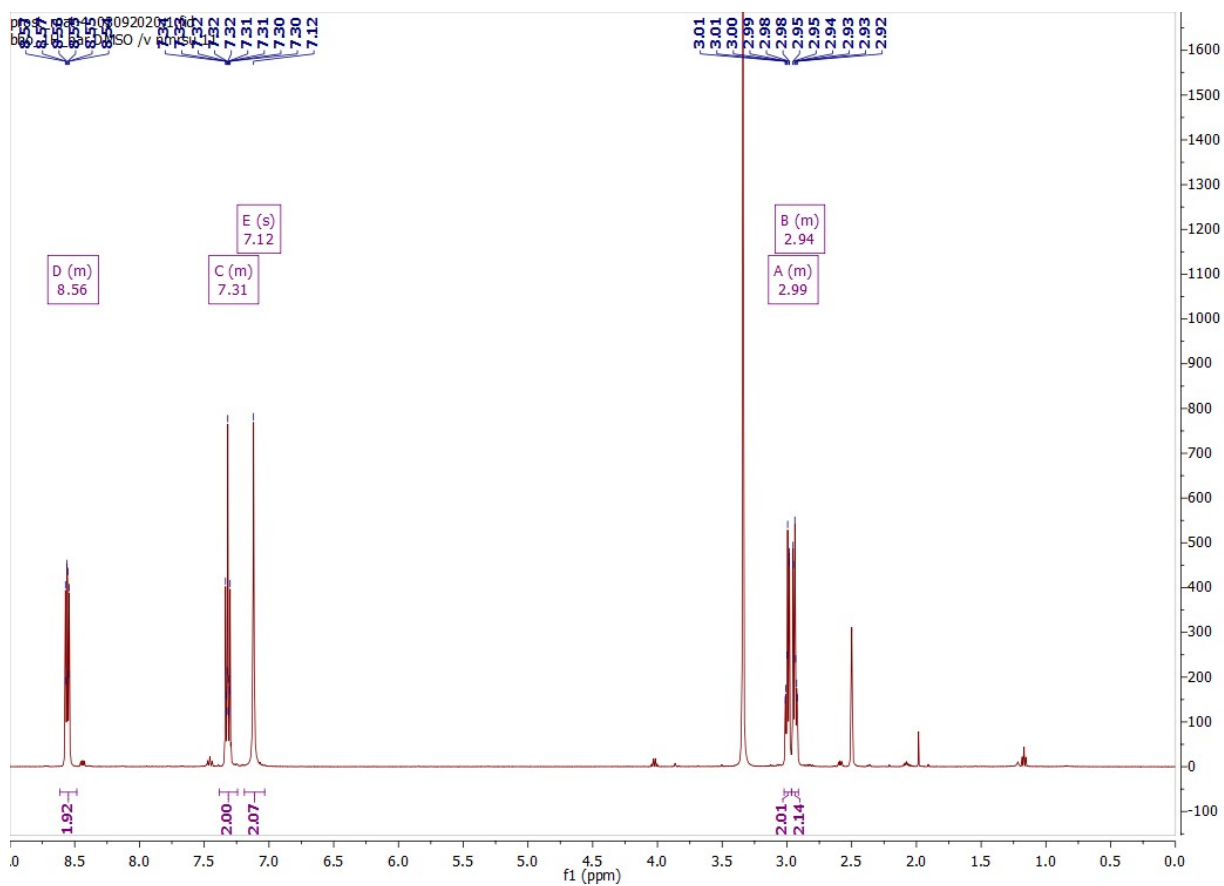

<sup>13</sup>C spectra of 7c:

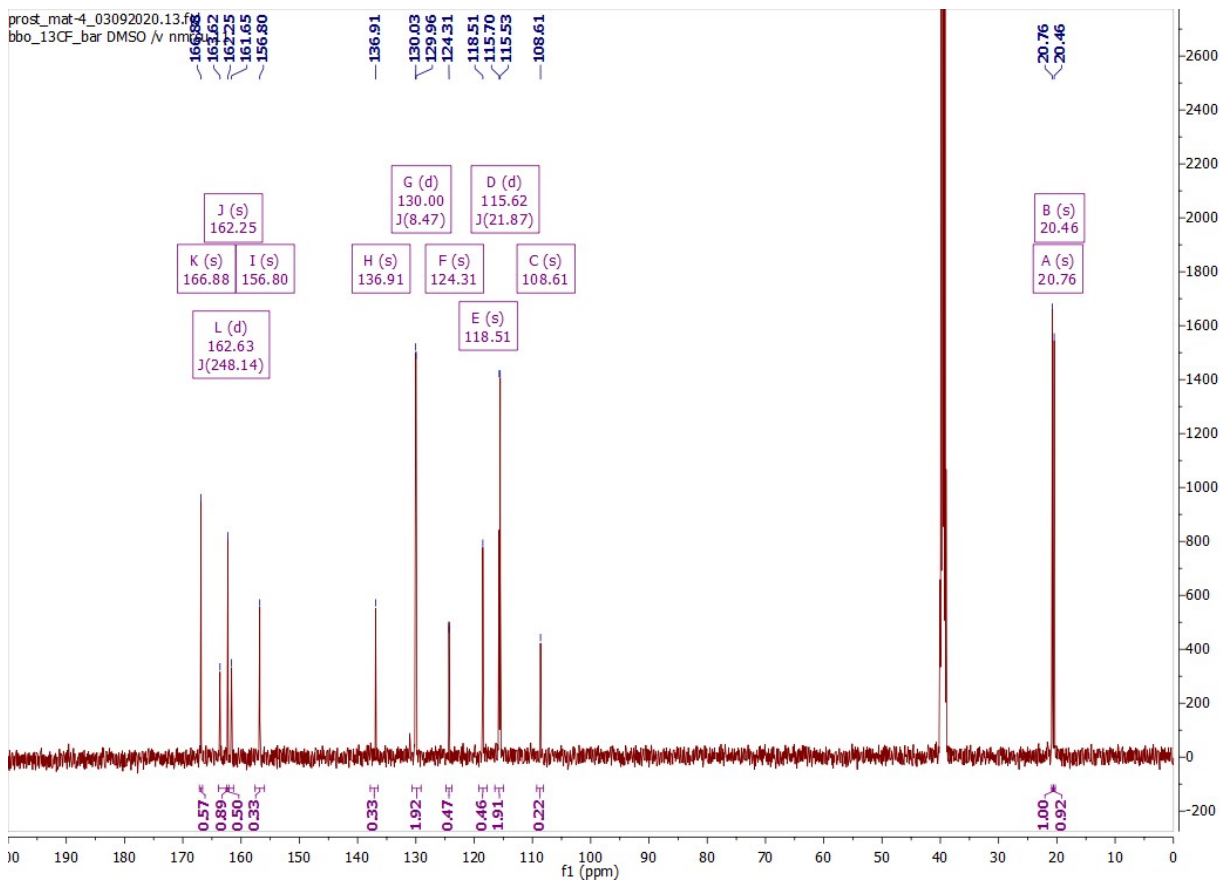

<sup>19</sup>F spectra of 7c:

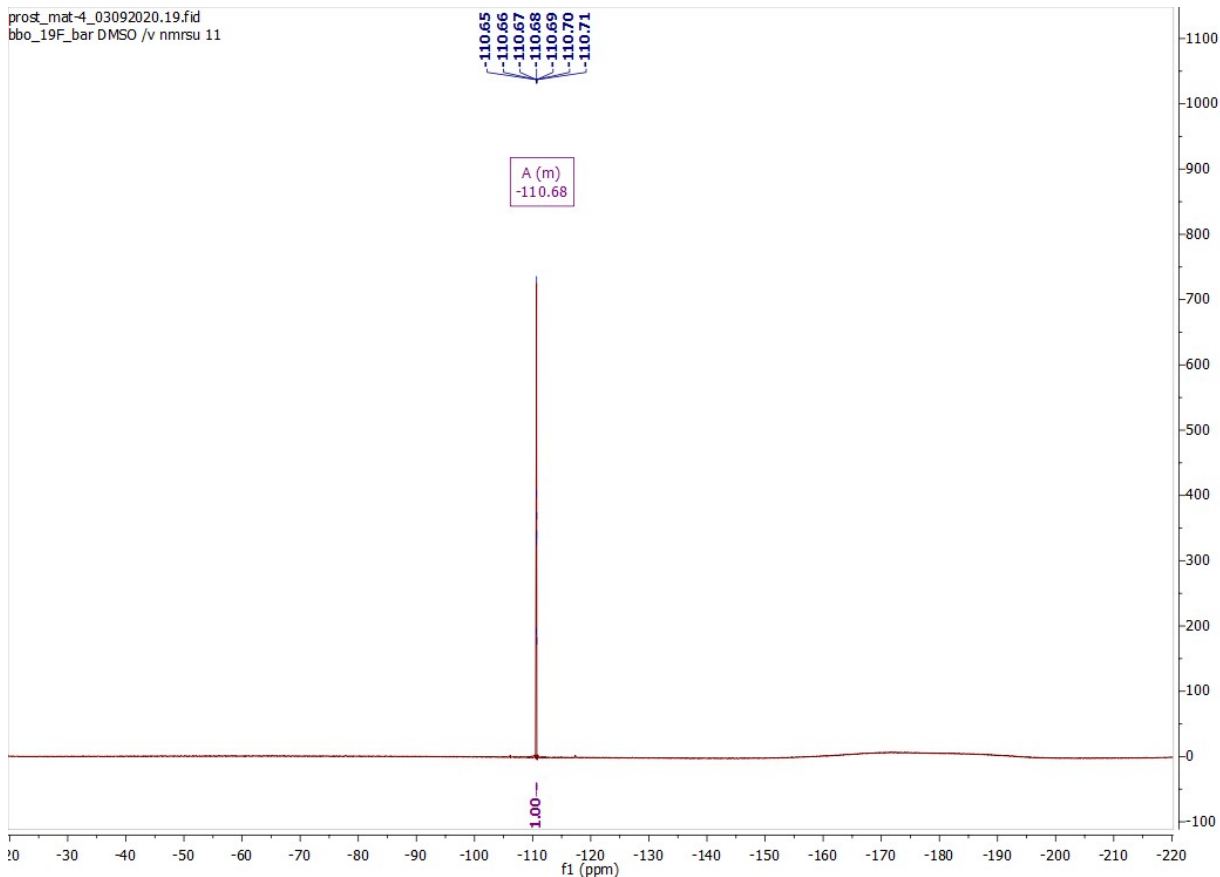

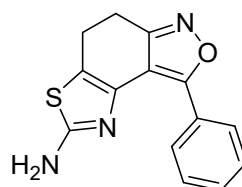

8-phenyl-4,5-dihydrothiazolo[4',5':3,4]benzo[1,2-c]isoxazol-2-amine

Chemical Formula: C<sub>14</sub>H<sub>11</sub>N<sub>3</sub>OS

Exact Mass: 269,0623

Molecular Weight: 269,3220

**7d**

<sup>1</sup>H spectra of **7d**:

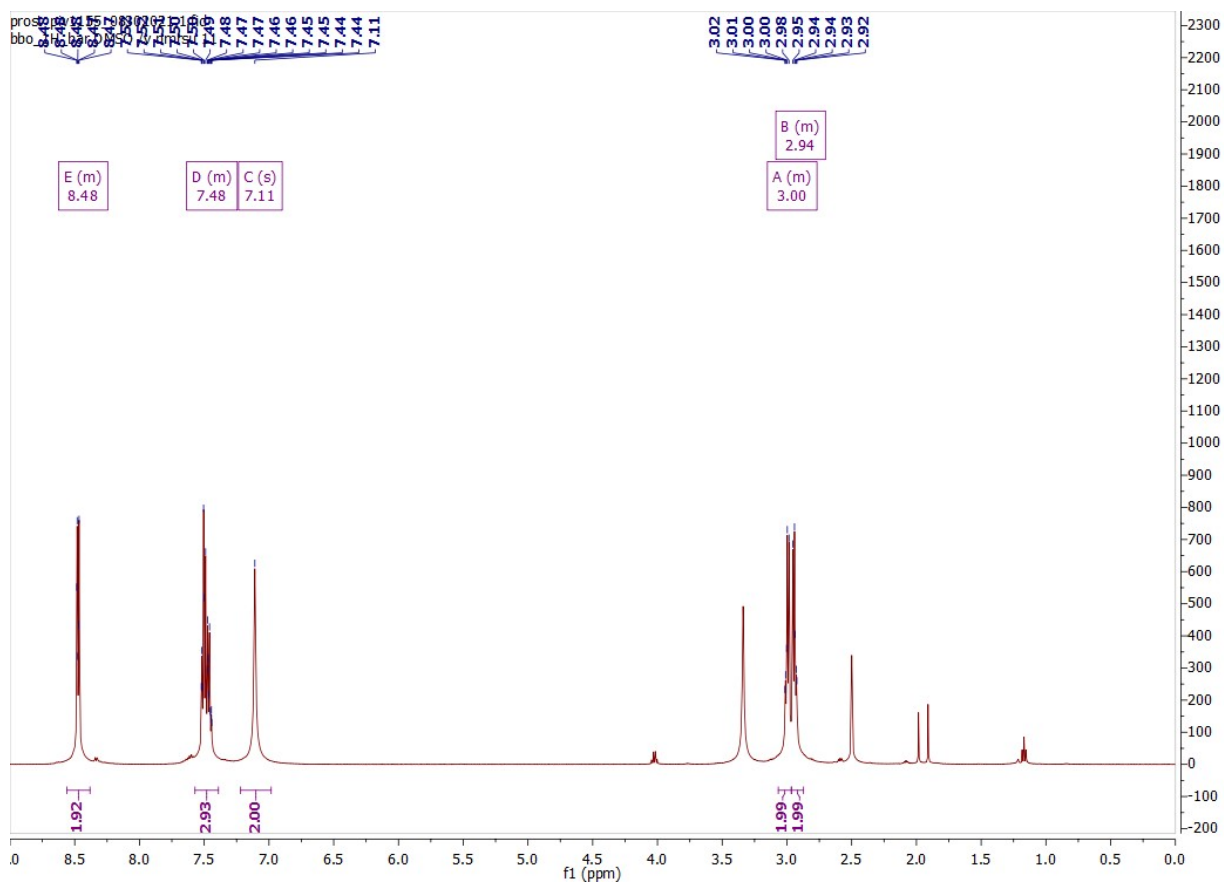

<sup>13</sup>C spectra of 7d:

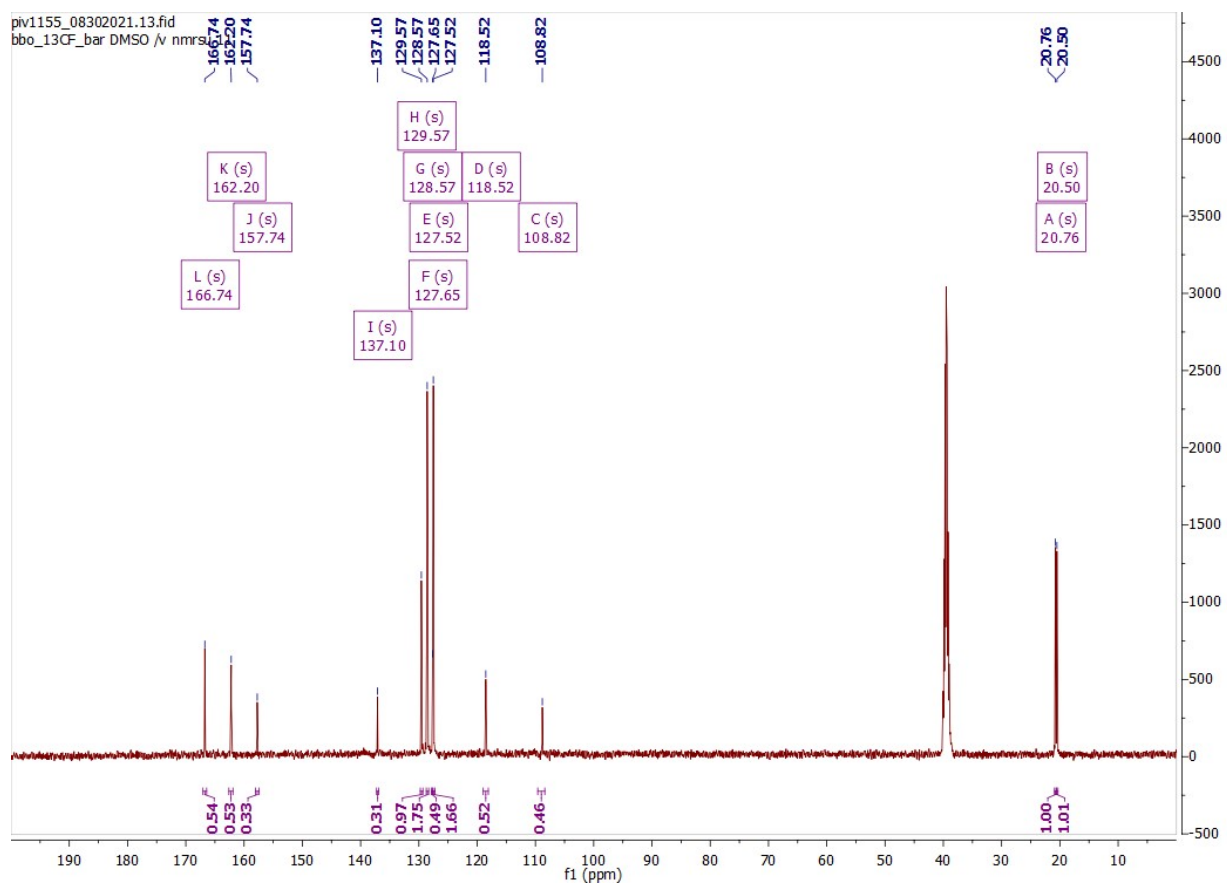

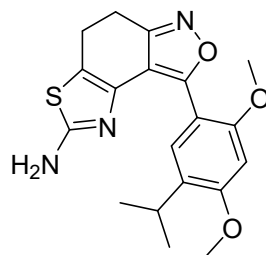

8-(5-isopropyl-2,4-dimethoxyphenyl)-4,5-dihydrothiazolo[4',5':3,4]benzo[1,2-c]isoxazol-2-amine

Chemical Formula: C<sub>19</sub>H<sub>21</sub>N<sub>3</sub>O<sub>3</sub>S

Exact Mass: 371,1304

Molecular Weight: 371,4550

7e

<sup>1</sup>H spectra of 7d:

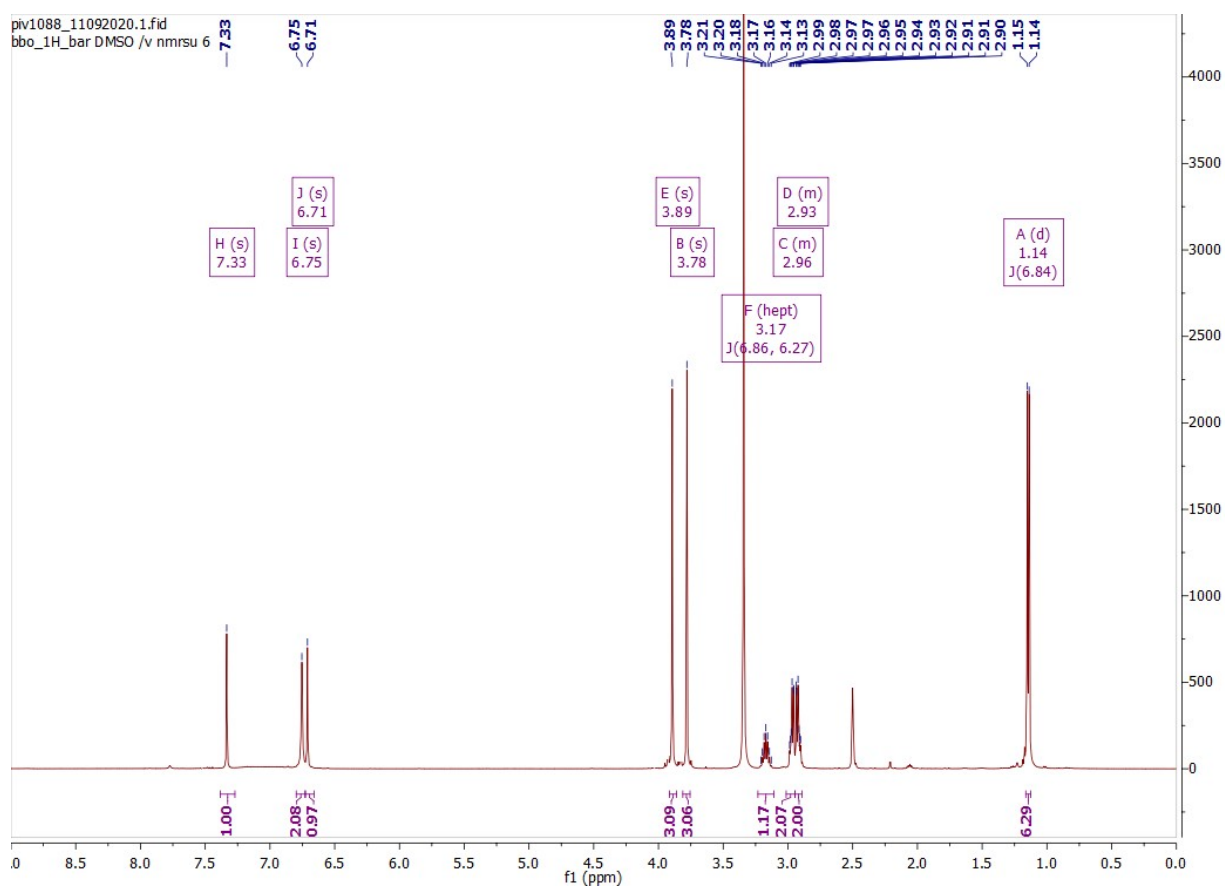

<sup>13</sup>C spectra of 7e:

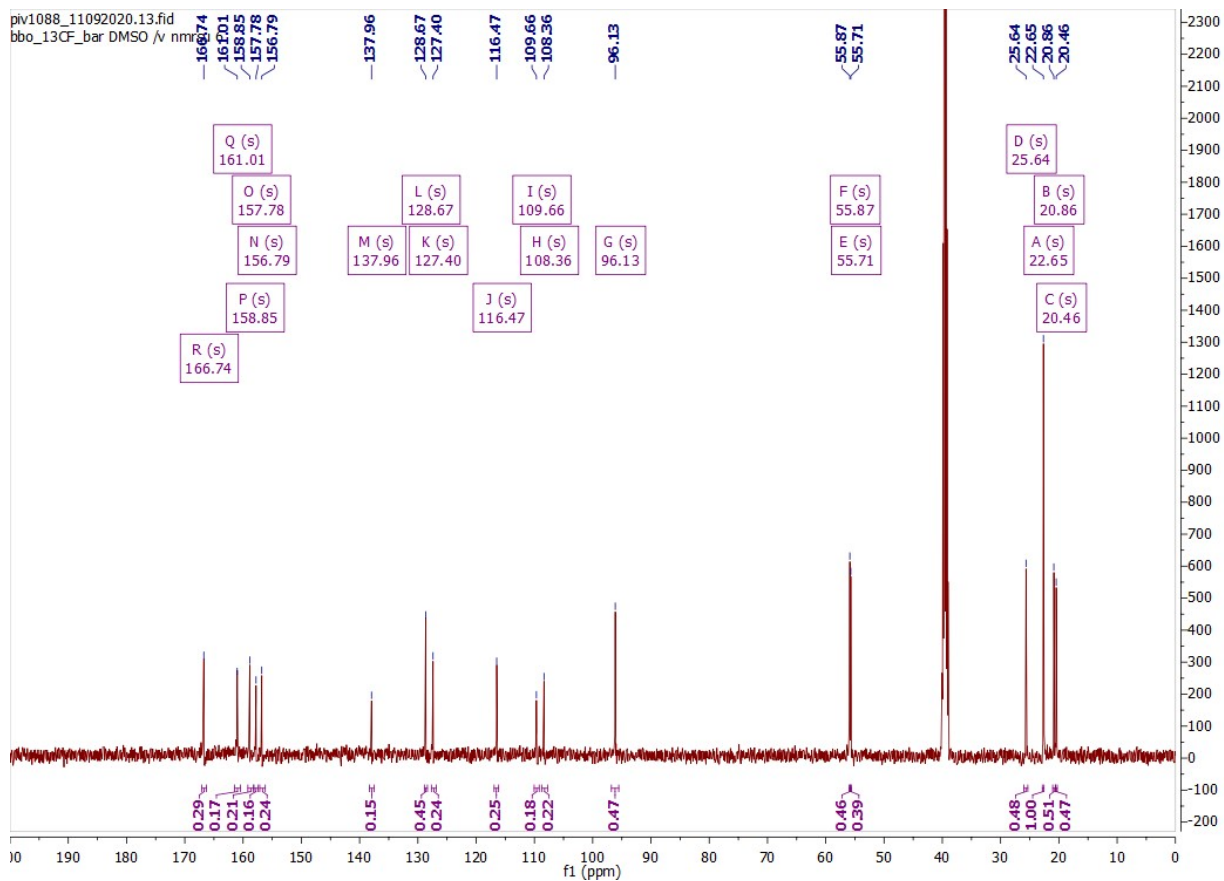

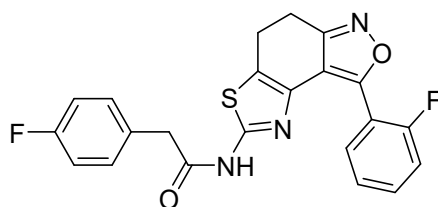

2-(4-fluorophenyl)-N-(8-(2-fluorophenyl)-4,5-dihydrothiazolo[4',5':3,4]benzo[1,2-c]isoxazol-2-yl)acetamide

Chemical Formula:  $C_{22}H_{15}F_2N_3O_2S$

Exact Mass: 423,0853

Molecular Weight: 423,4378

**8a**

$^1H$  spectra of **8a**:

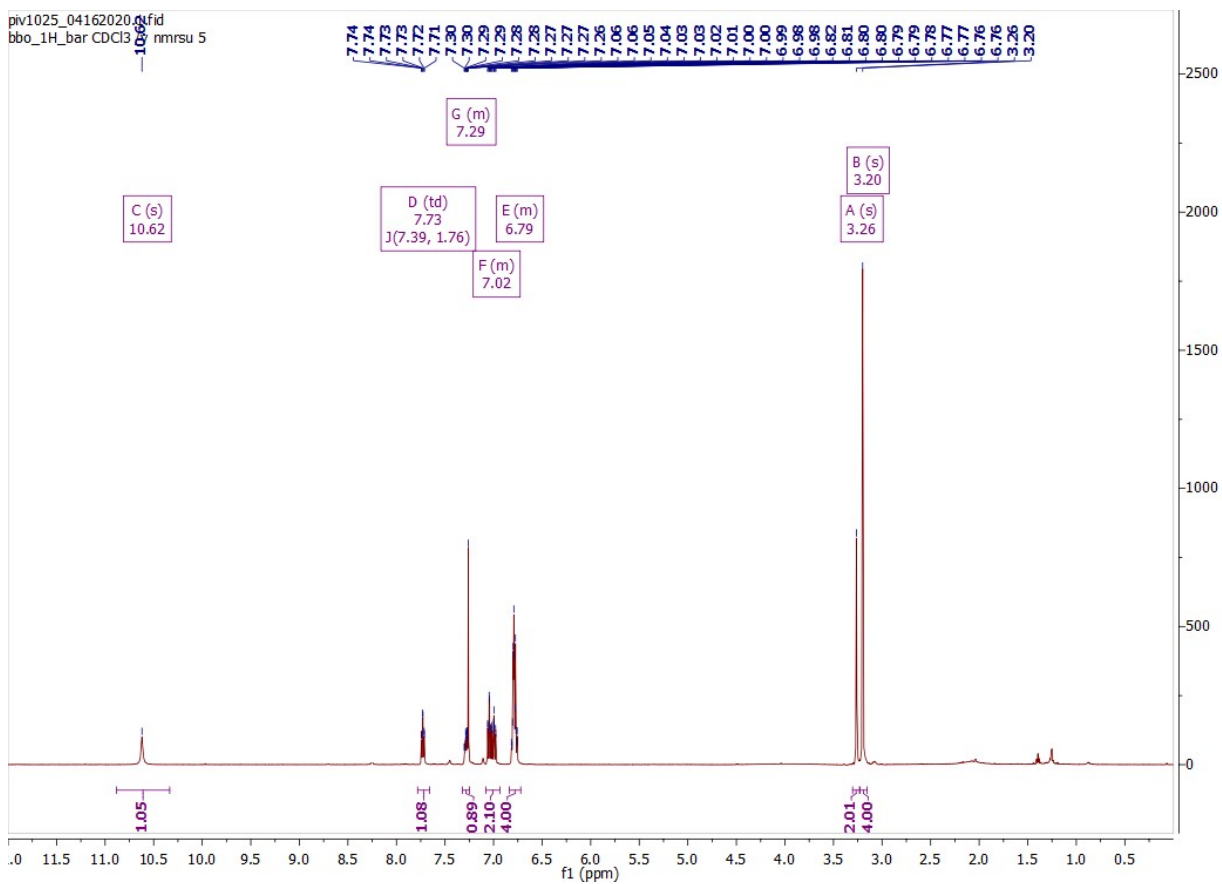

<sup>13</sup>C spectra of **8a**:

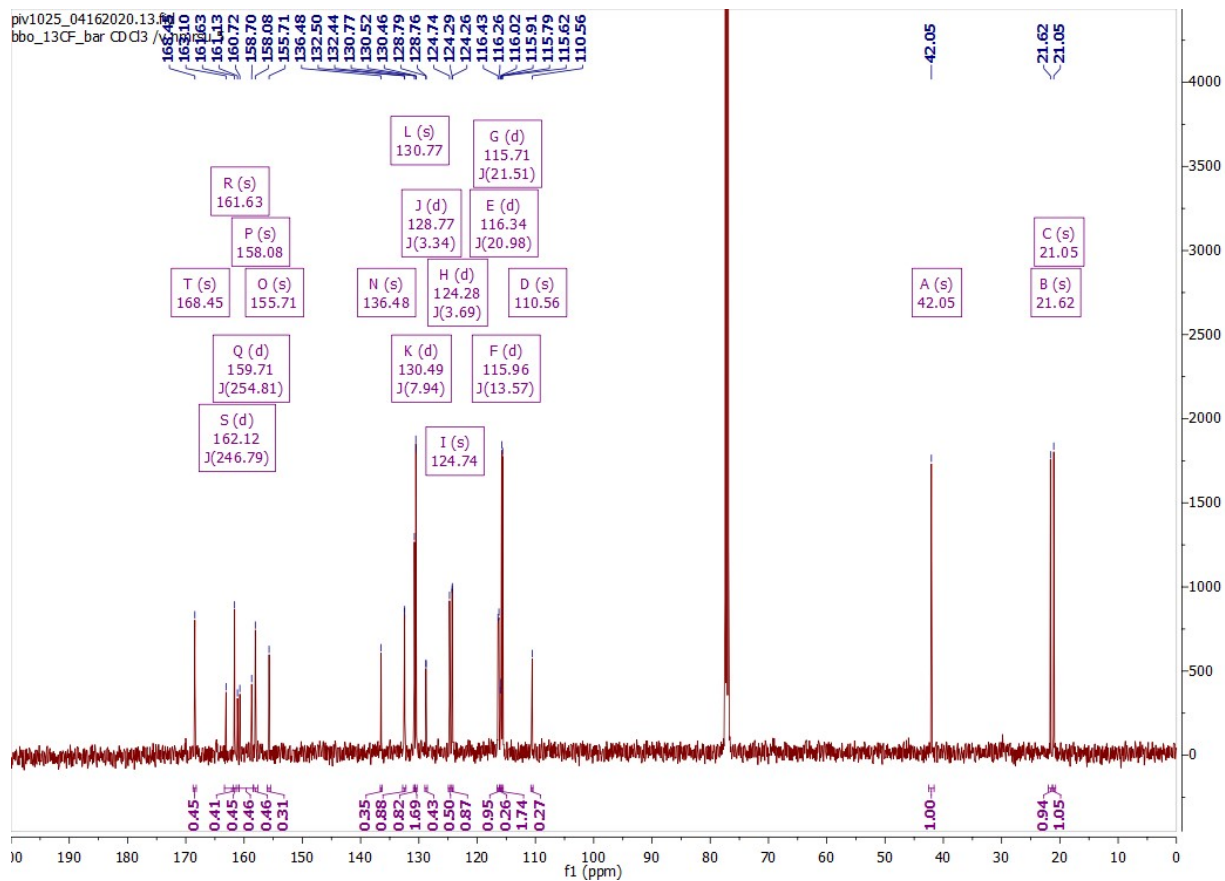

<sup>19</sup>F spectra of **8a**:

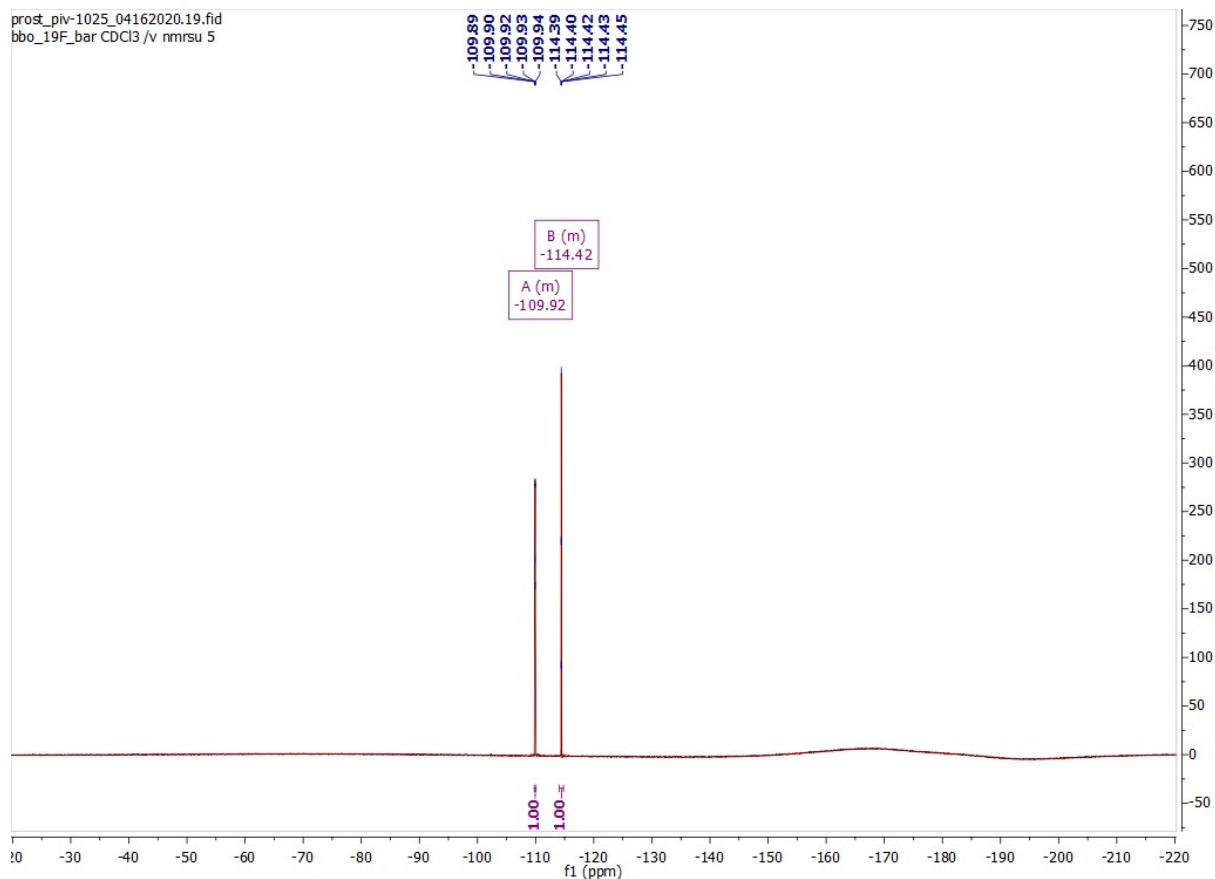





<sup>13</sup>C spectra of **8b**:

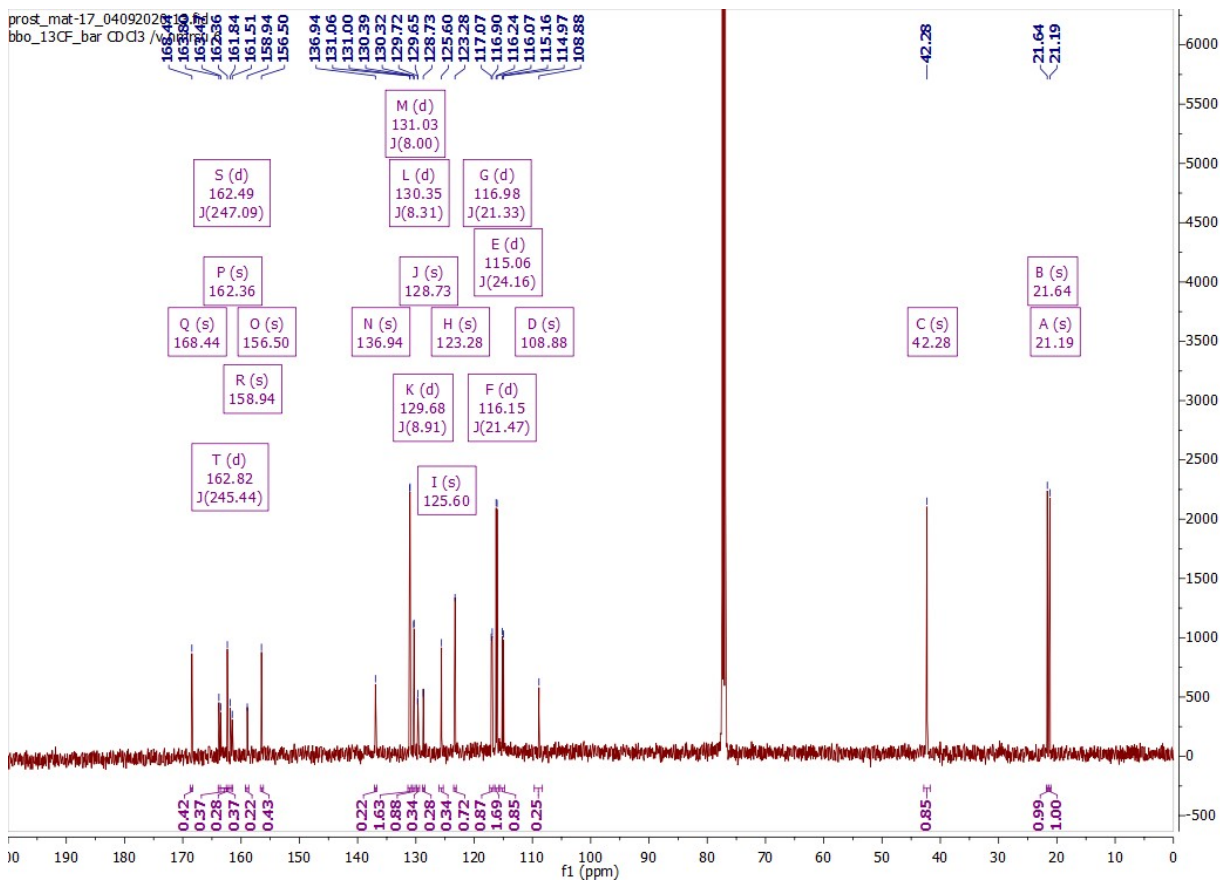

<sup>19</sup>F spectra of **8b**:

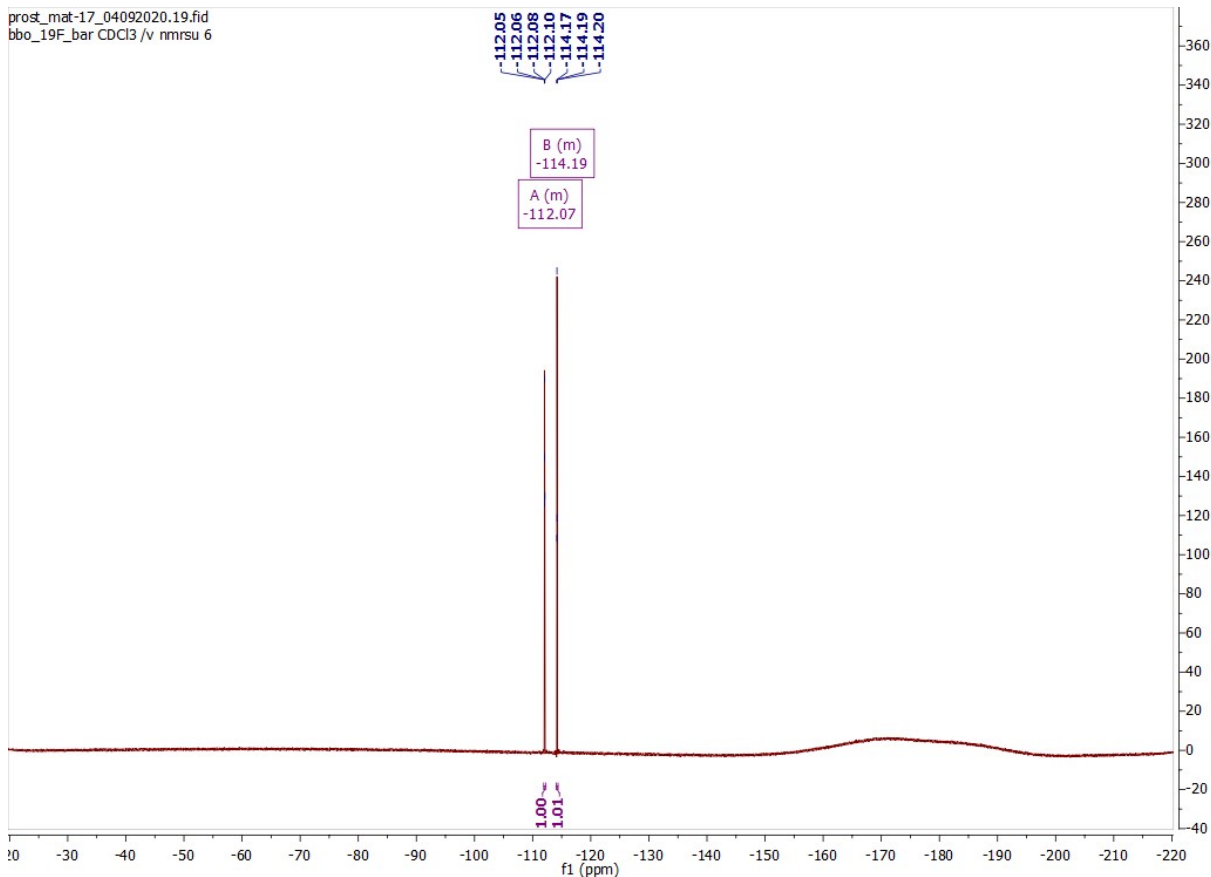

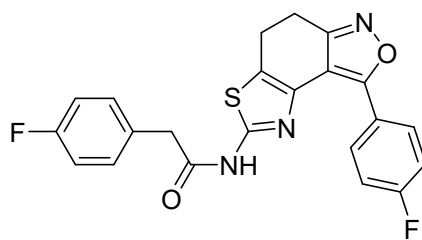

2-(4-fluorophenyl)-N-(8-(4-fluorophenyl)-4,5-dihydrothiazolo[4',5':3,4]benzo[1,2-c]isoxazol-2-yl)acetamide

Chemical Formula: C<sub>22</sub>H<sub>15</sub>F<sub>2</sub>N<sub>3</sub>O<sub>2</sub>S

Molecular Weight: 423.44

**8c**

<sup>1</sup>H spectra of **8c**:

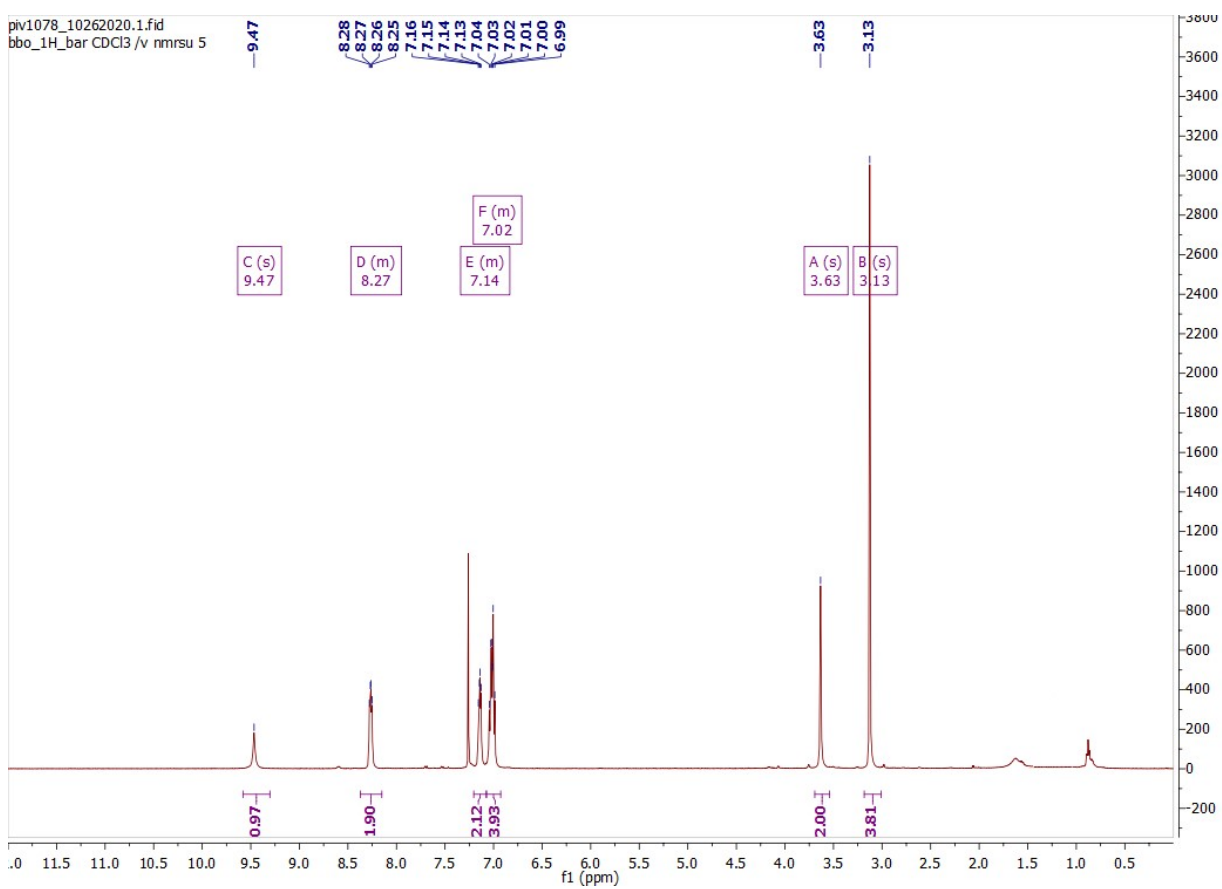

<sup>13</sup>C spectra of **8c**:

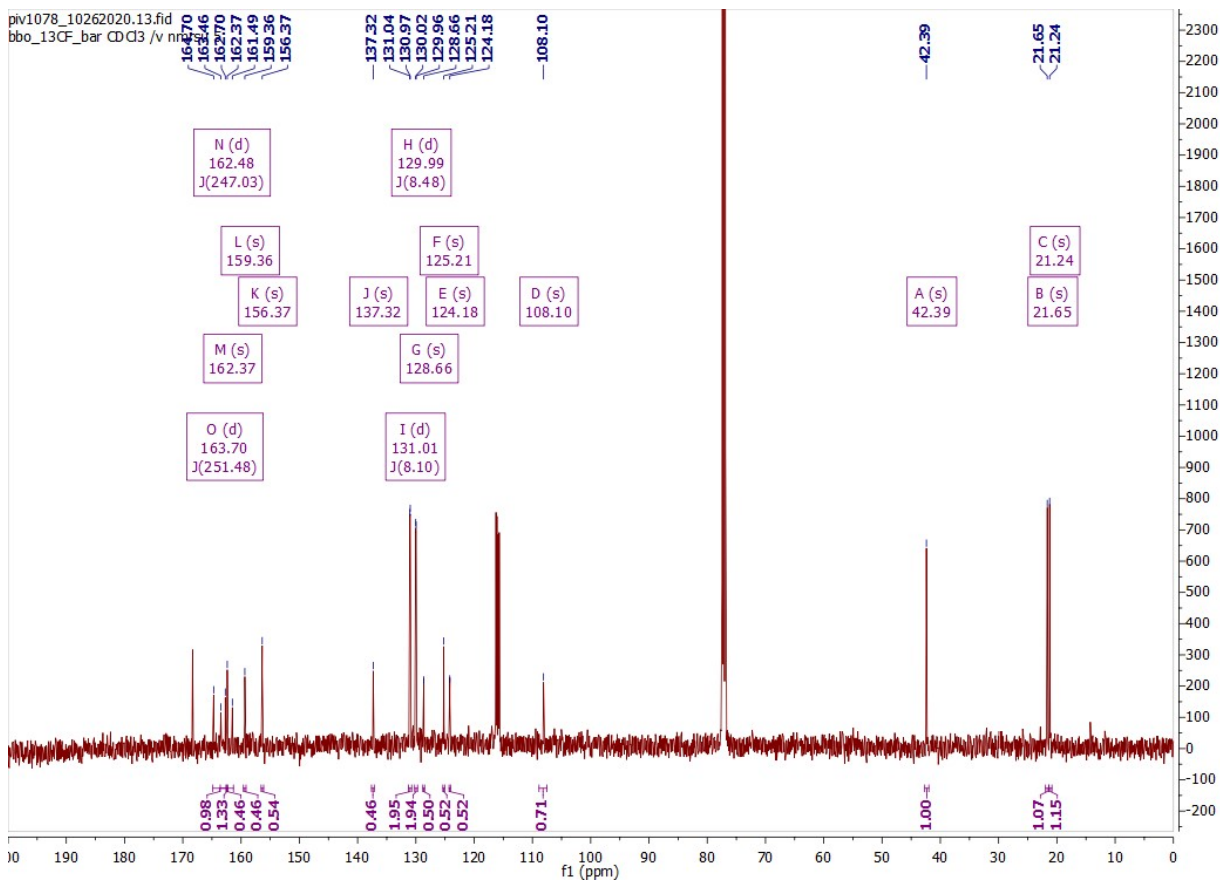

<sup>19</sup>F spectra of **8c**:

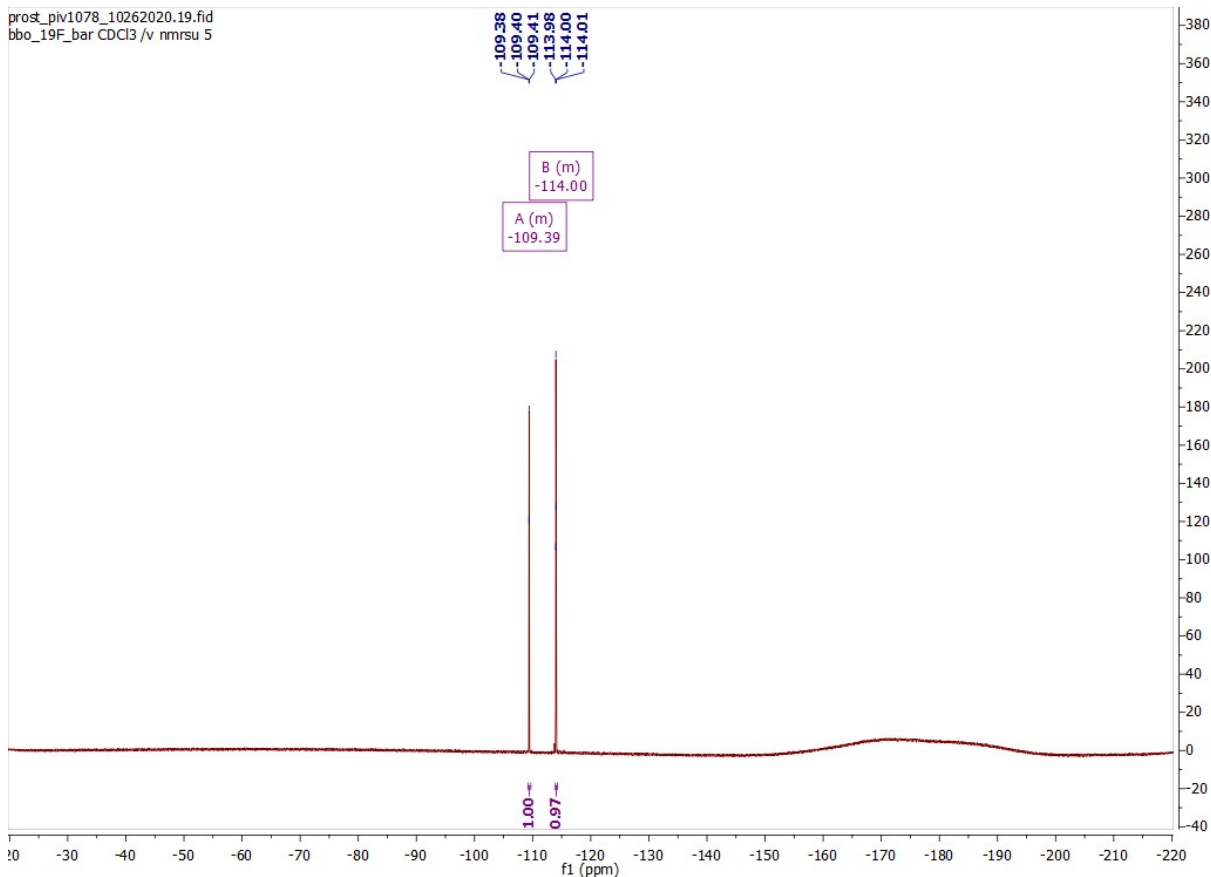

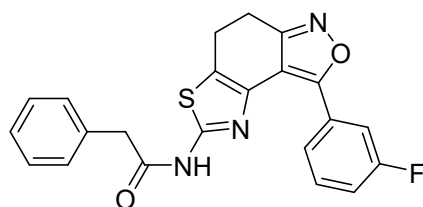

*N*-(8-(3-fluorophenyl)-4,5-dihydrothiazolo[4',5':3,4]benzo[1,2-c]isoxazol-2-yl)-2-phenylacetamide  
 Chemical Formula: C<sub>22</sub>H<sub>16</sub>FN<sub>3</sub>O<sub>2</sub>S  
 Exact Mass: 405,0947  
 Molecular Weight: 405,4474

**8d**

<sup>1</sup>H spectra of **8d**:

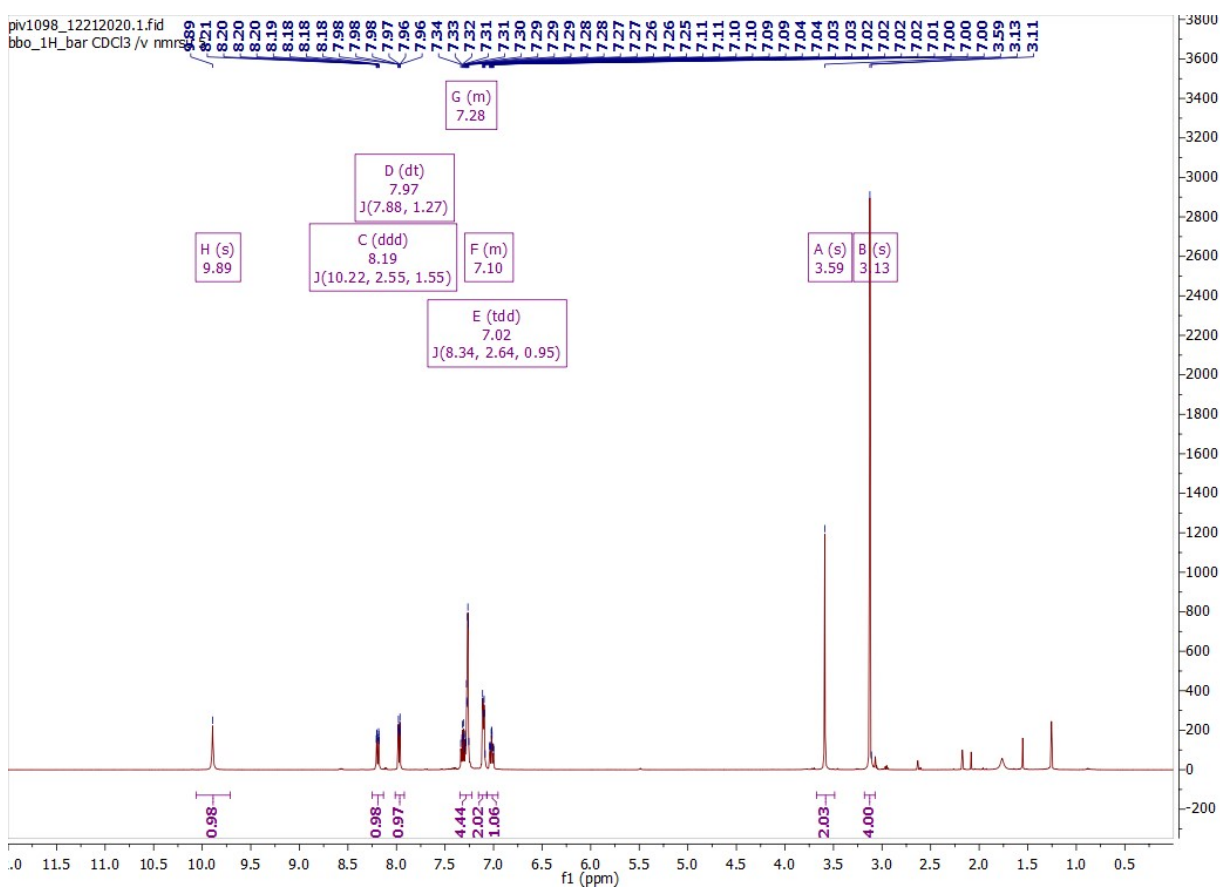

<sup>13</sup>C spectra of **8d**:

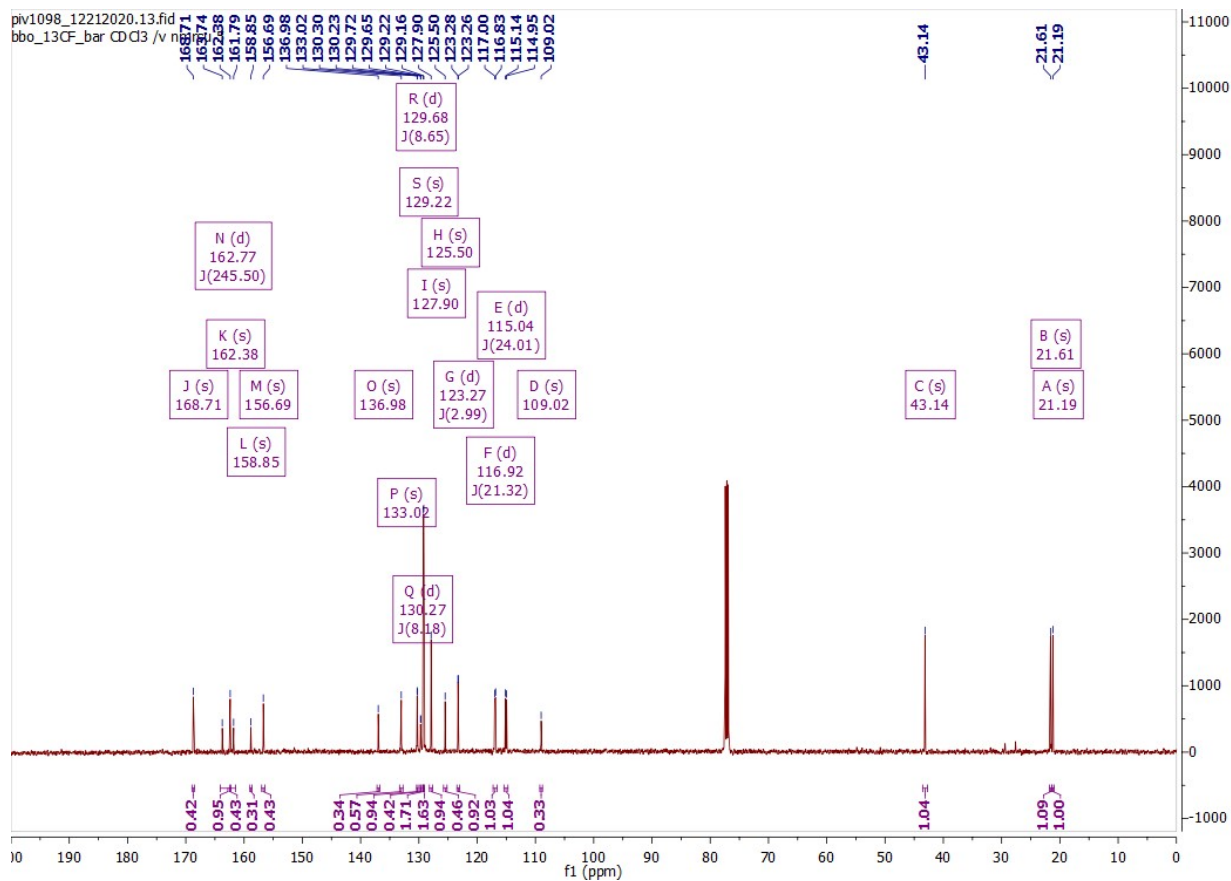

<sup>19</sup>F NMR spectra of **8d**:

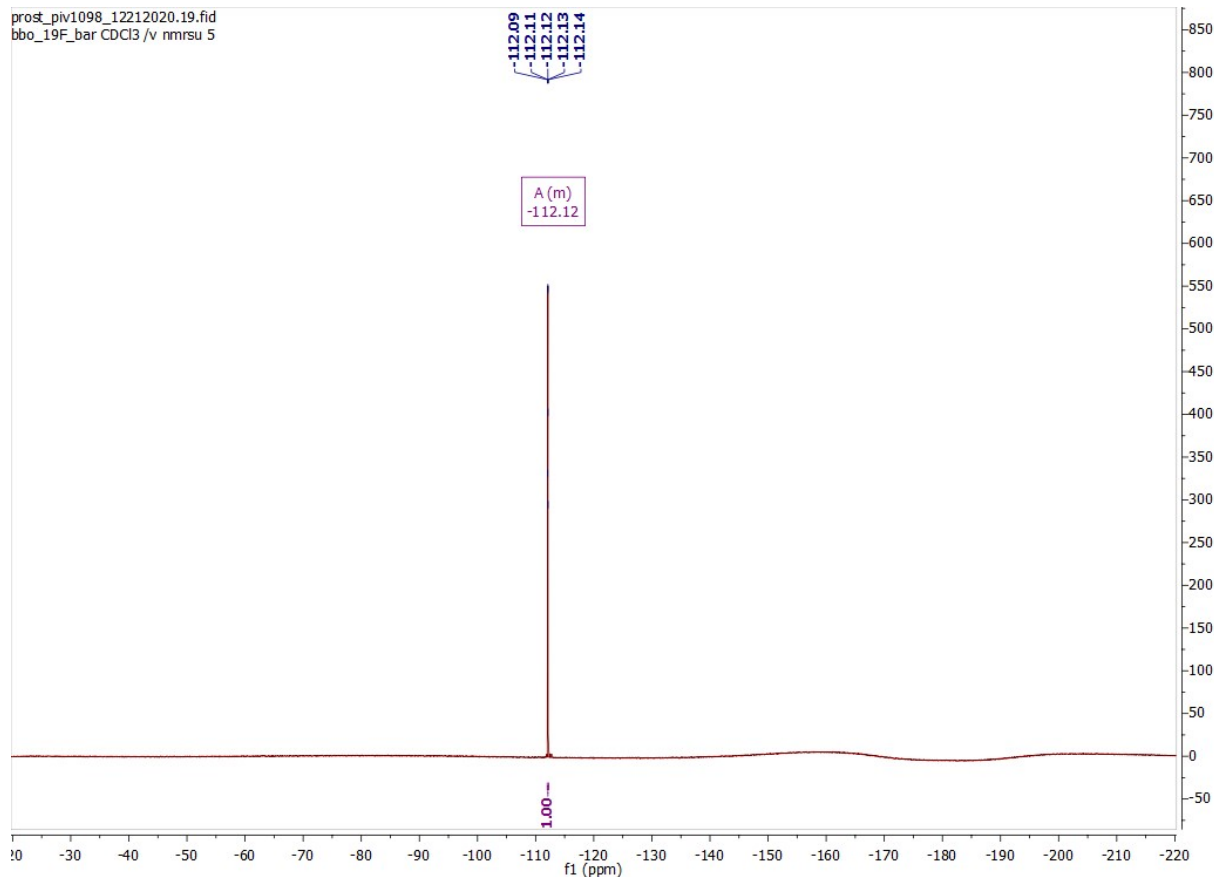

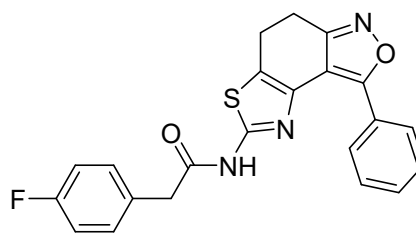

2-(4-fluorophenyl)-*N*-(8-phenyl-4,5-dihydrothiazolo[4',5':3,4]benzo[1,2-c]isoxazol-2-yl)acetamide

Chemical Formula: C<sub>22</sub>H<sub>16</sub>FN<sub>3</sub>O<sub>2</sub>S

Exact Mass: 405,0947

Molecular Weight: 405,4474

**8e**

<sup>1</sup>H spectra of **8e**:

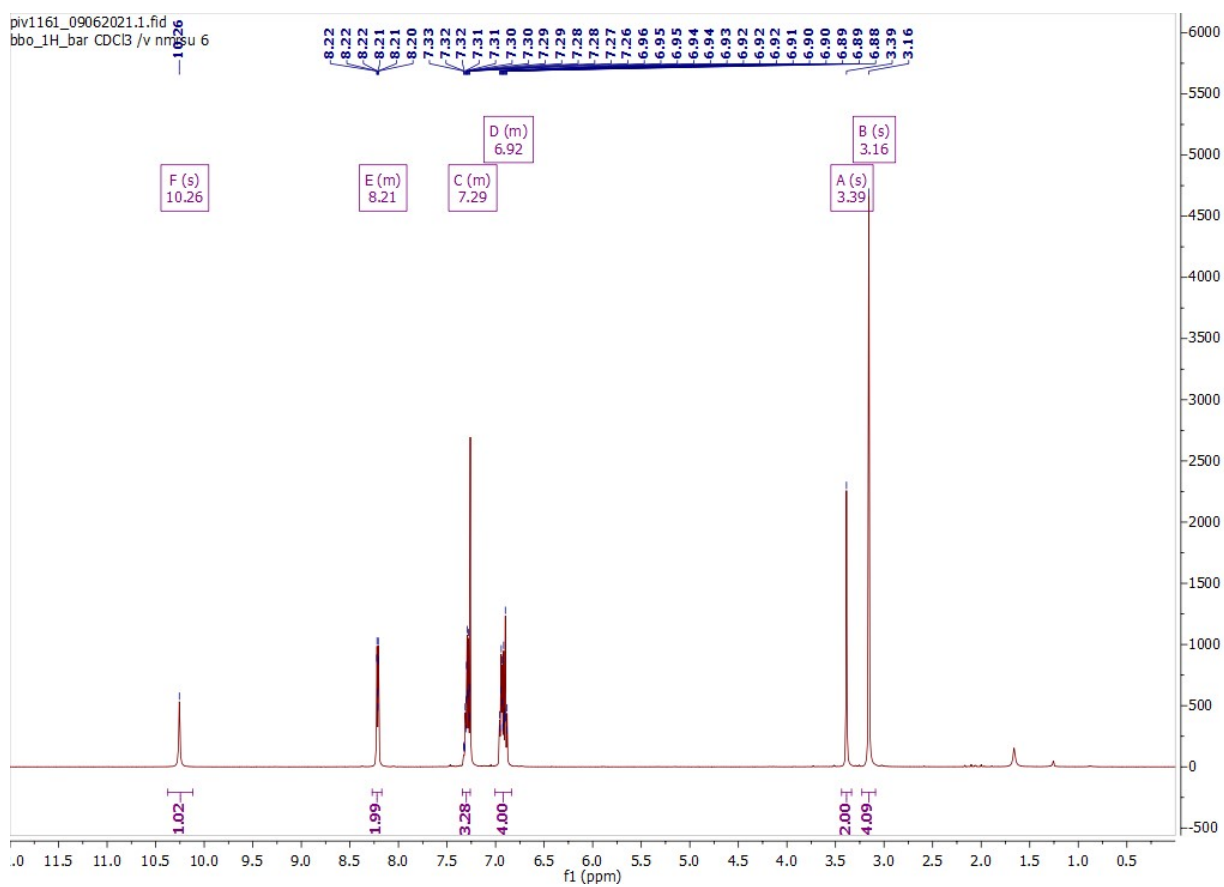

<sup>13</sup>C spectra of **8e**:

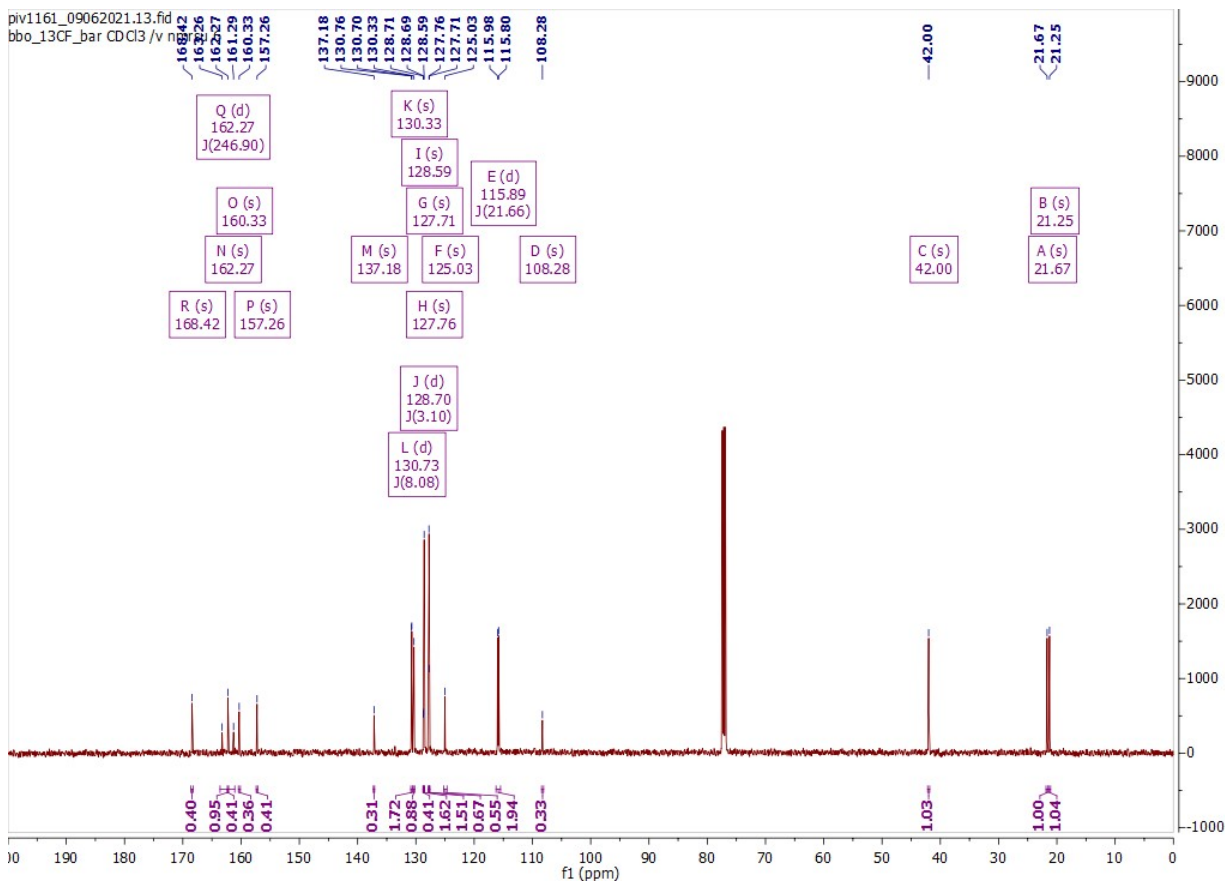

<sup>19</sup>F NMR spectra of **8e**:

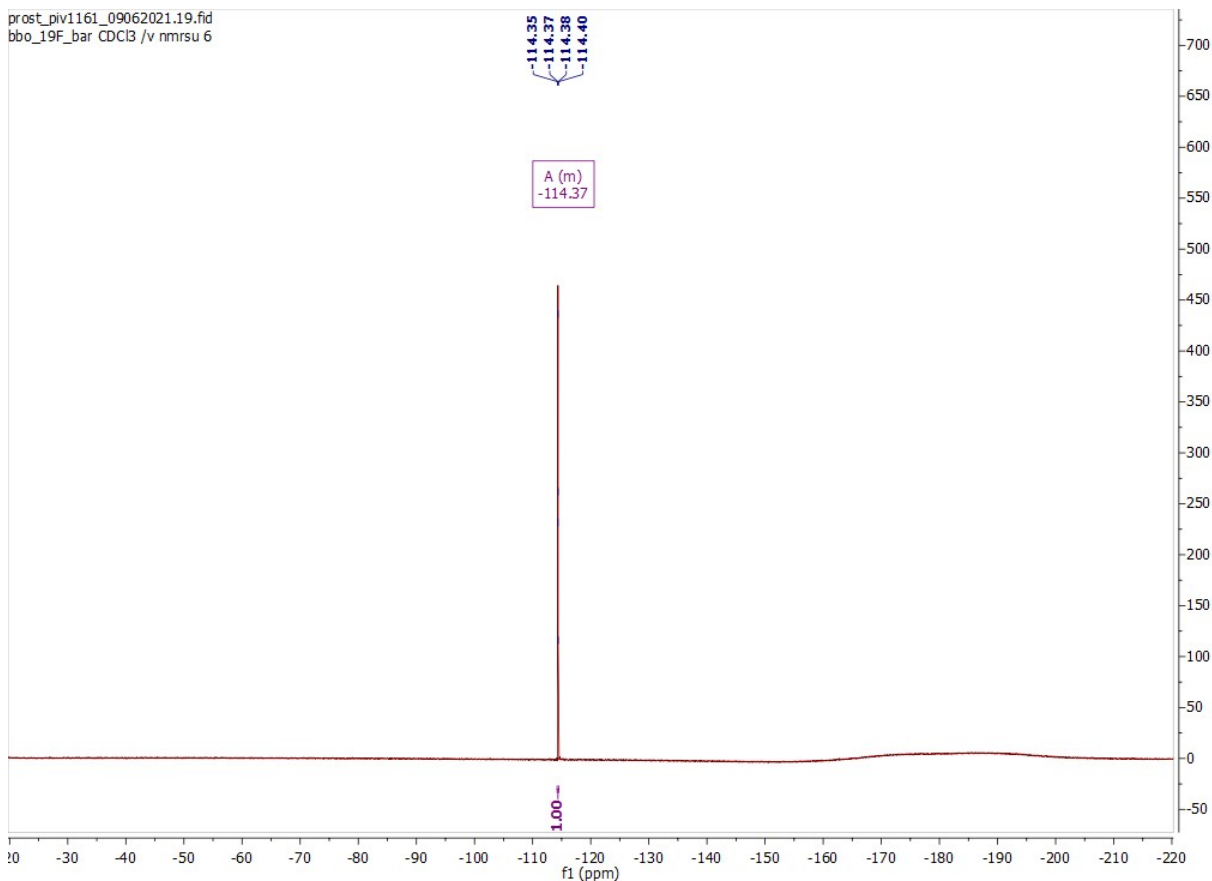



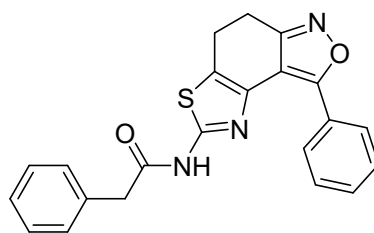

2-phenyl-*N*-(8-phenyl-4,5-dihydrothiazolo[4',5':3,4]benzo[1,2-*c*]isoxazol-2-yl)acetamide

Chemical Formula: C<sub>22</sub>H<sub>17</sub>N<sub>3</sub>O<sub>2</sub>S

Exact Mass: 387,1041

Molecular Weight: 387,4570

**8f**

<sup>1</sup>H spectra of **8f**:

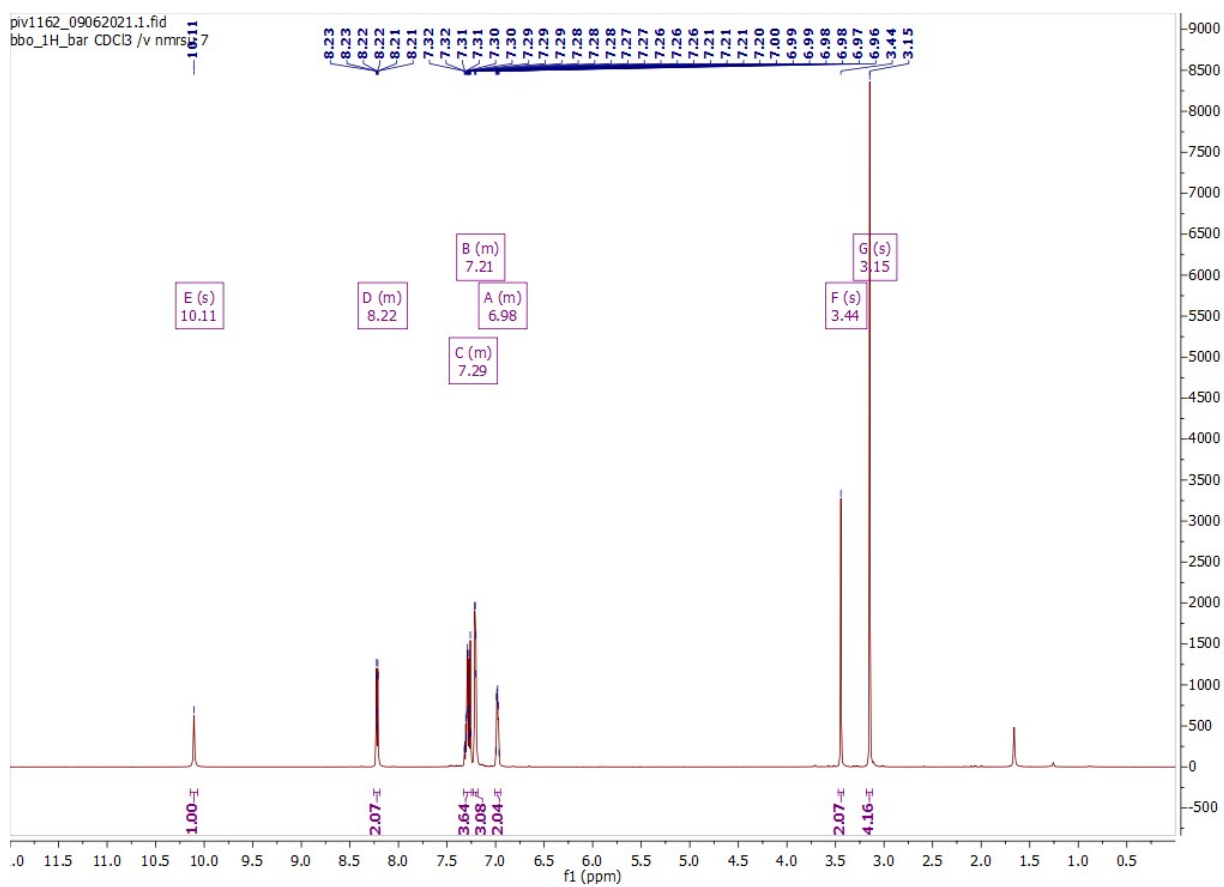

<sup>1</sup>H spectra of **8f**:

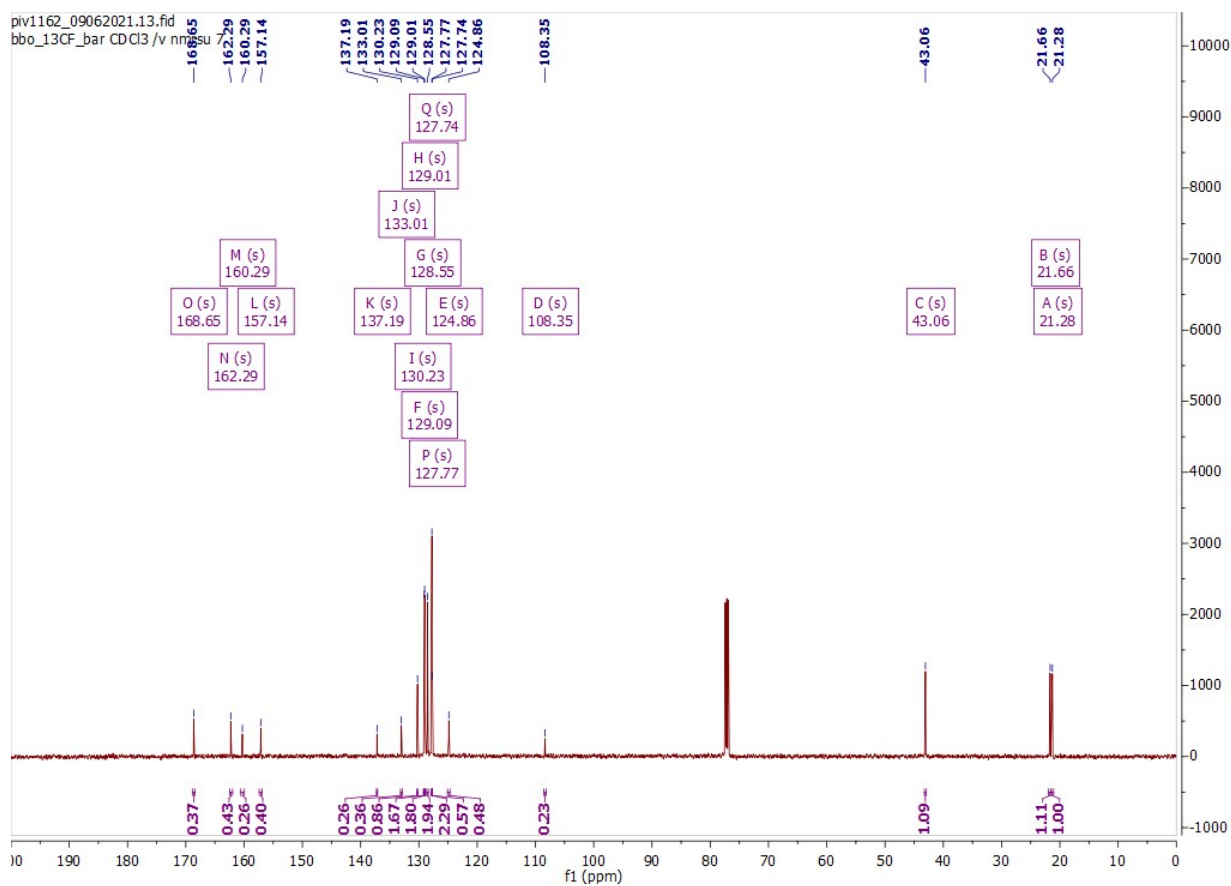

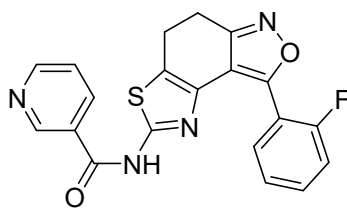

*N*-(8-(2-fluorophenyl)-4,5-dihydrothiazolo[4',5':3,4]benzo[1,2-*c*]isoxazol-2-yl)nicotinamide

Chemical Formula: C<sub>20</sub>H<sub>13</sub>FN<sub>4</sub>O<sub>2</sub>S

Exact Mass: 392,0743

Molecular Weight: 392,4084

**8g**

<sup>1</sup>H spectra of **8g**:

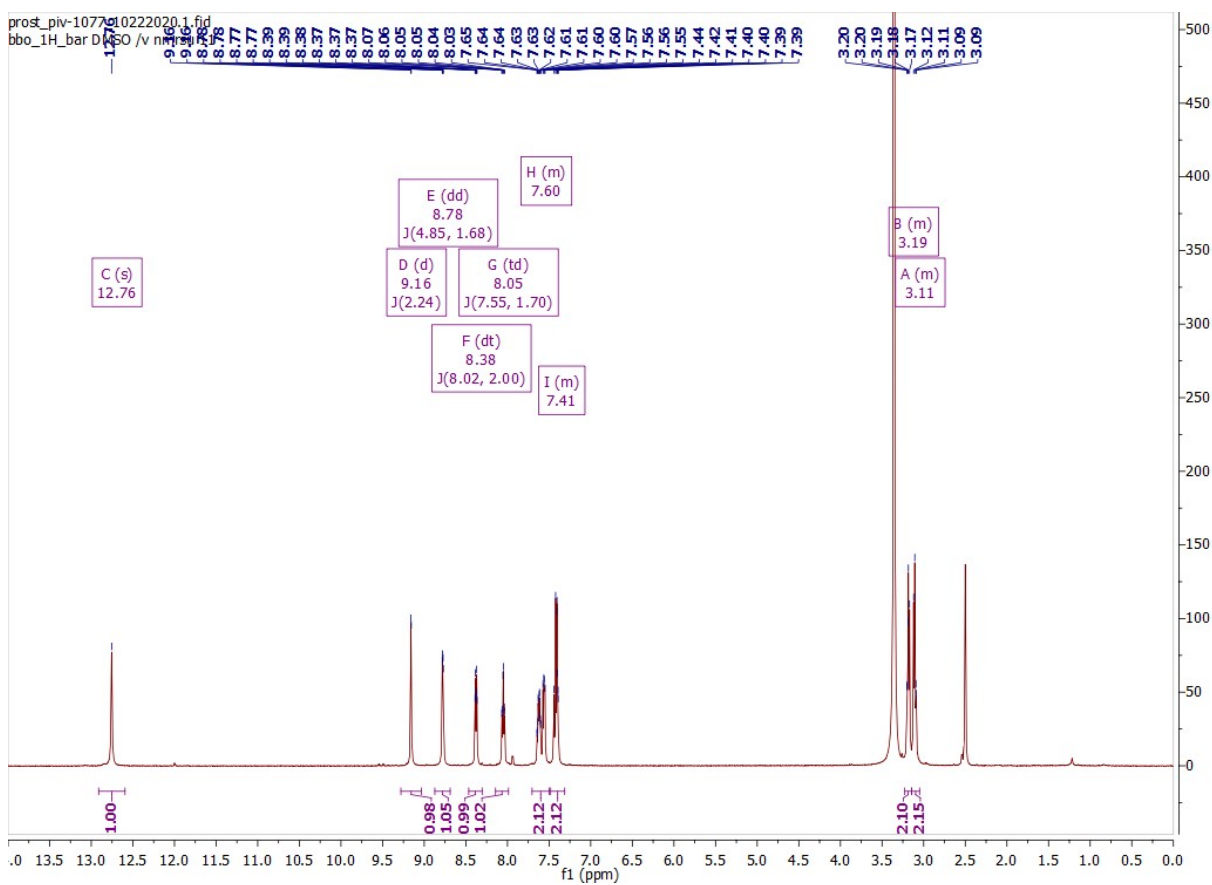

<sup>13</sup>C spectra of **8g**:

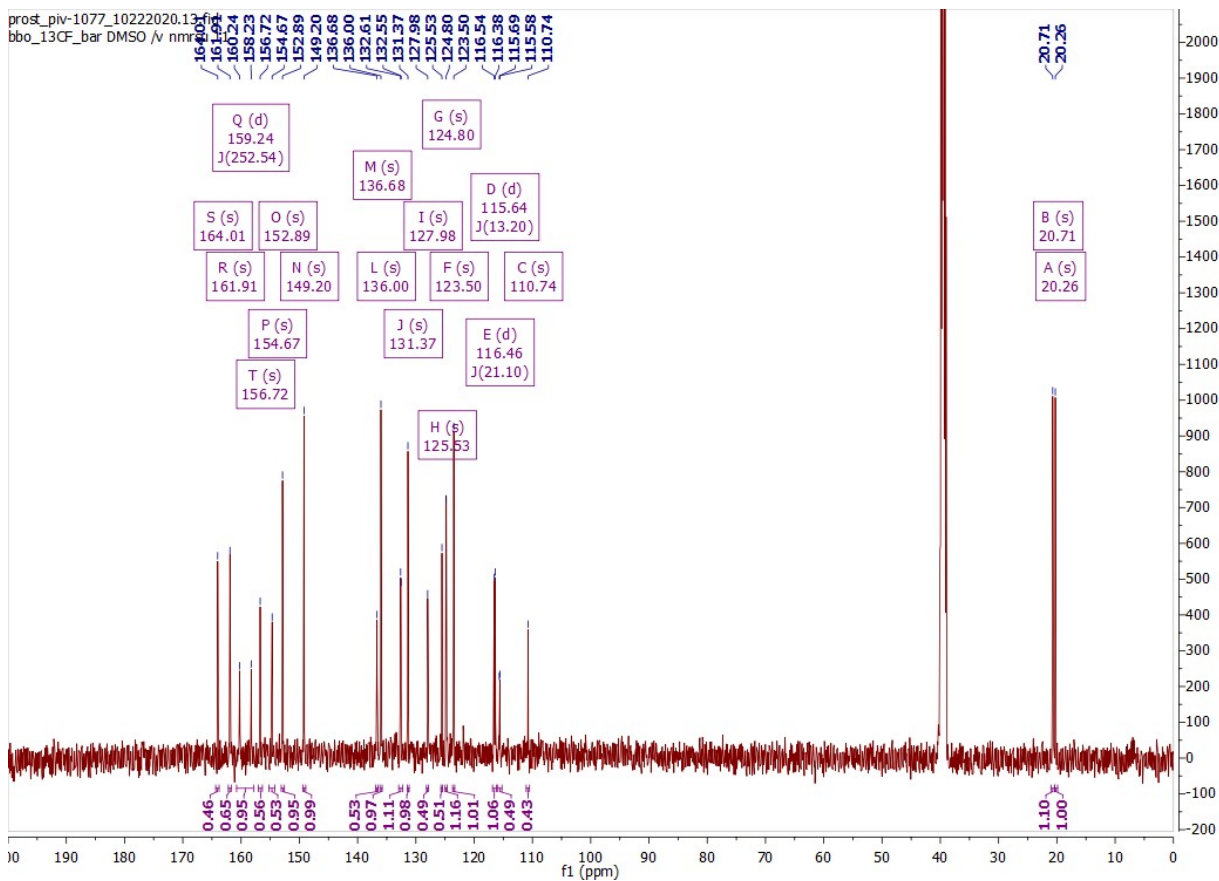

<sup>19</sup>F NMR spectra of **8g**:

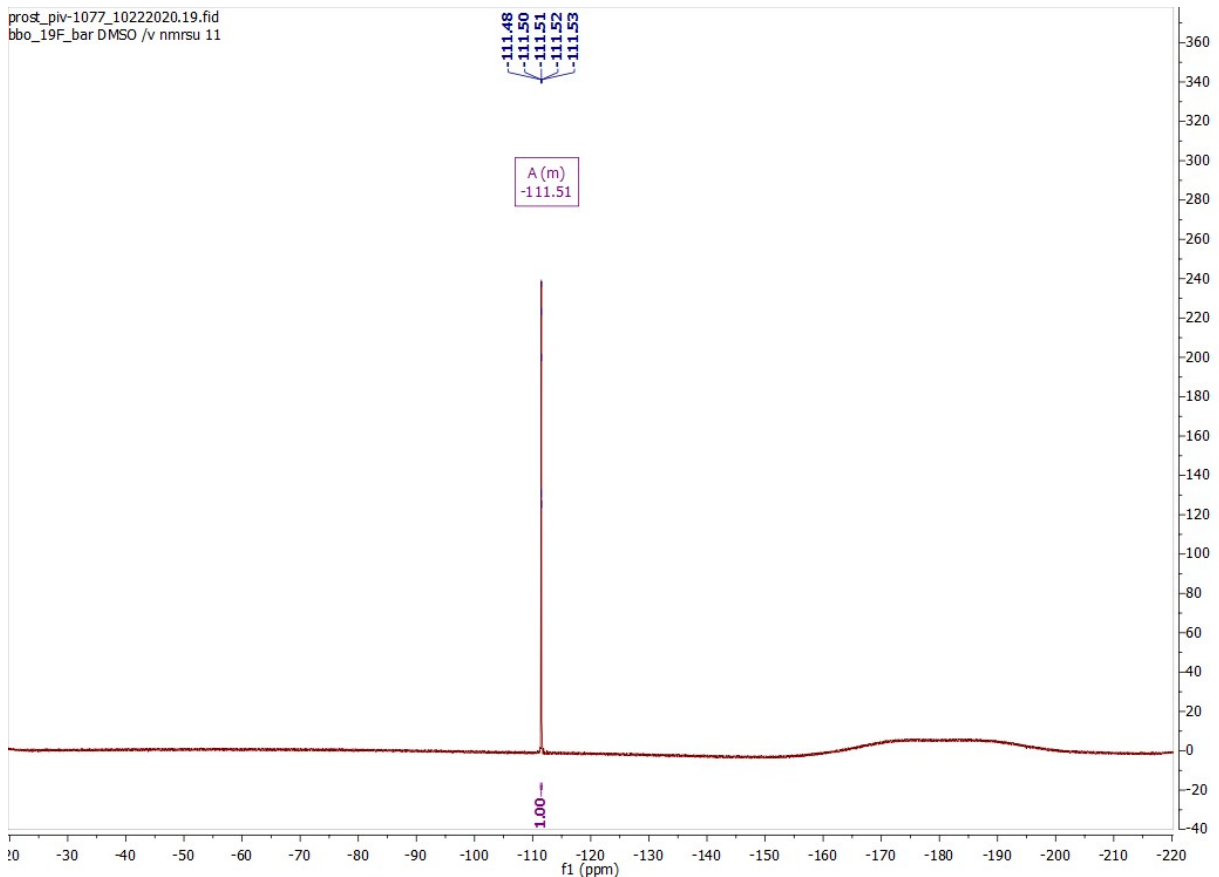

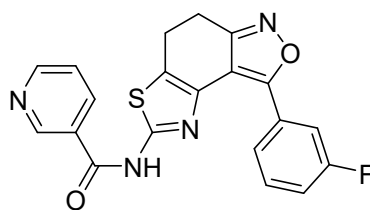

*N*-(8-(3-fluorophenyl)-4,5-dihydrothiazolo[4',5':3,4]benzo[1,2-*c*]isoxazol-2-yl)nicotinamide

Chemical Formula: C<sub>20</sub>H<sub>13</sub>FN<sub>4</sub>O<sub>2</sub>S

Molecular Weight: 392,41

### 8h

<sup>1</sup>H spectra of 8h:

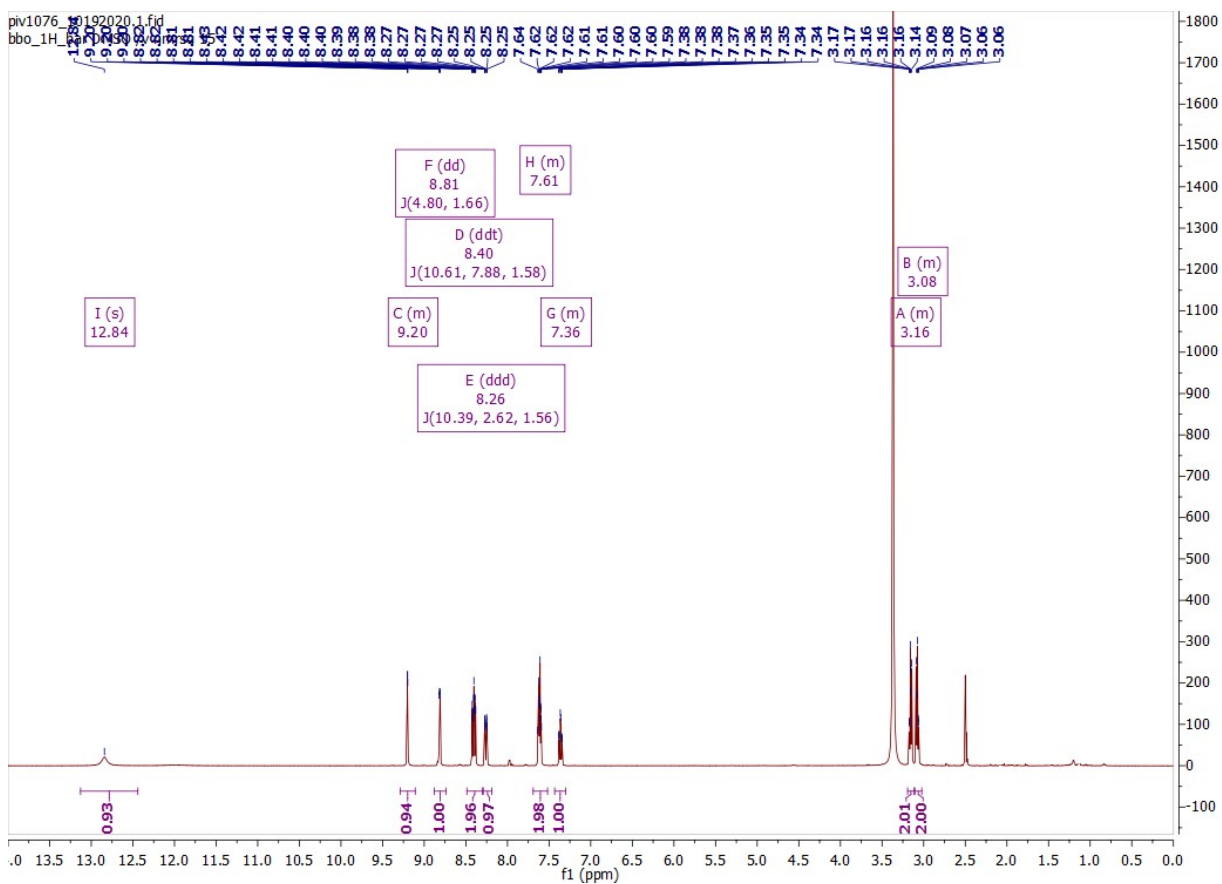

<sup>13</sup>C spectra of **8h**:

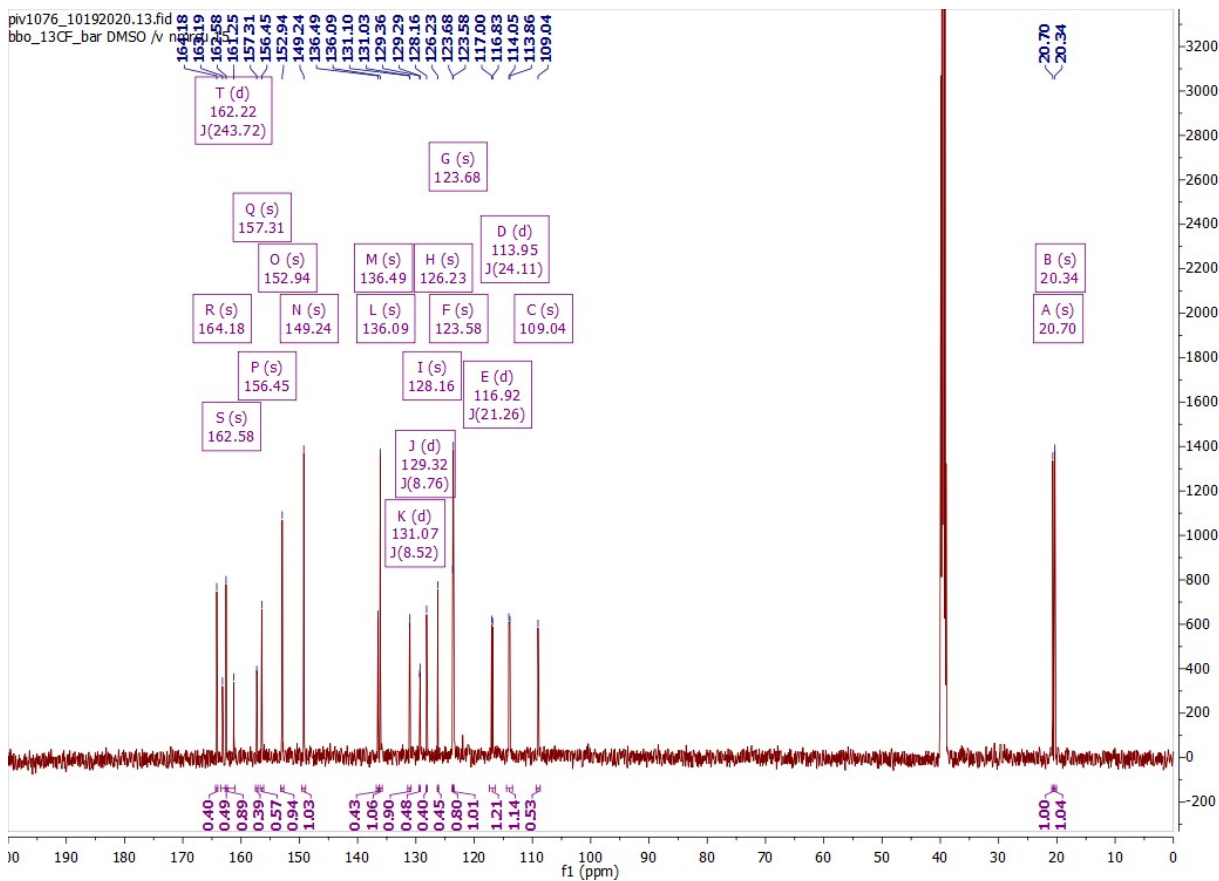

<sup>19</sup>F spectra of **8h**:

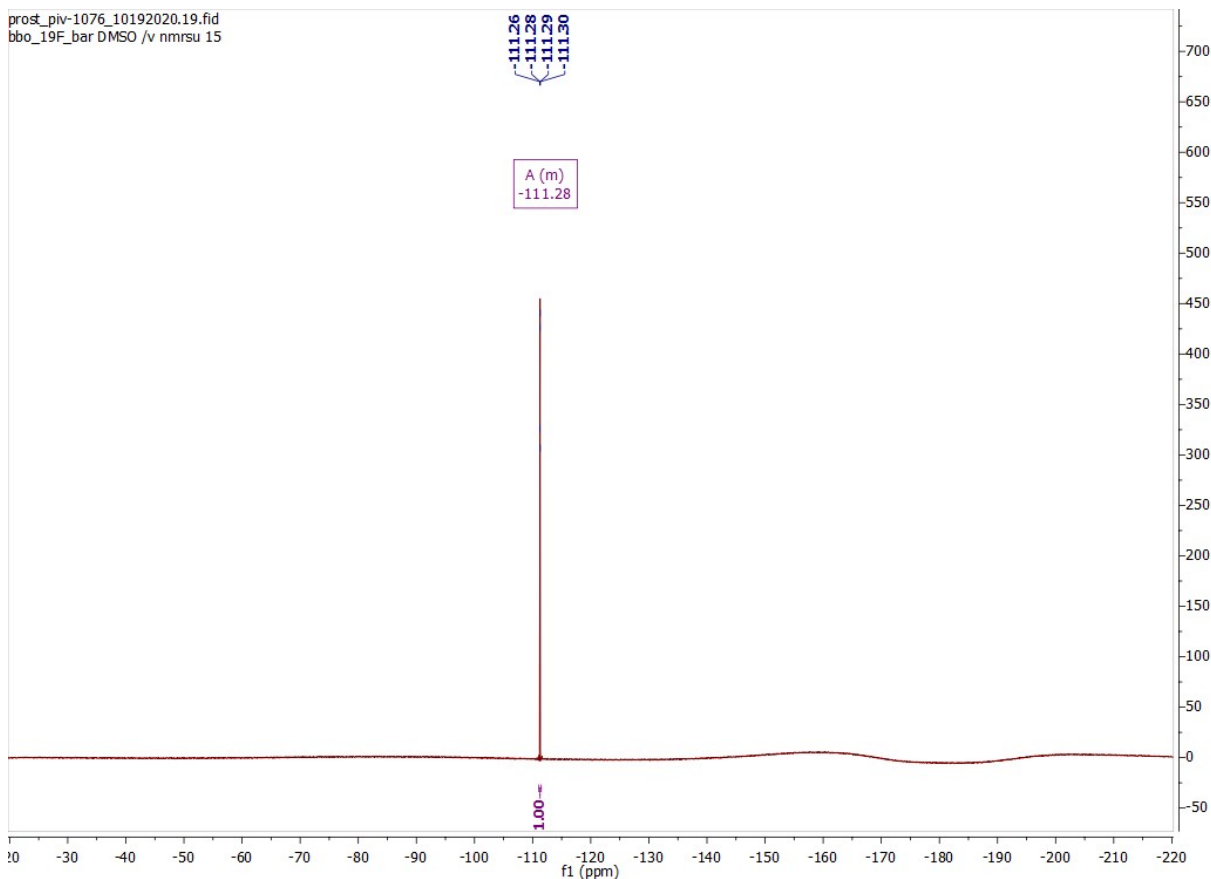

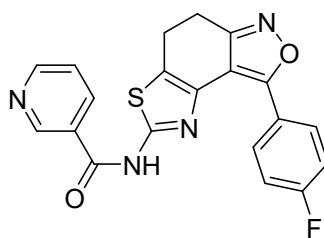

*N*-(8-(4-fluorophenyl)-4,5-dihydrothiazolo[4',5':3,4]benzo[1,2-*c*]isoxazol-2-yl)nicotinamide

Chemical Formula: C<sub>20</sub>H<sub>13</sub>FN<sub>4</sub>O<sub>2</sub>S

Molecular Weight: 392,41

**8i**

<sup>1</sup>H spectra of **8i**:

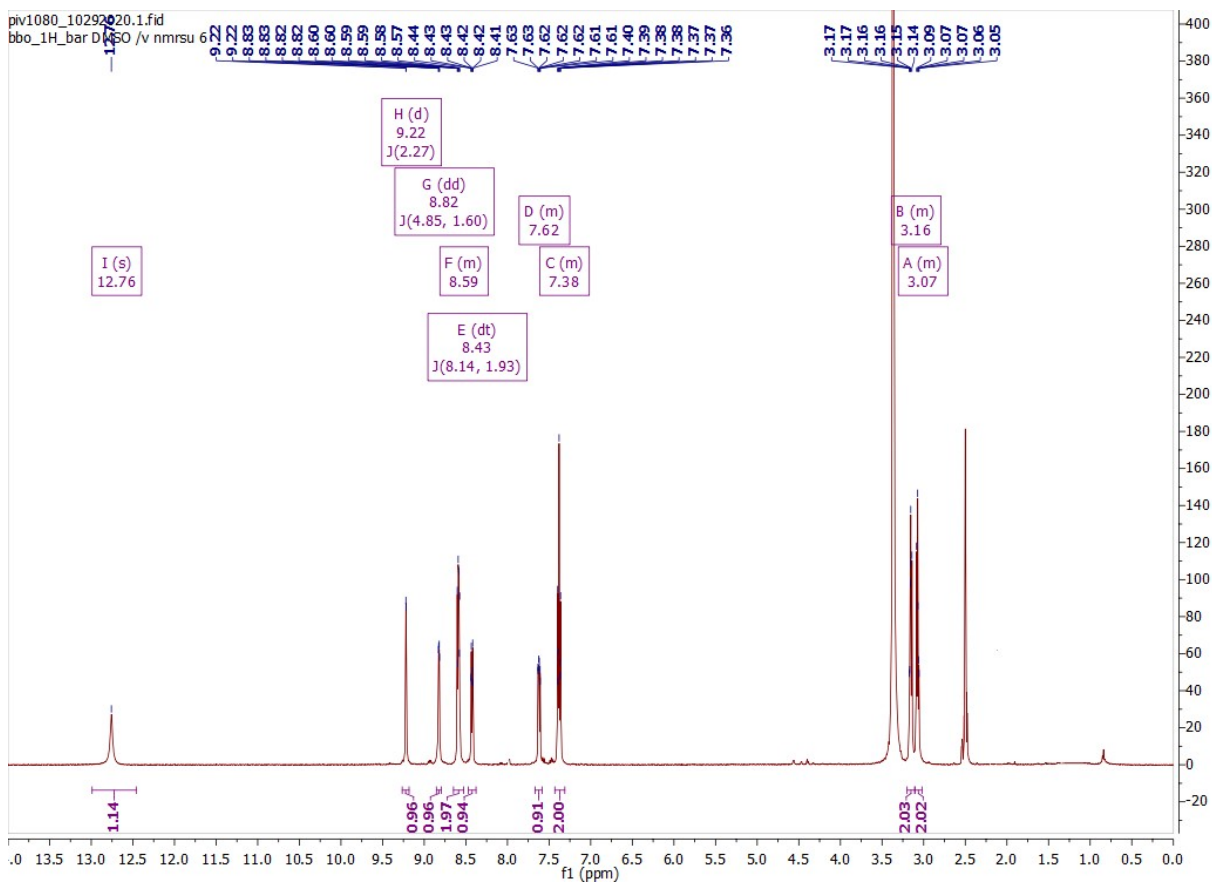

<sup>13</sup>C spectra of **8i**:

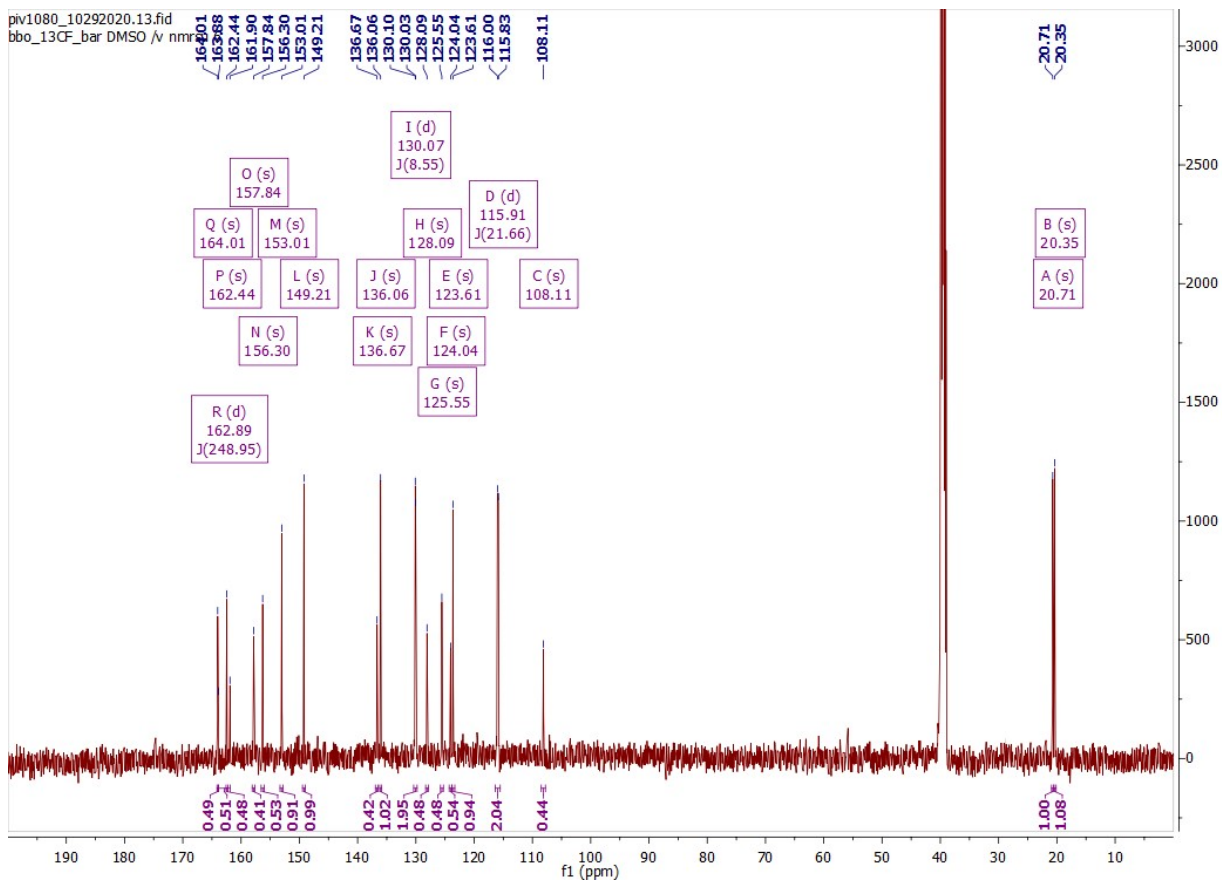

<sup>19</sup>F spectra of **8i**:

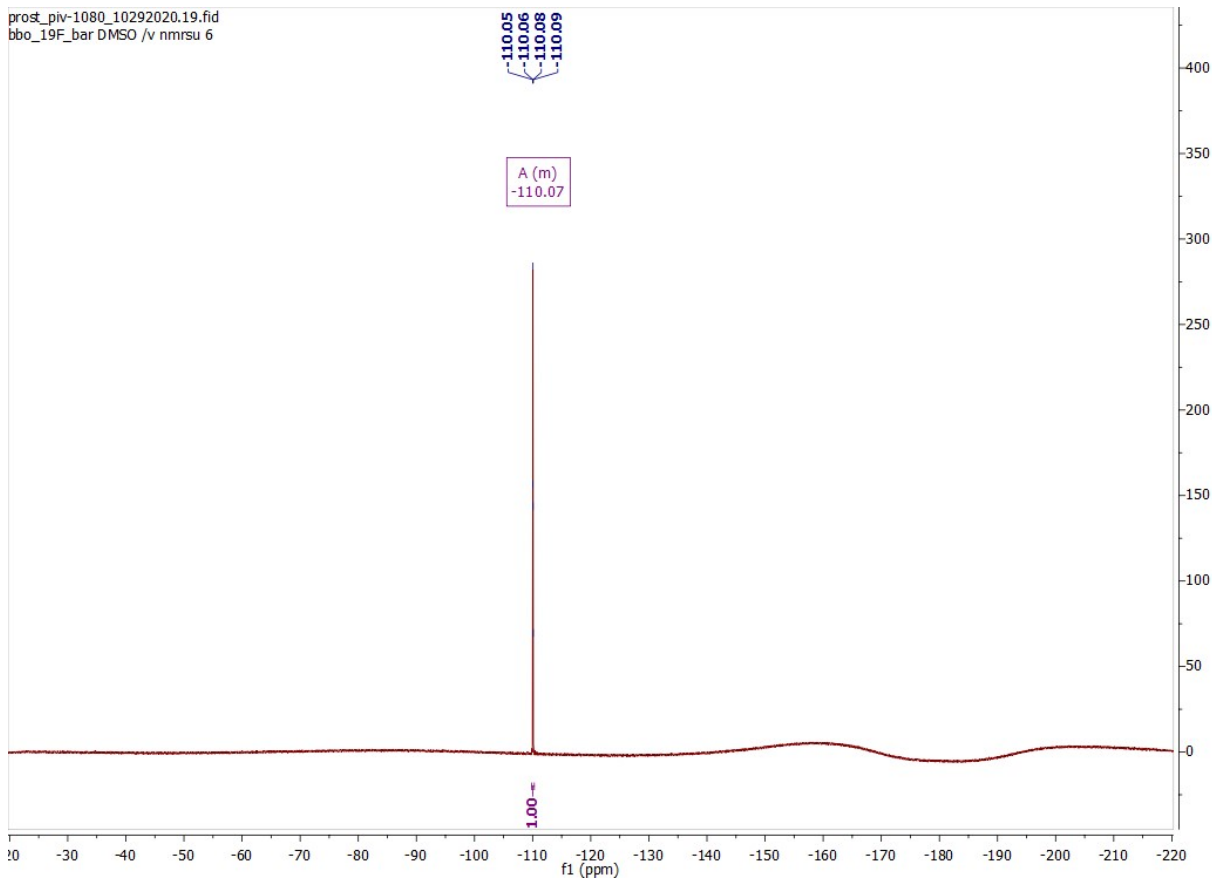



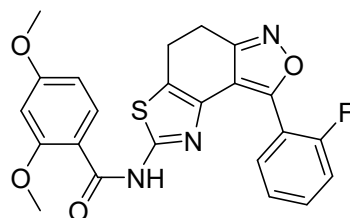

*N*-(8-(2-fluorophenyl)-4,5-dihydrothiazolo[4',5':3,4]benzo[1,2-*c*]isoxazol-2-yl)-2,4-dimethoxybenzamide

Chemical Formula: C<sub>23</sub>H<sub>18</sub>FN<sub>3</sub>O<sub>4</sub>S

Exact Mass: 451,1002

Molecular Weight: 451,4724

**8j**

<sup>1</sup>H spectra of **8j**:

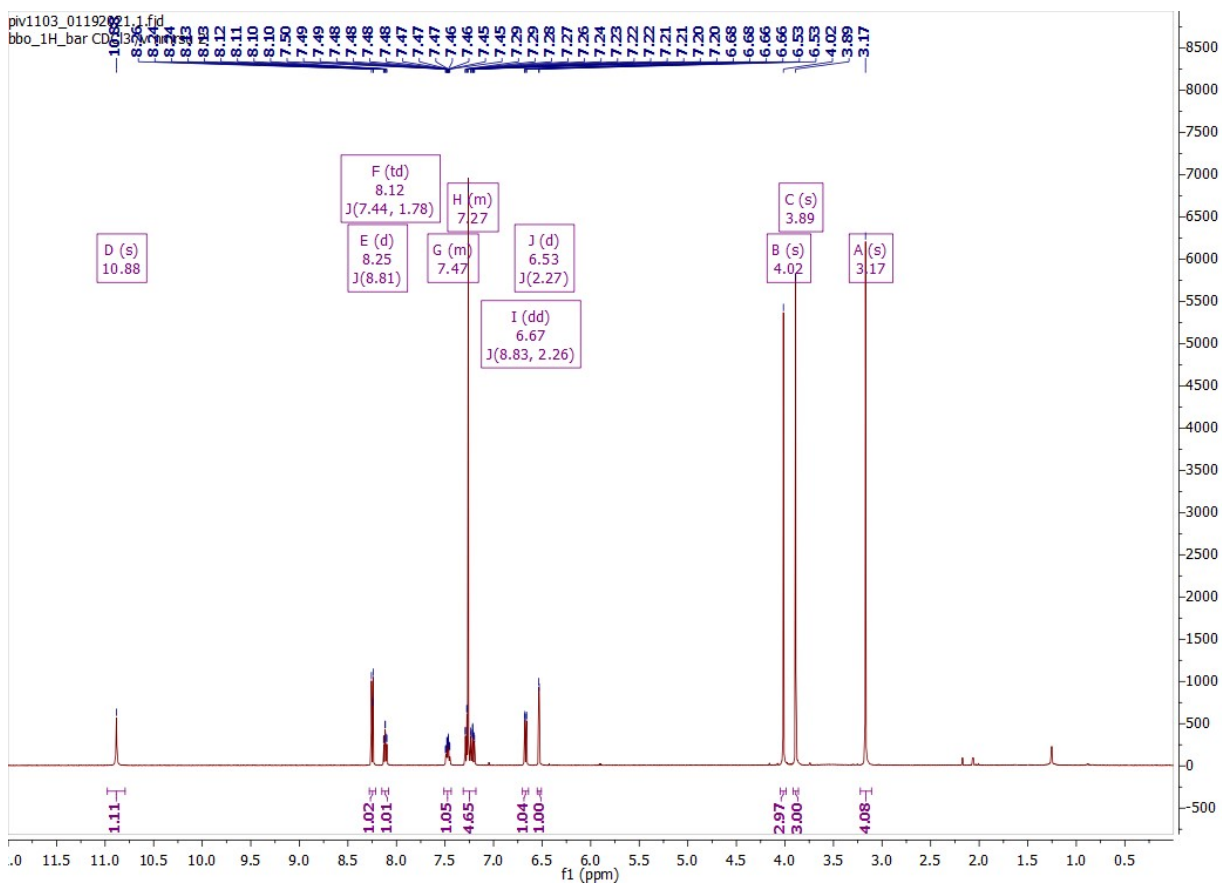

<sup>13</sup>C spectra of **8j**:

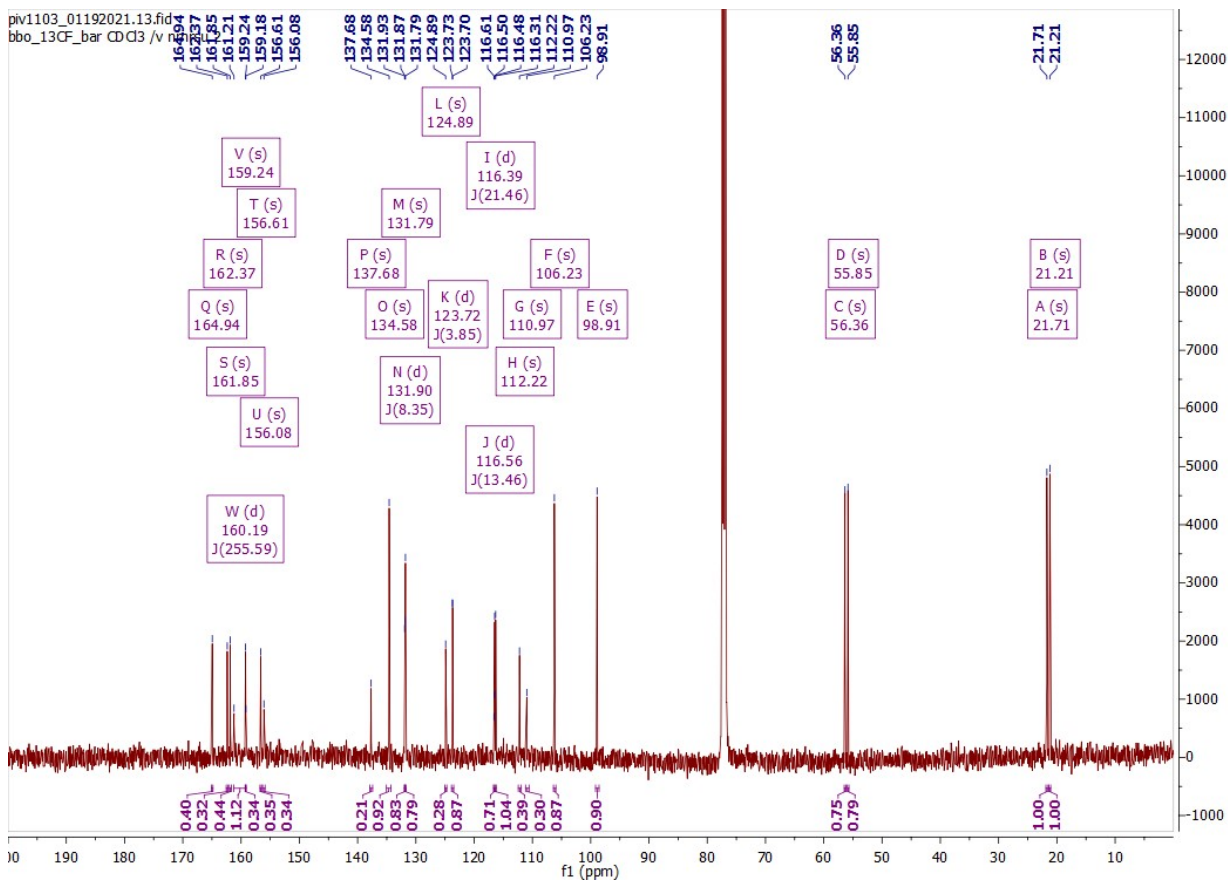

<sup>19</sup>F NMR spectra of **8j**:

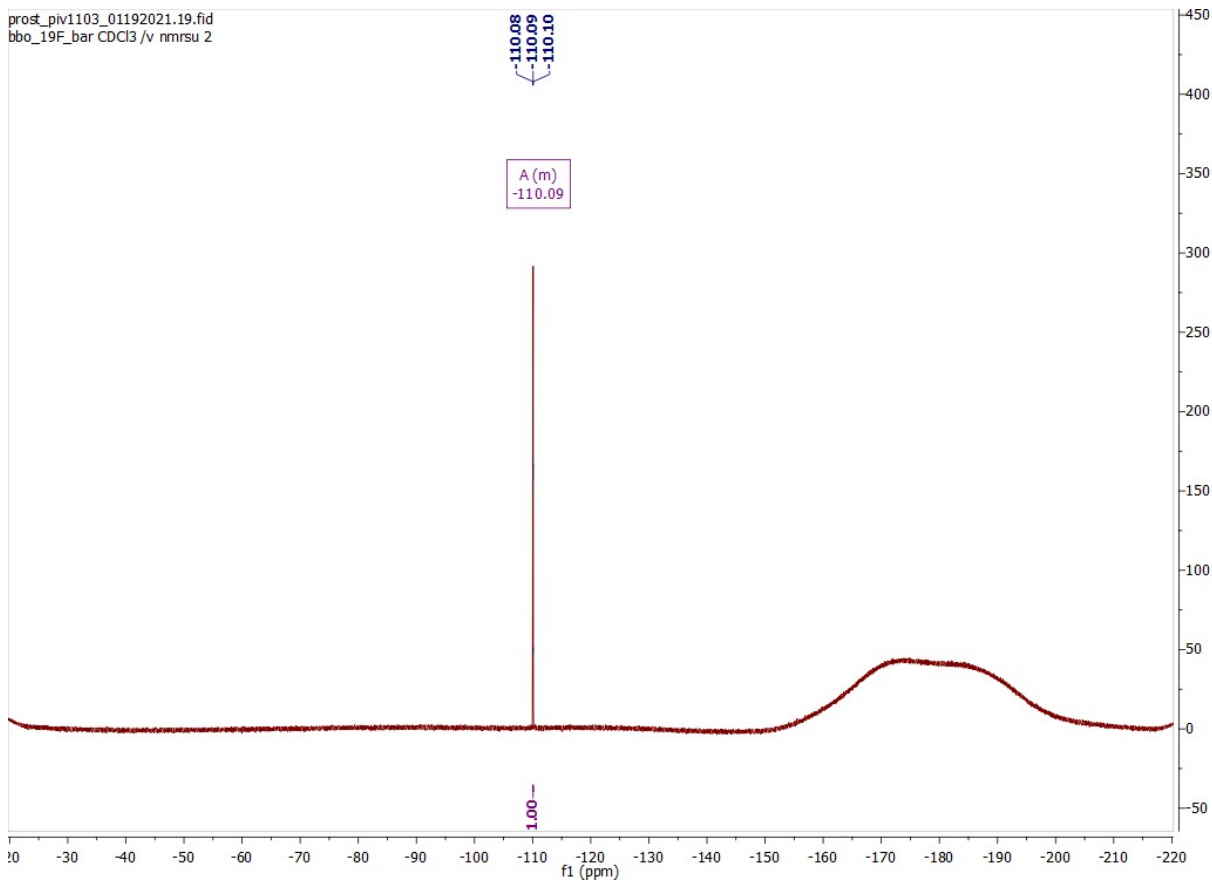

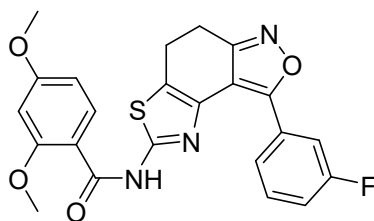

*N*-(8-(3-fluorophenyl)-4,5-dihydrothiazolo[4',5':3,4]benzo[1,2-*c*]isoxazol-2-yl)-2,4-dimethoxybenzamide

Chemical Formula: C<sub>23</sub>H<sub>18</sub>FN<sub>3</sub>O<sub>4</sub>S

Molecular Weight: 451,47

**8k**

<sup>1</sup>H spectra of **8k**:

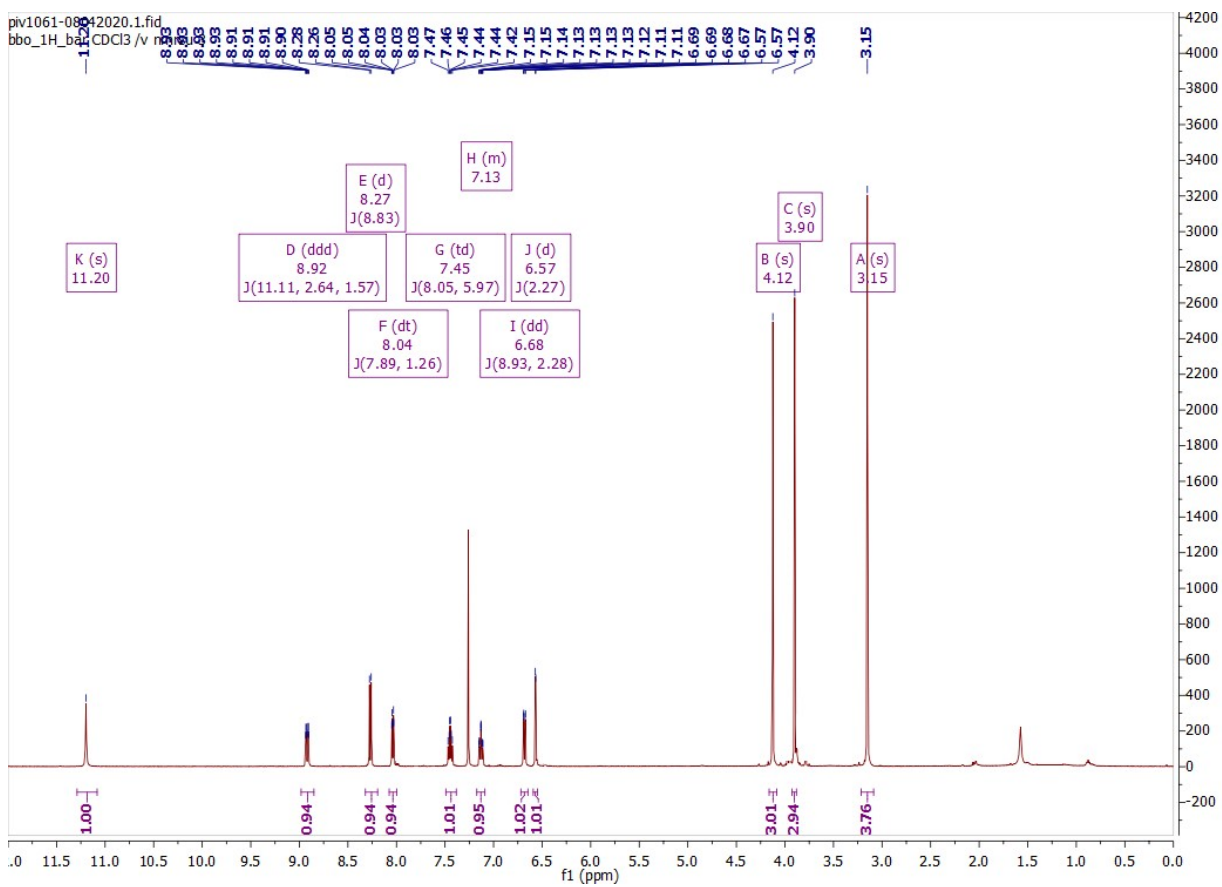

<sup>13</sup>C spectra of **8k**:

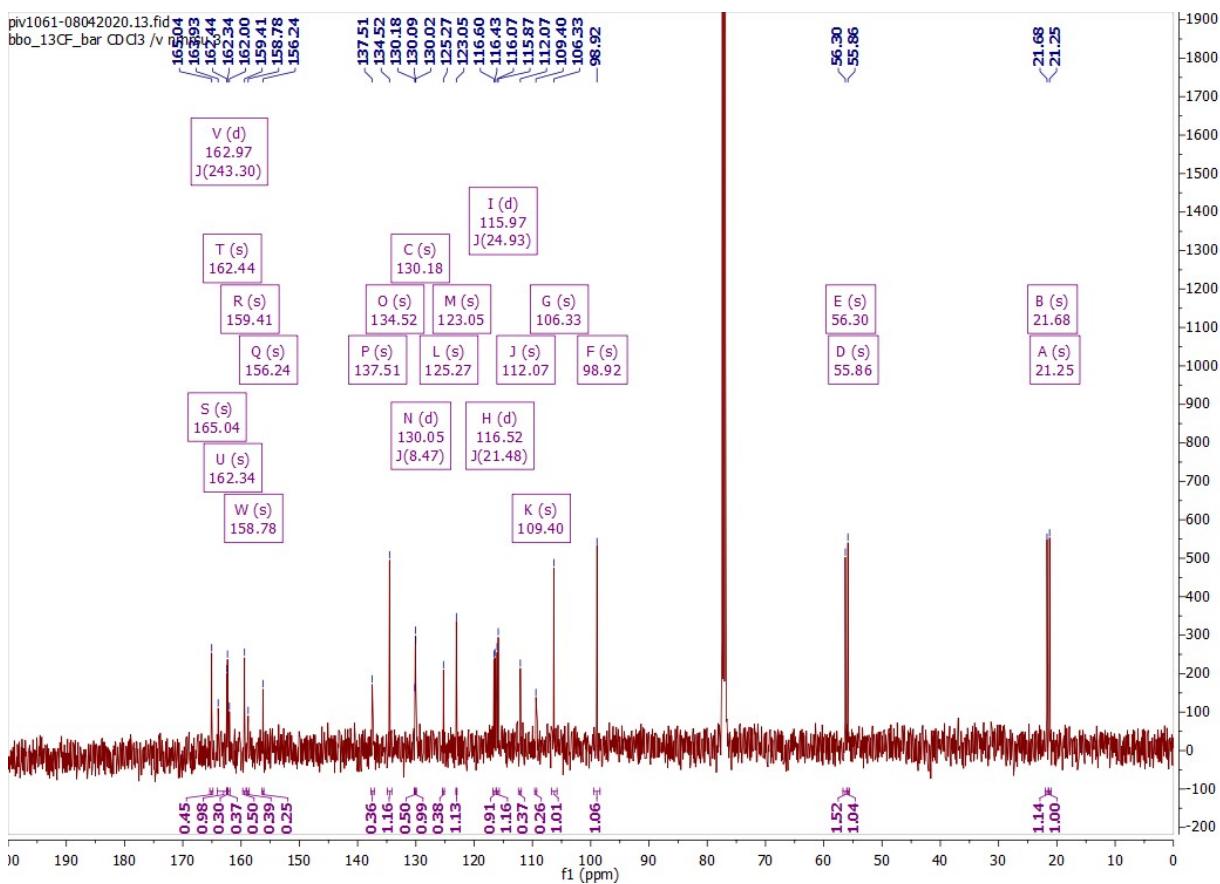

<sup>19</sup>F spectra of **8k**:

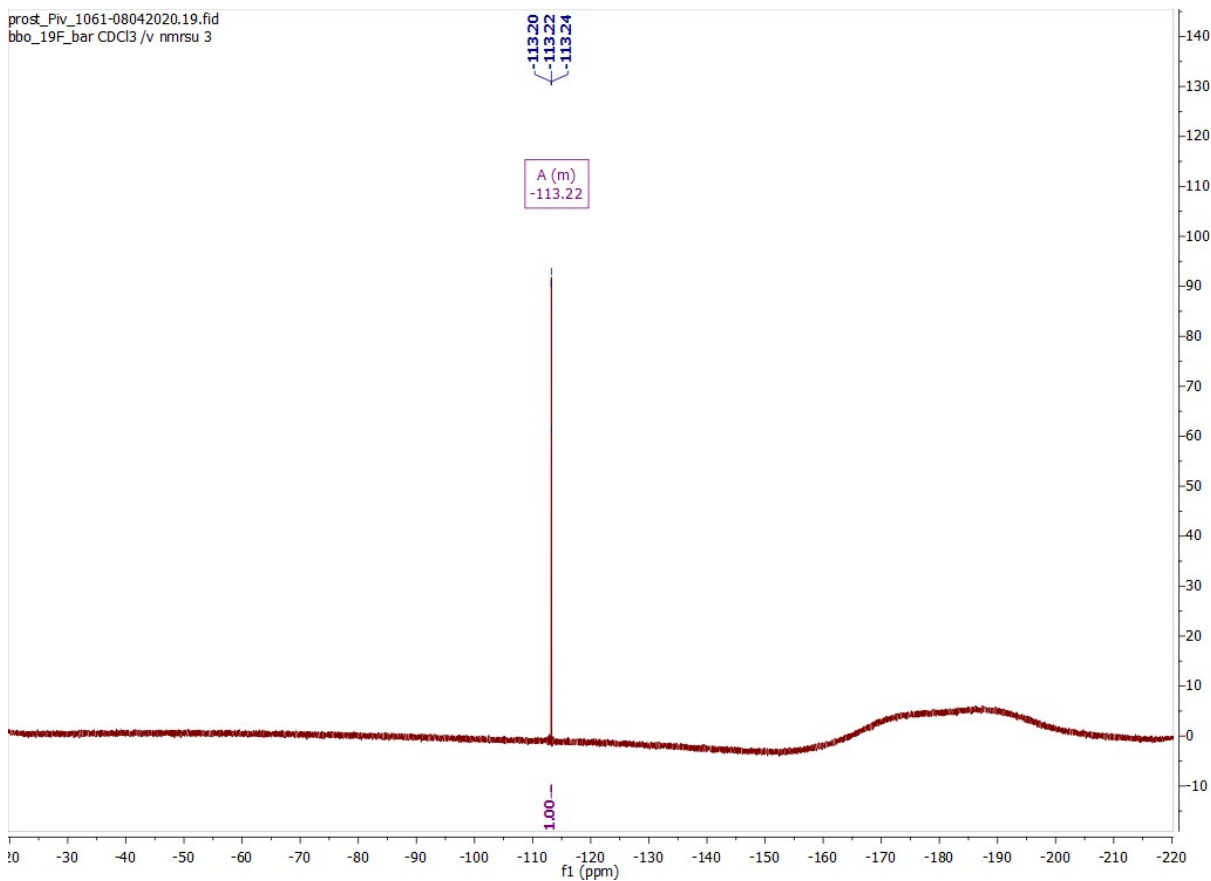

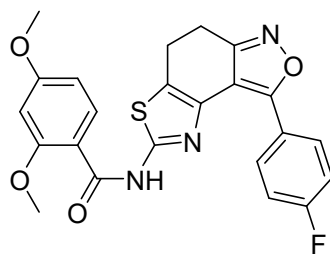

*N*-(8-(4-fluorophenyl)-4,5-dihydrothiazolo[4',5':3,4]benzo[1,2-*c*]isoxazol-2-yl)-2,4-dimethoxybenzamide  
 Chemical Formula: C<sub>23</sub>H<sub>18</sub>FN<sub>3</sub>O<sub>4</sub>S  
 Molecular Weight: 451,4724

**81**

<sup>1</sup>H spectra of **81**:

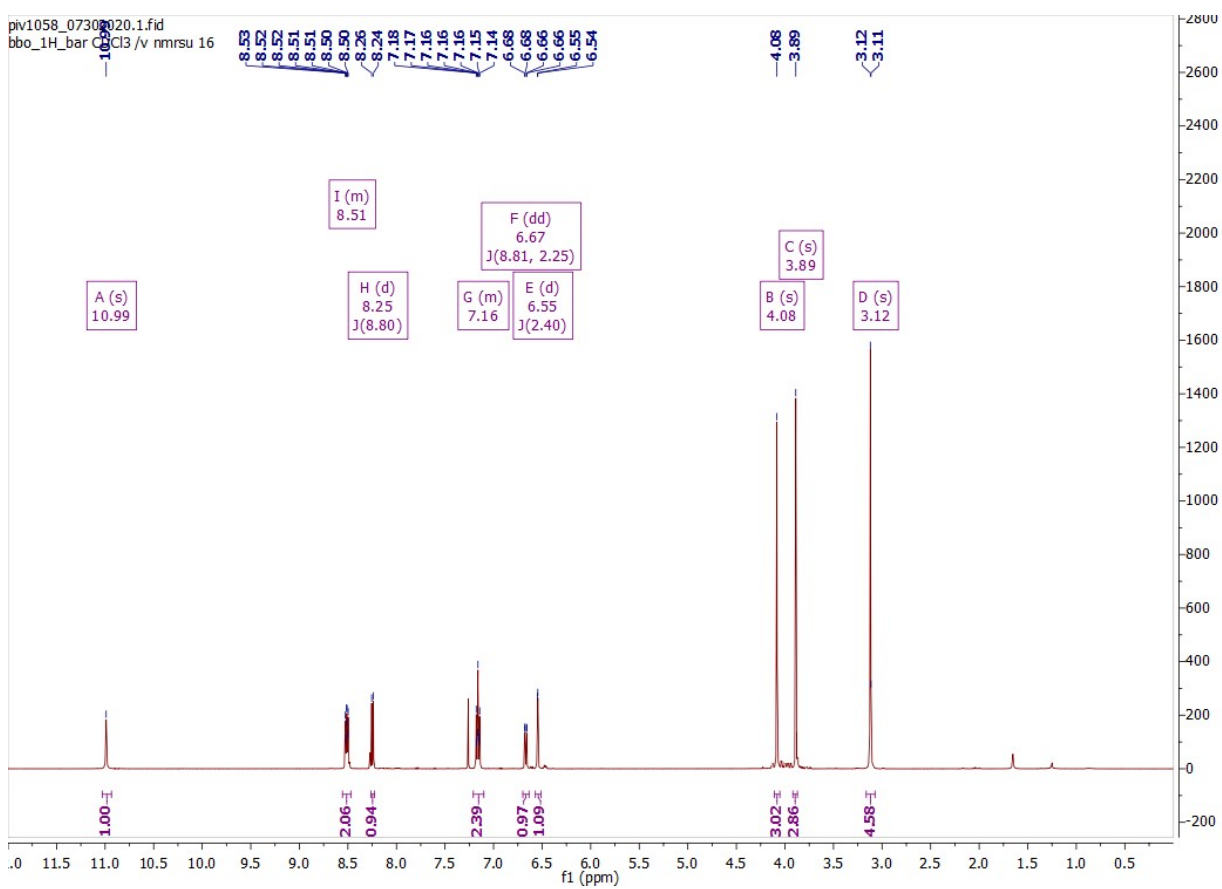

<sup>13</sup>C spectra of **8l**:

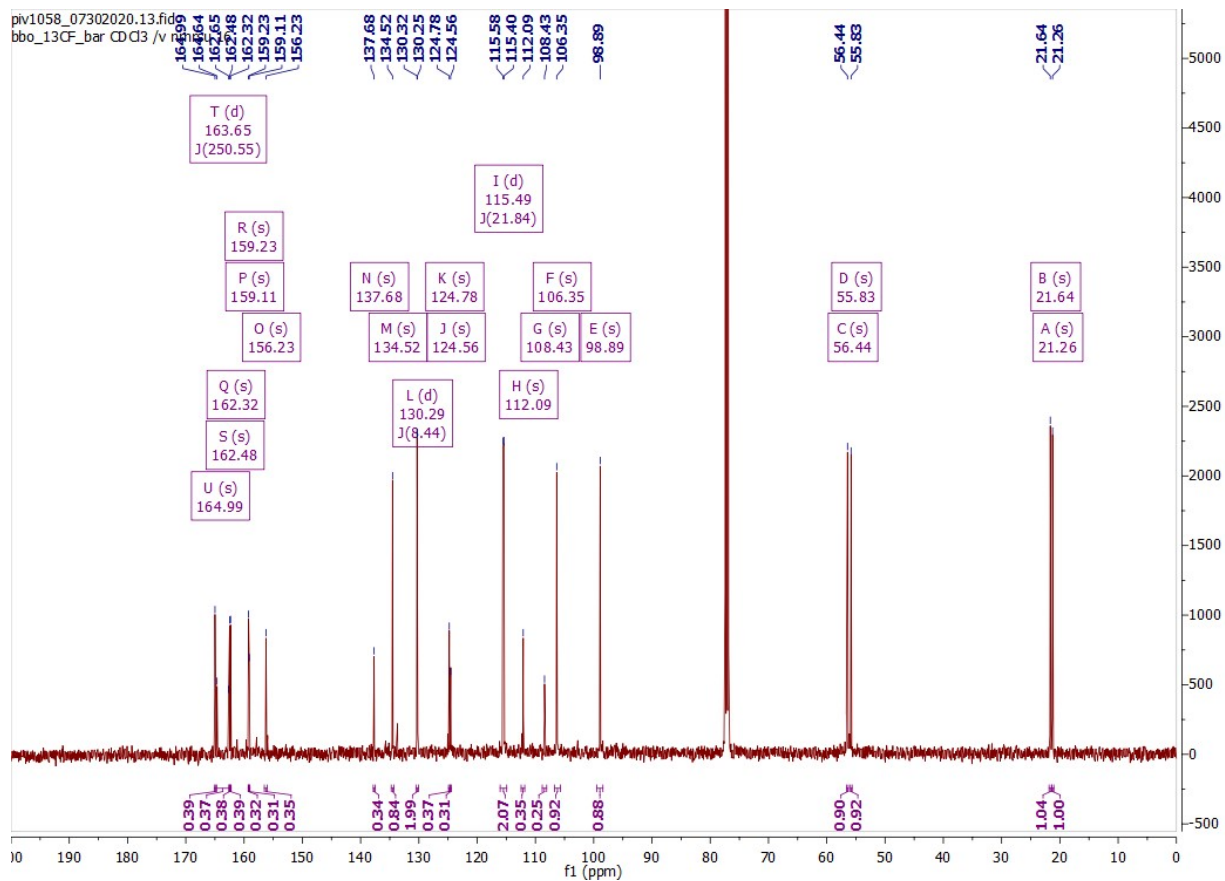

<sup>19</sup>F spectra of **8l**:

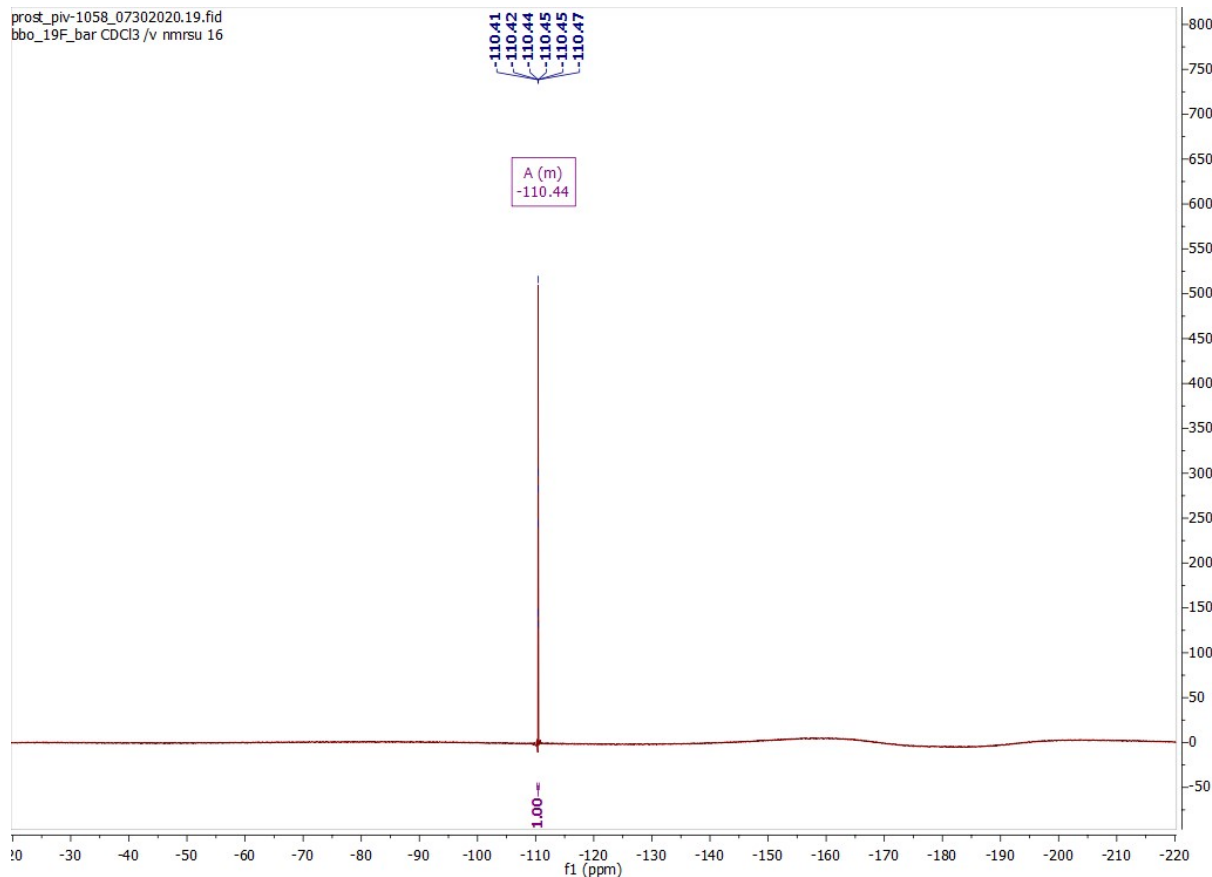

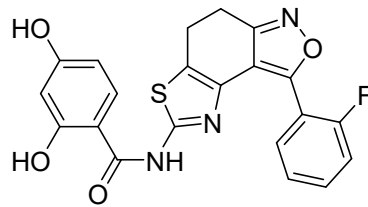

*N*-(8-(2-fluorophenyl)-4,5-dihydrothiazolo[4',5':3,4]benzo[1,2-*c*]isoxazol-2-yl)-2,4-dihydroxybenzamide  
 Chemical Formula: C<sub>21</sub>H<sub>14</sub>FN<sub>3</sub>O<sub>4</sub>S  
 Exact Mass: 423,0689  
 Molecular Weight: 423,4184

**8m**

<sup>1</sup>H spectra of **8m**:

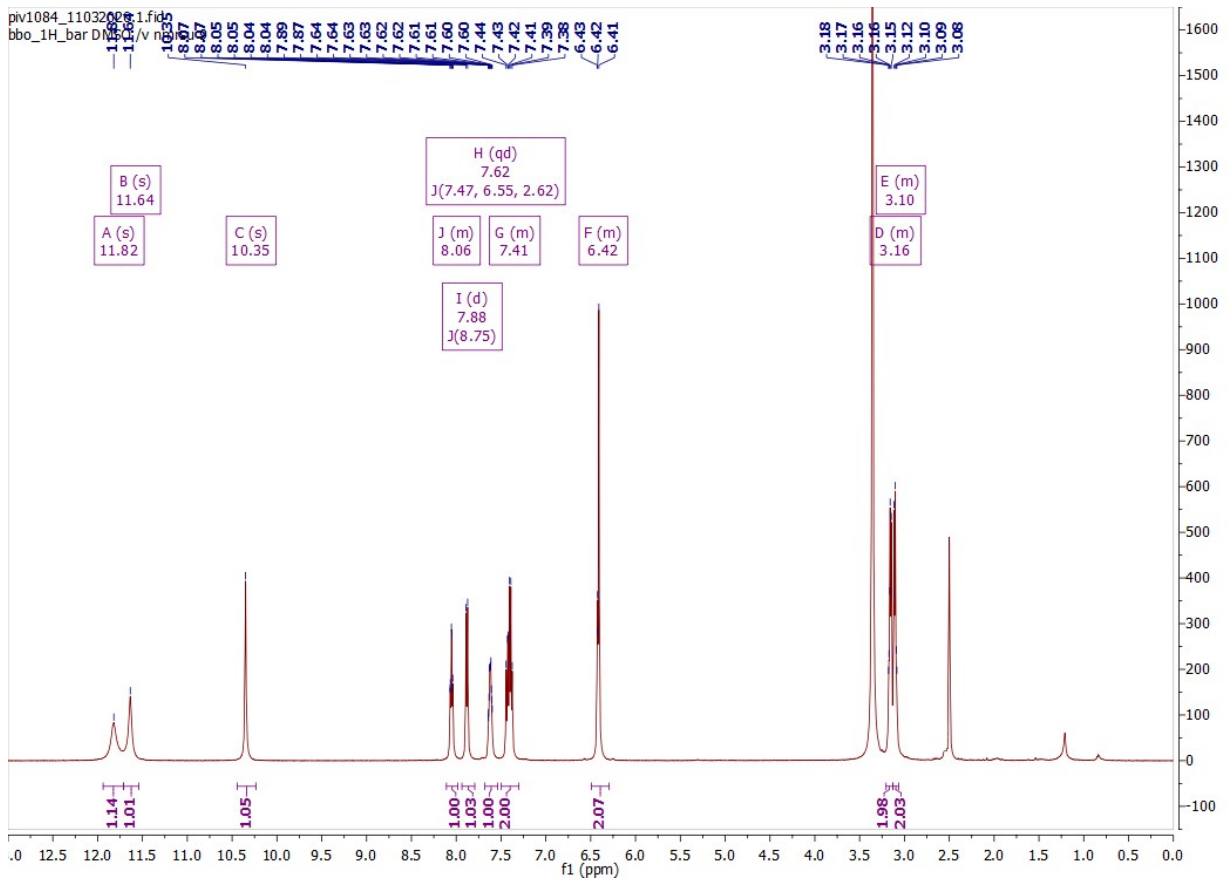

<sup>13</sup>C spectra of **8m**:

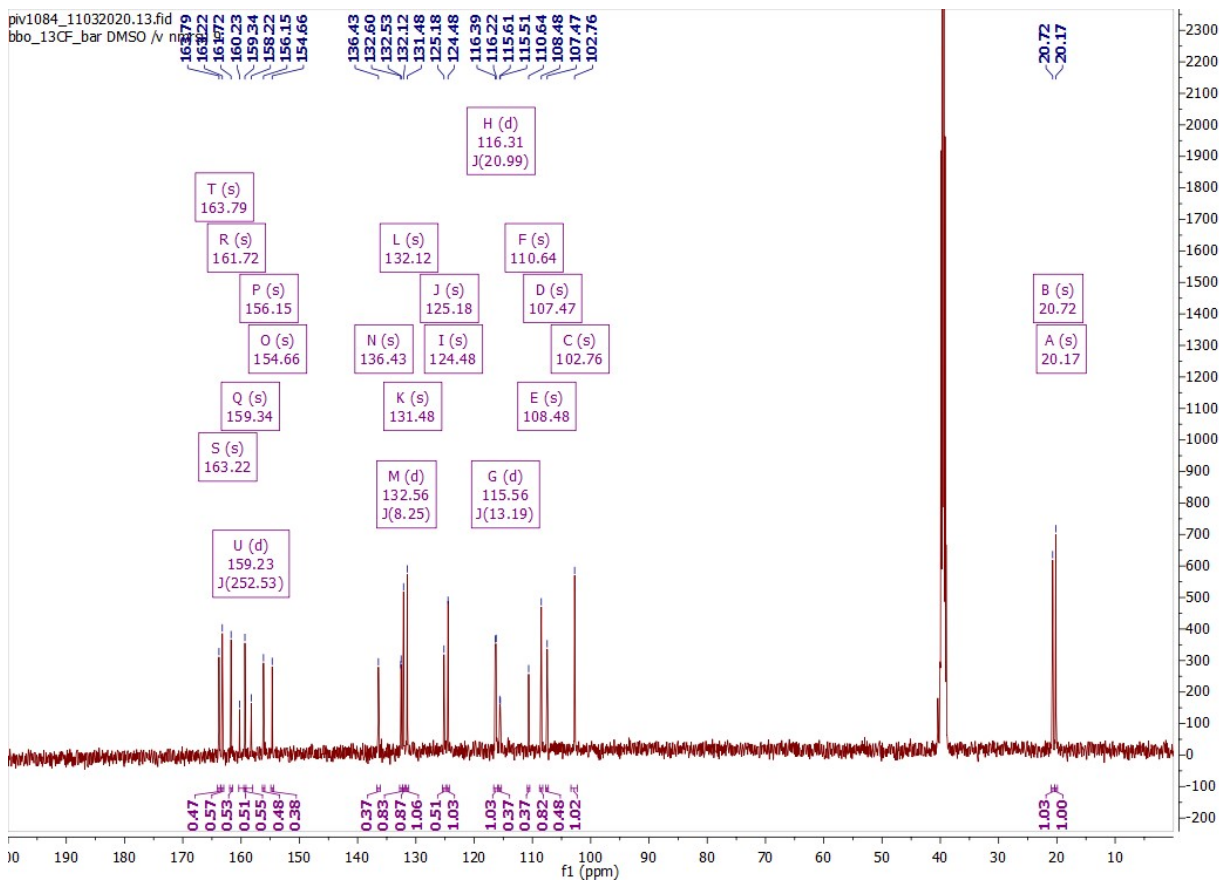

<sup>19</sup>F spectra of **8m**:

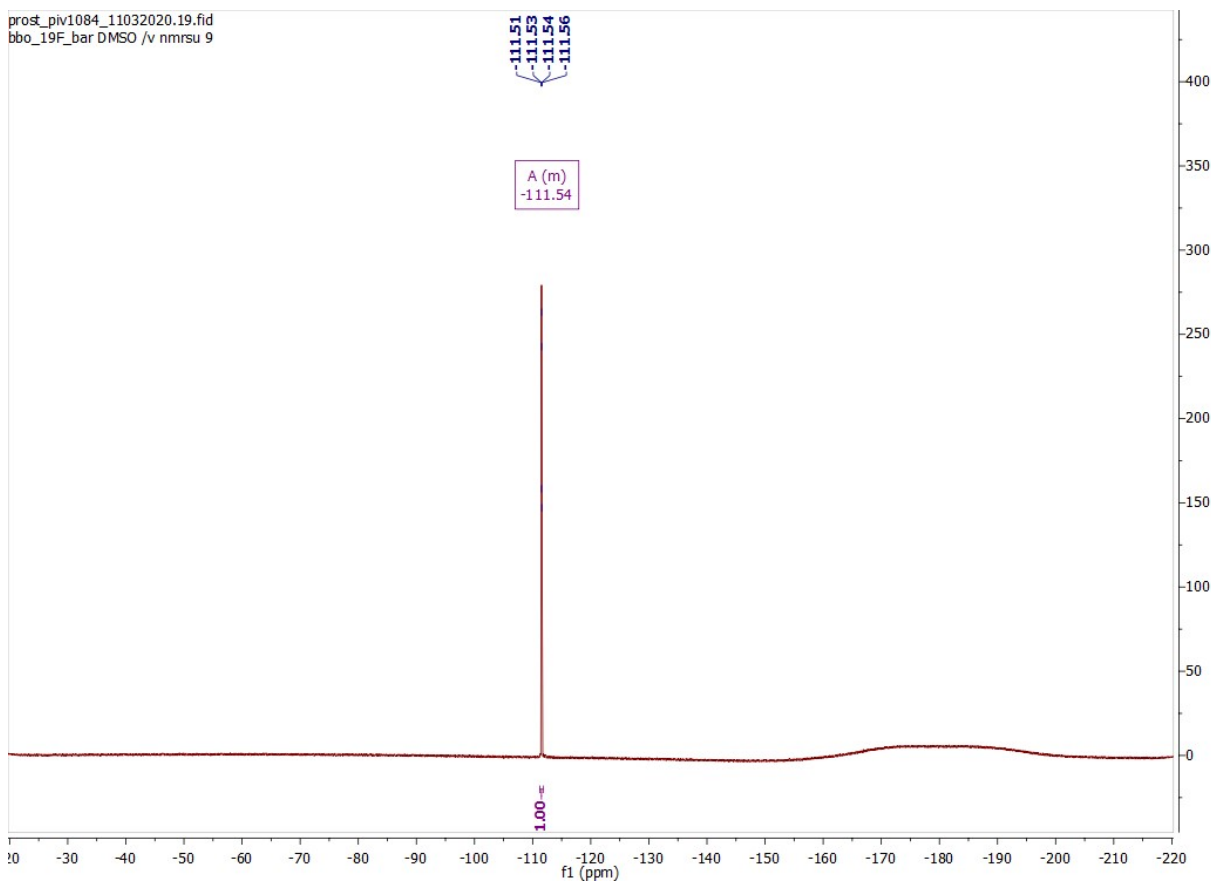



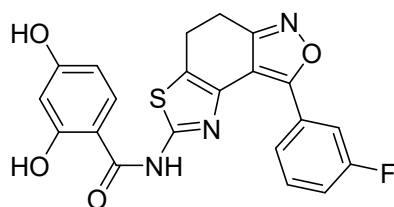

*N*-(8-(3-fluorophenyl)-4,5-dihydrothiazolo[4',5':3,4]benzo[1,2-*c*]isoxazol-2-yl)-2,4-dihydroxybenzamide

Chemical Formula: C<sub>21</sub>H<sub>14</sub>FN<sub>3</sub>O<sub>4</sub>S

Exact Mass: 423,0689

Molecular Weight: 423,4184

**8n**

<sup>1</sup>H spectra of **8n**:

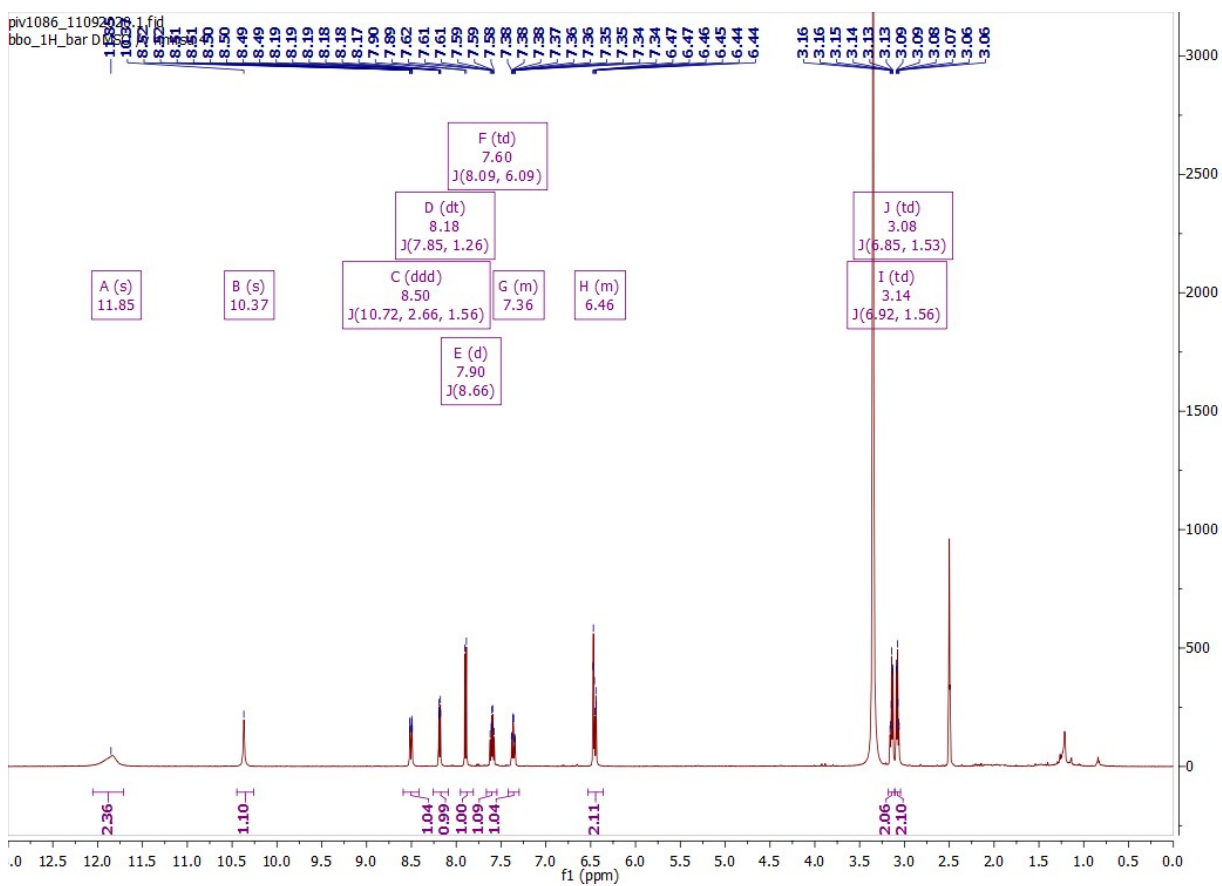

<sup>13</sup>C spectra of **8n**:

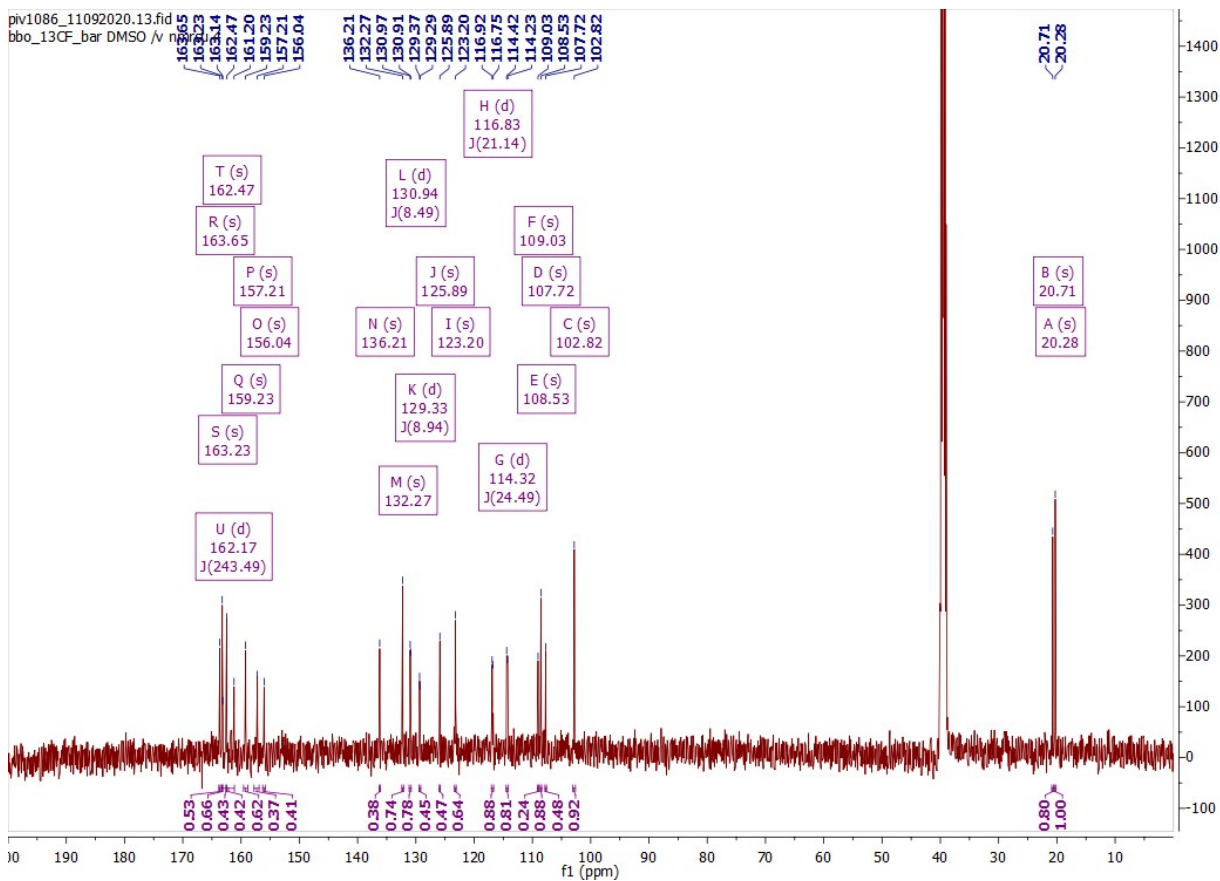

<sup>19</sup>F NMR spectra of **8n**:

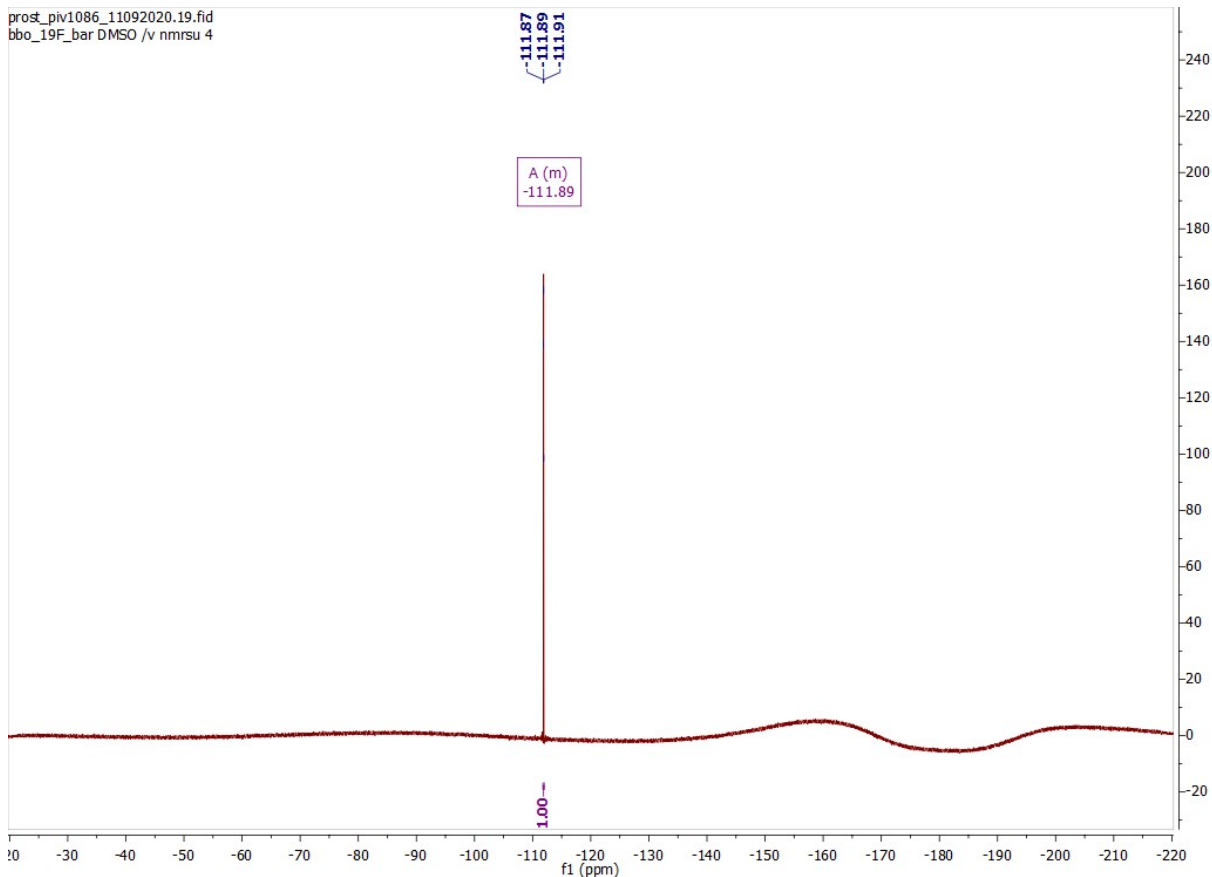

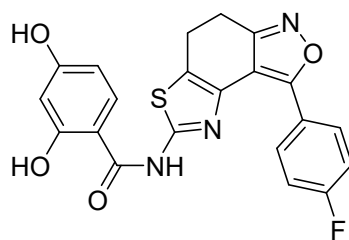

*N*-(8-(4-fluorophenyl)-4,5-dihydrothiazolo[4',5':3,4]benzo[1,2-c]isoxazol-2-yl)-2,4-dihydroxybenzamide  
 Chemical Formula: C<sub>21</sub>H<sub>14</sub>FN<sub>3</sub>O<sub>4</sub>S  
 Exact Mass: 423,0689  
 Molecular Weight: 423,4184

**80**

<sup>1</sup>H spectra of **80**:

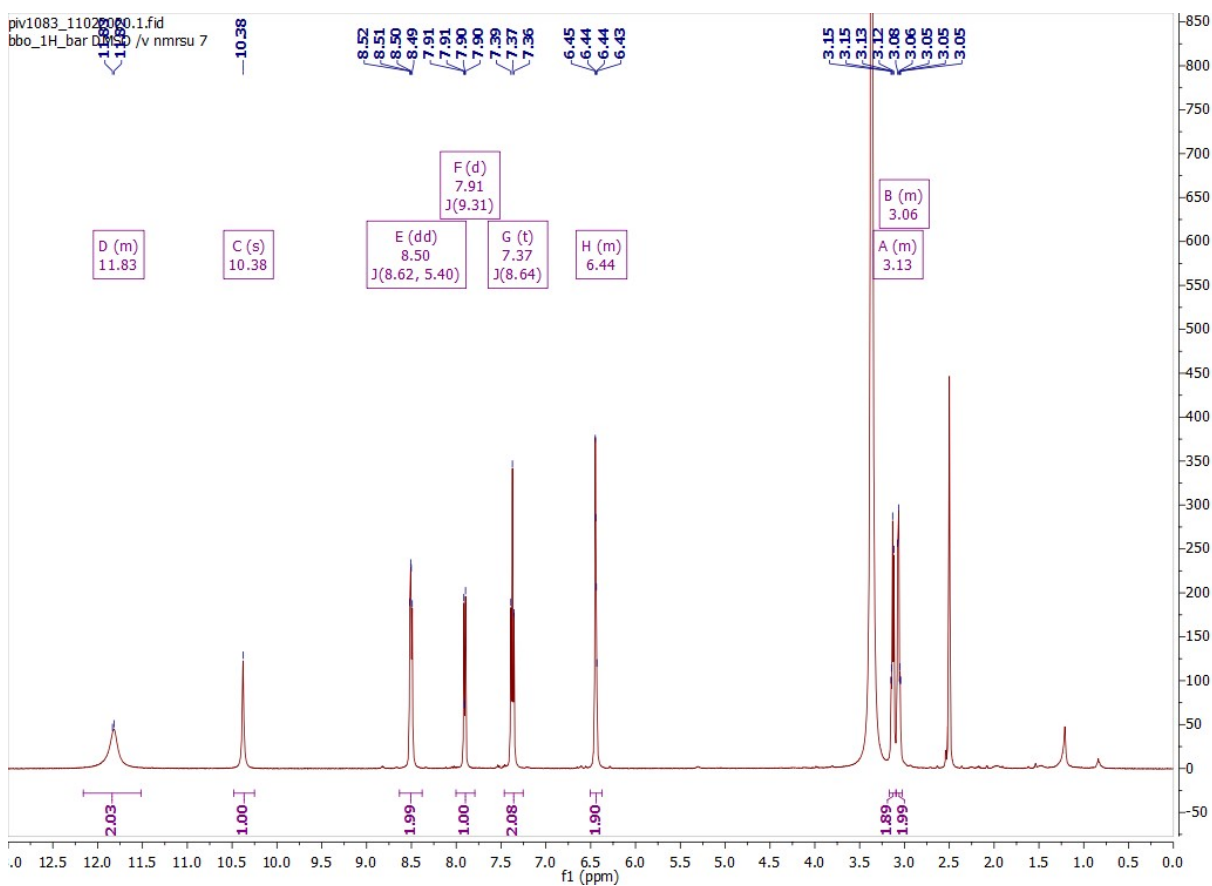

<sup>13</sup>C spectra of **8o**:

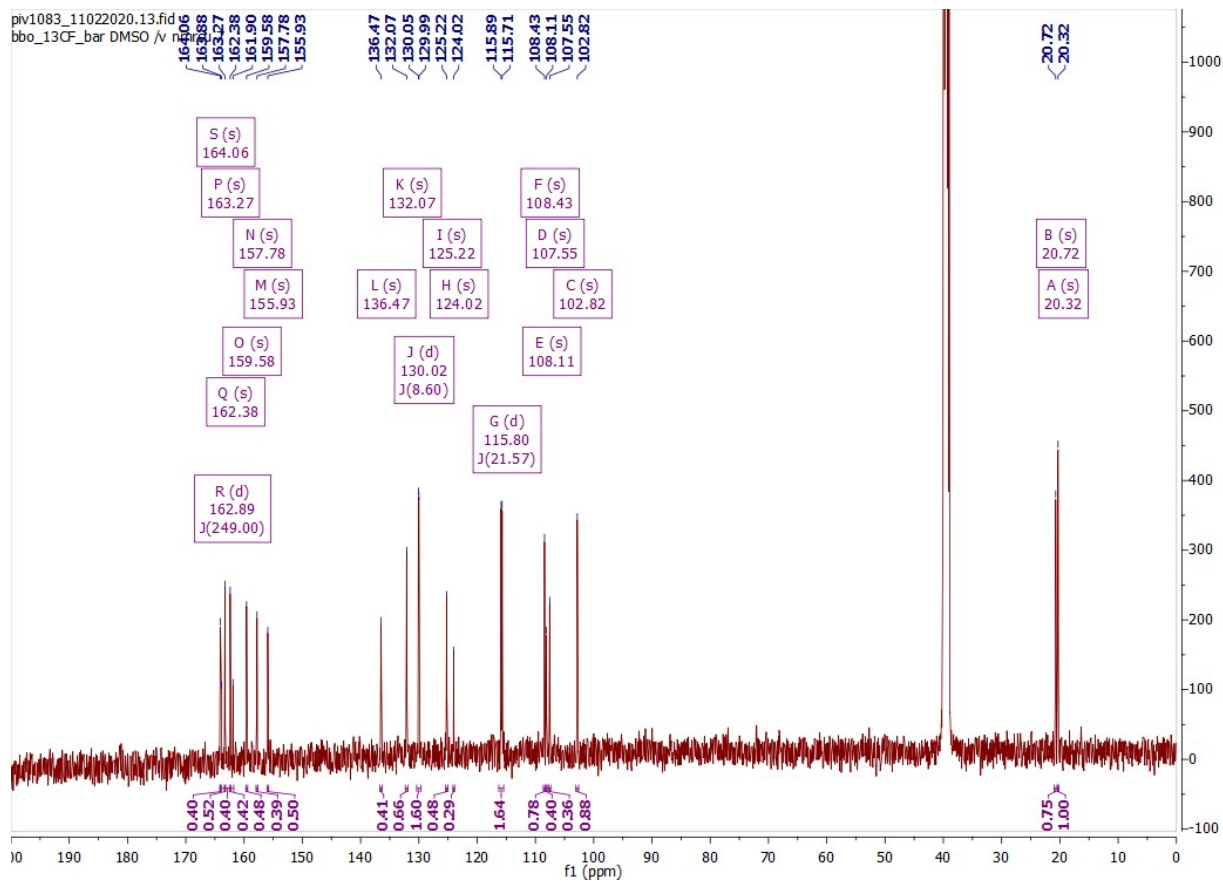

<sup>19</sup>F spectra of **8o**:

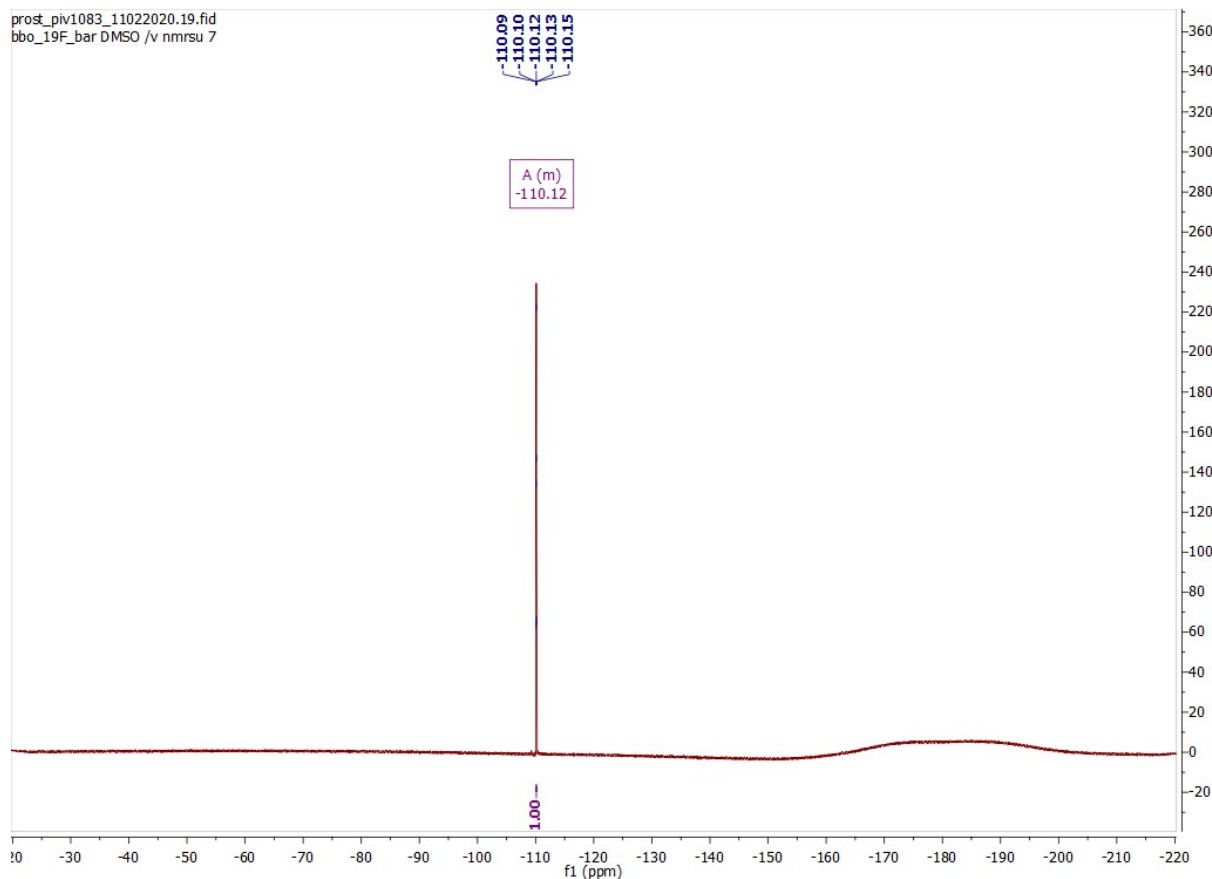

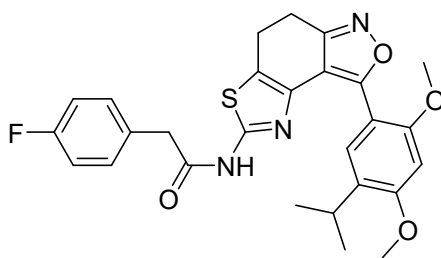

2-(4-fluorophenyl)-*N*-(8-(5-isopropyl-2,4-dimethoxyphenyl)-4,5-dihydrothiazolo[4',5':3,4]benzo[1,2-*c*]isoxazol-2-yl)acetamide  
 Chemical Formula: C<sub>27</sub>H<sub>26</sub>FN<sub>3</sub>O<sub>4</sub>S  
 Exact Mass: 507,1628  
 Molecular Weight: 507,5804

**8p**

<sup>1</sup>H spectra of **8p**:

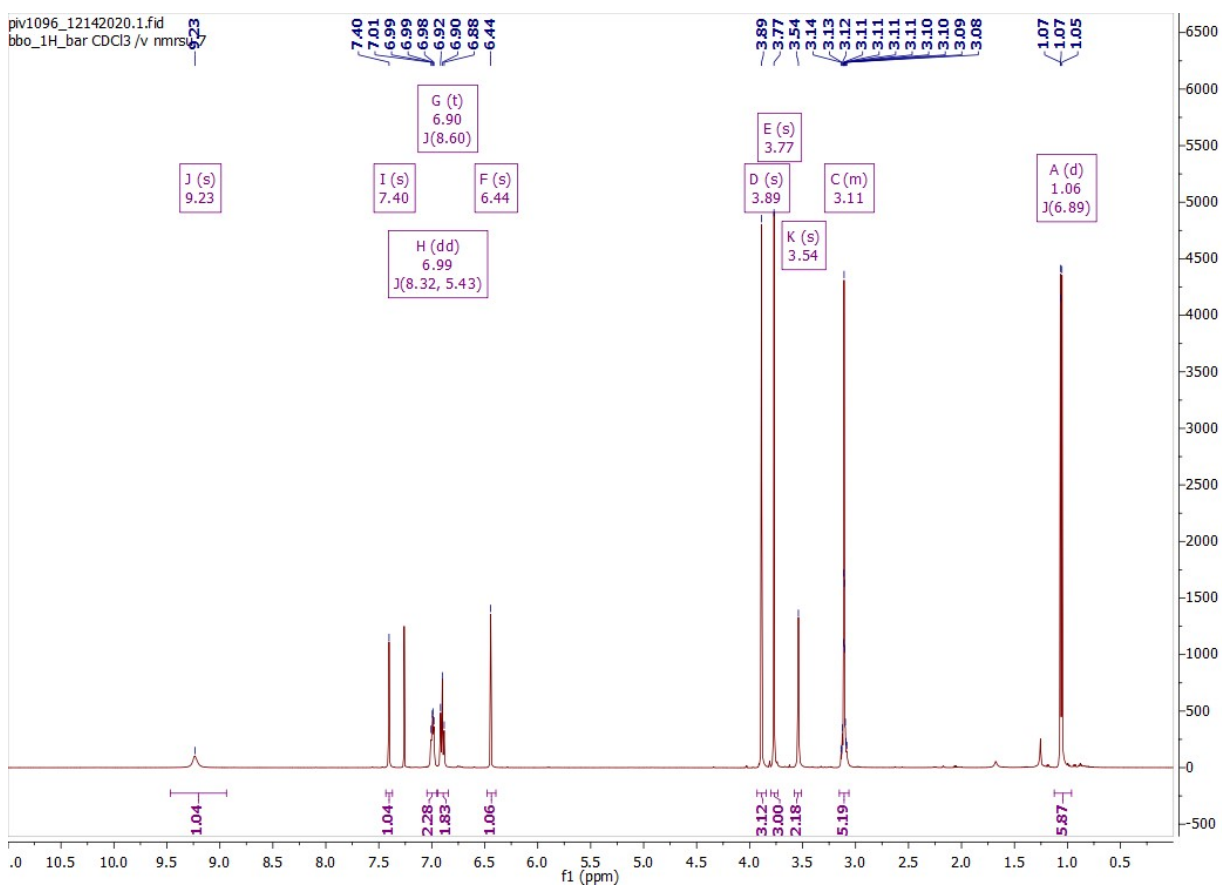



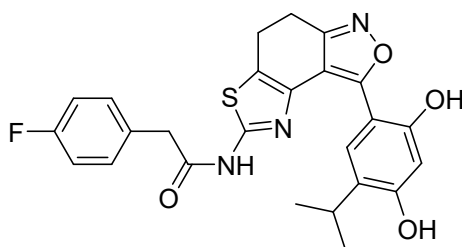

*N*-(8-(2,4-dihydroxy-5-isopropylphenyl)-4,5-dihydrothiazolo[4',5':3,4]benzo[1,2-c]isoxazol-2-yl)-2-(4-fluorophenyl)acetamide  
 Chemical Formula: C<sub>25</sub>H<sub>22</sub>FN<sub>3</sub>O<sub>4</sub>S  
 Exact Mass: 479,1315  
 Molecular Weight: 479,5264

**8q**

**<sup>1</sup>H spectra of 8q:**

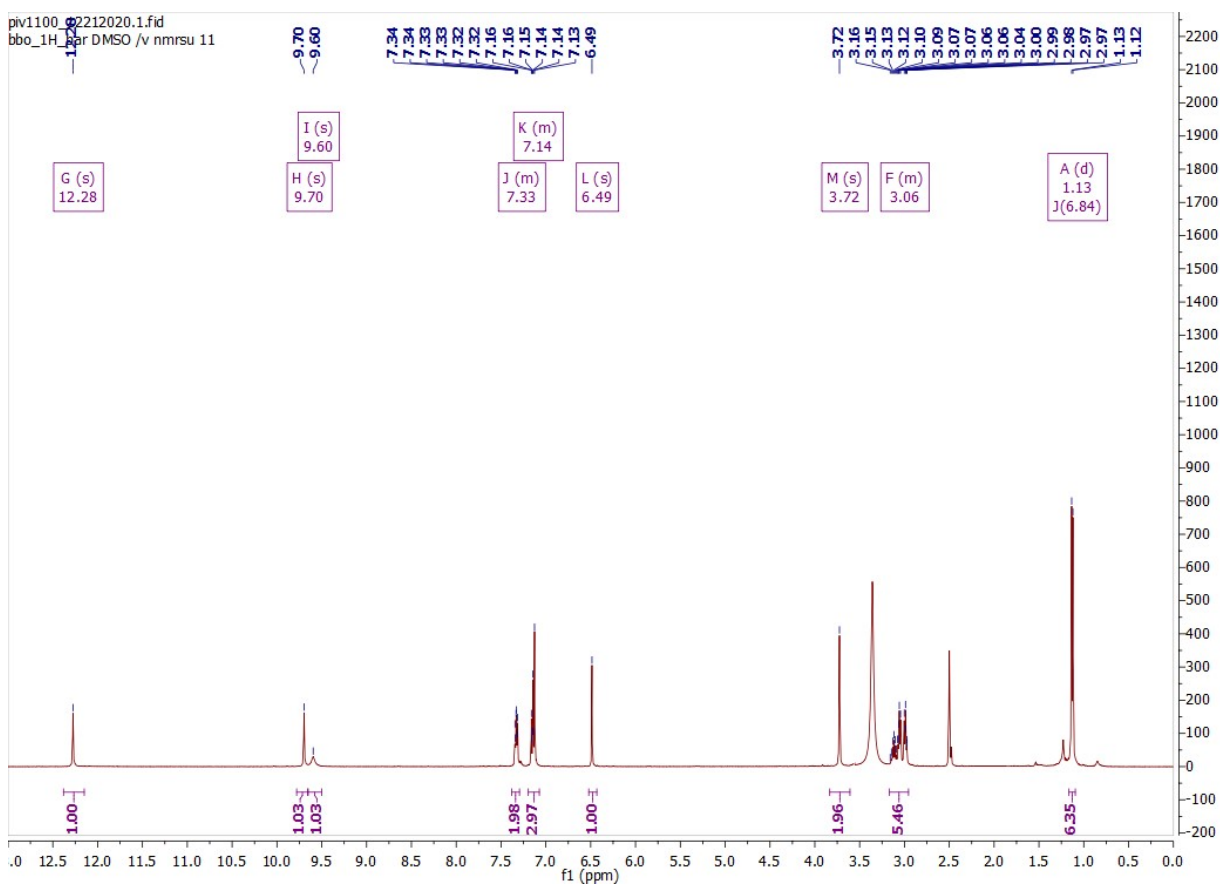

<sup>13</sup>C spectra of **8q**:

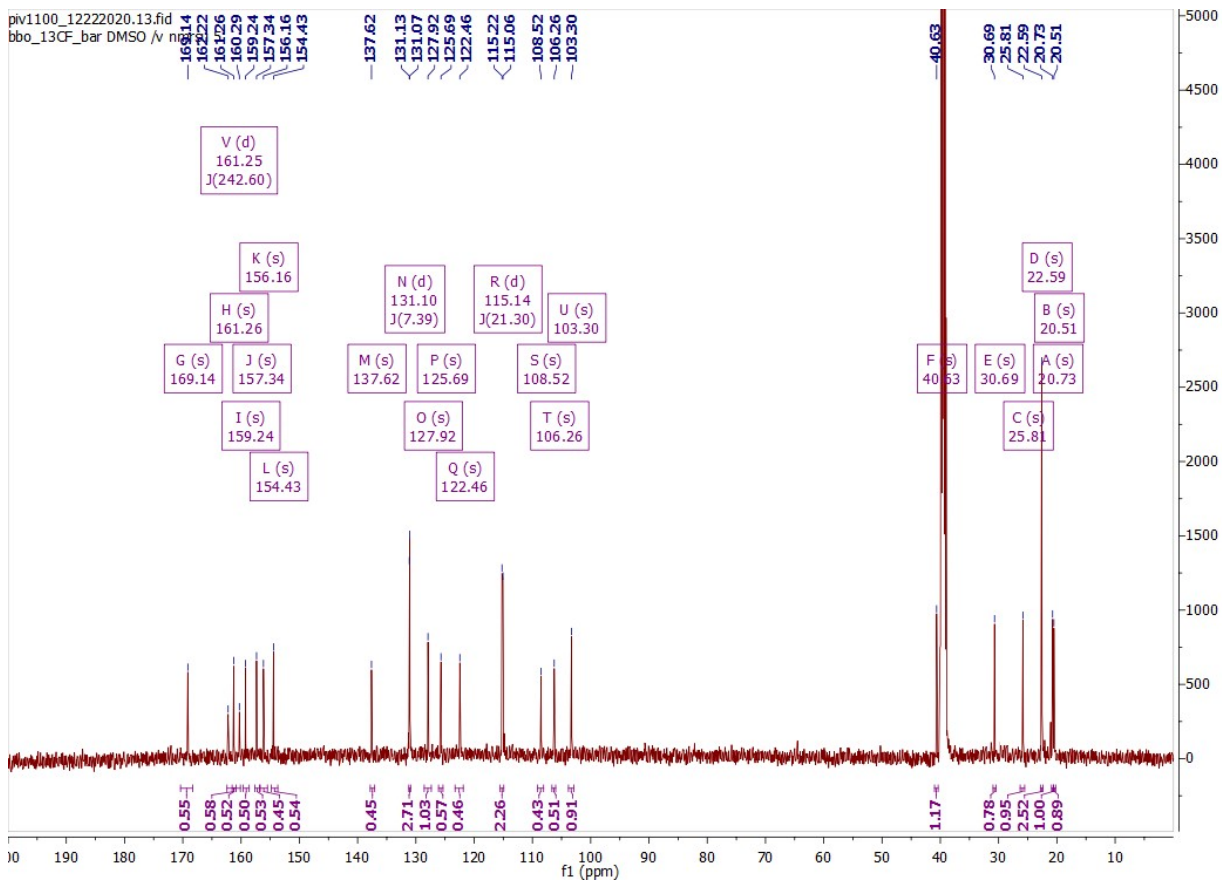

<sup>19</sup>F spectra of **8q**:

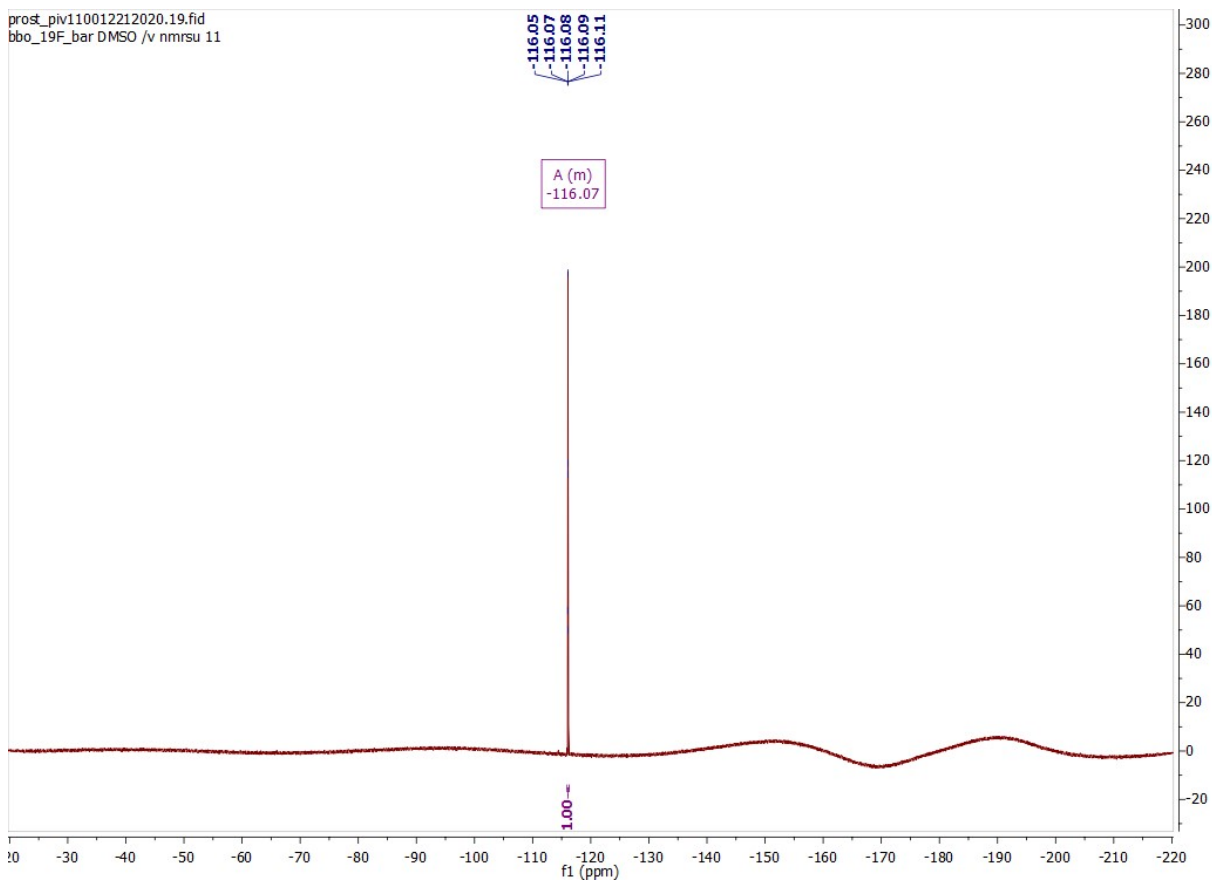



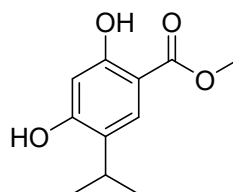

methyl 2,4-dihydroxy-5-isopropylbenzoate

Chemical Formula:  $C_{11}H_{14}O_4$

Exact Mass: 210,0892

Molecular Weight: 210,2290

**10**

$^1H$  spectra of **10**:

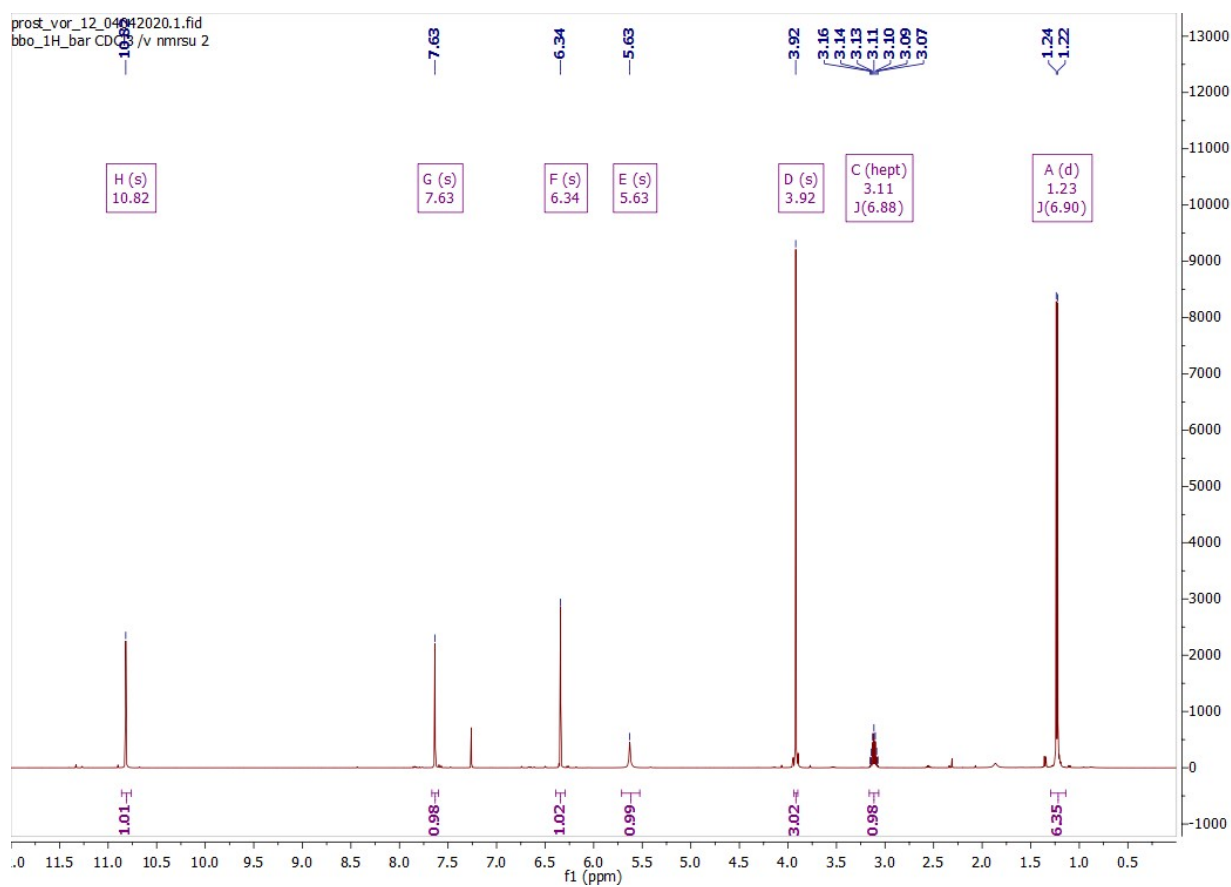

<sup>13</sup>C spectra of 10:

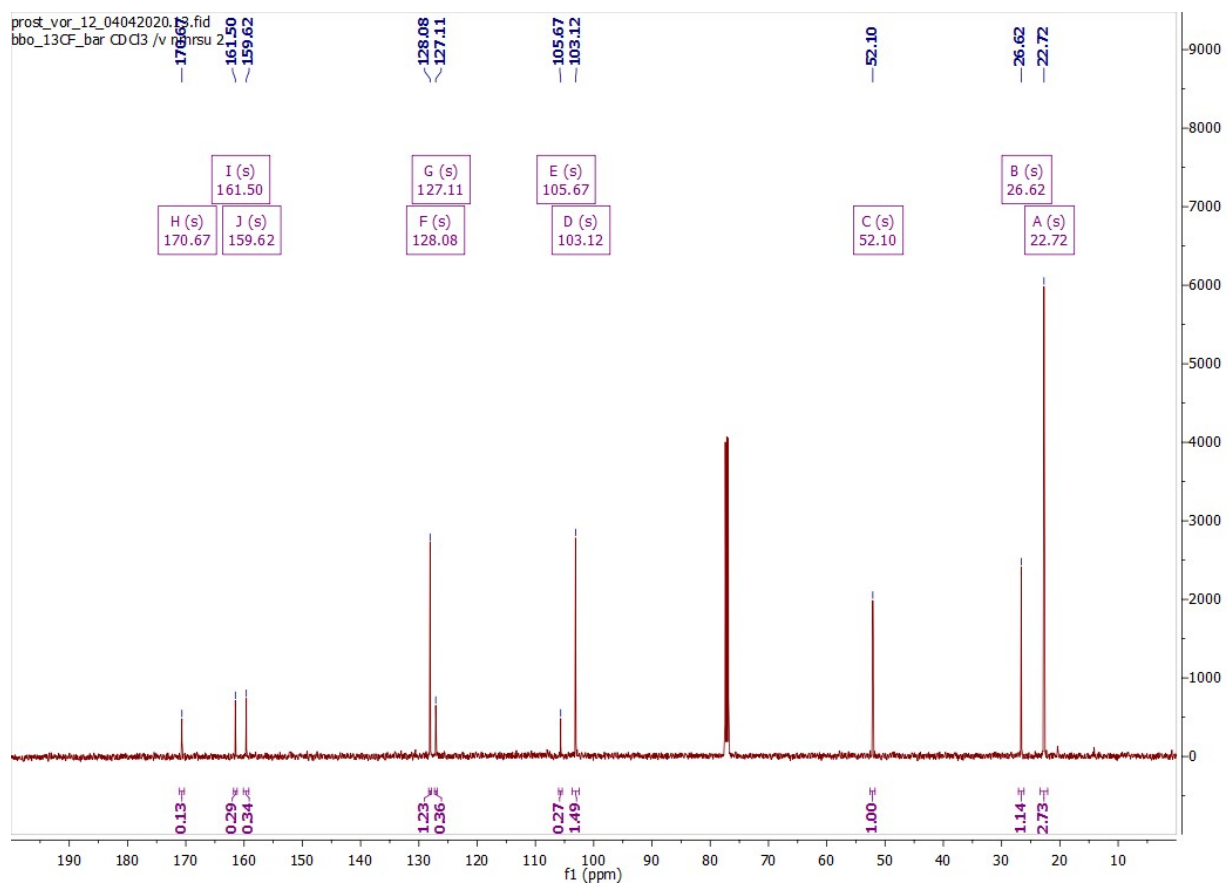

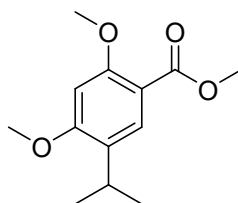

methyl 5-isopropyl-2,4-dimethoxybenzoate

Chemical Formula: C<sub>13</sub>H<sub>18</sub>O<sub>4</sub>

Exact Mass: 238,1205

Molecular Weight: 238,2830

**11**

<sup>1</sup>H spectra of **11**:

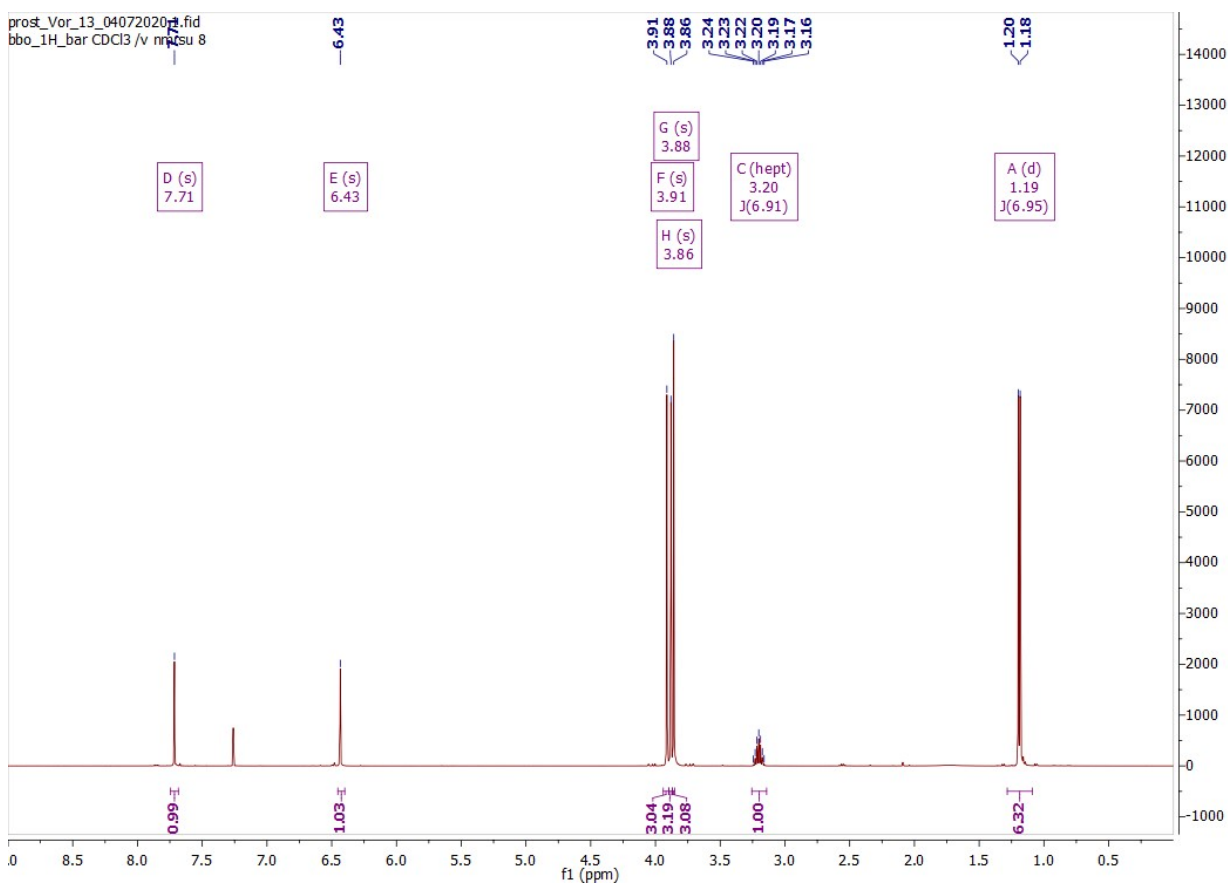

# <sup>13</sup>C spectra of 11:

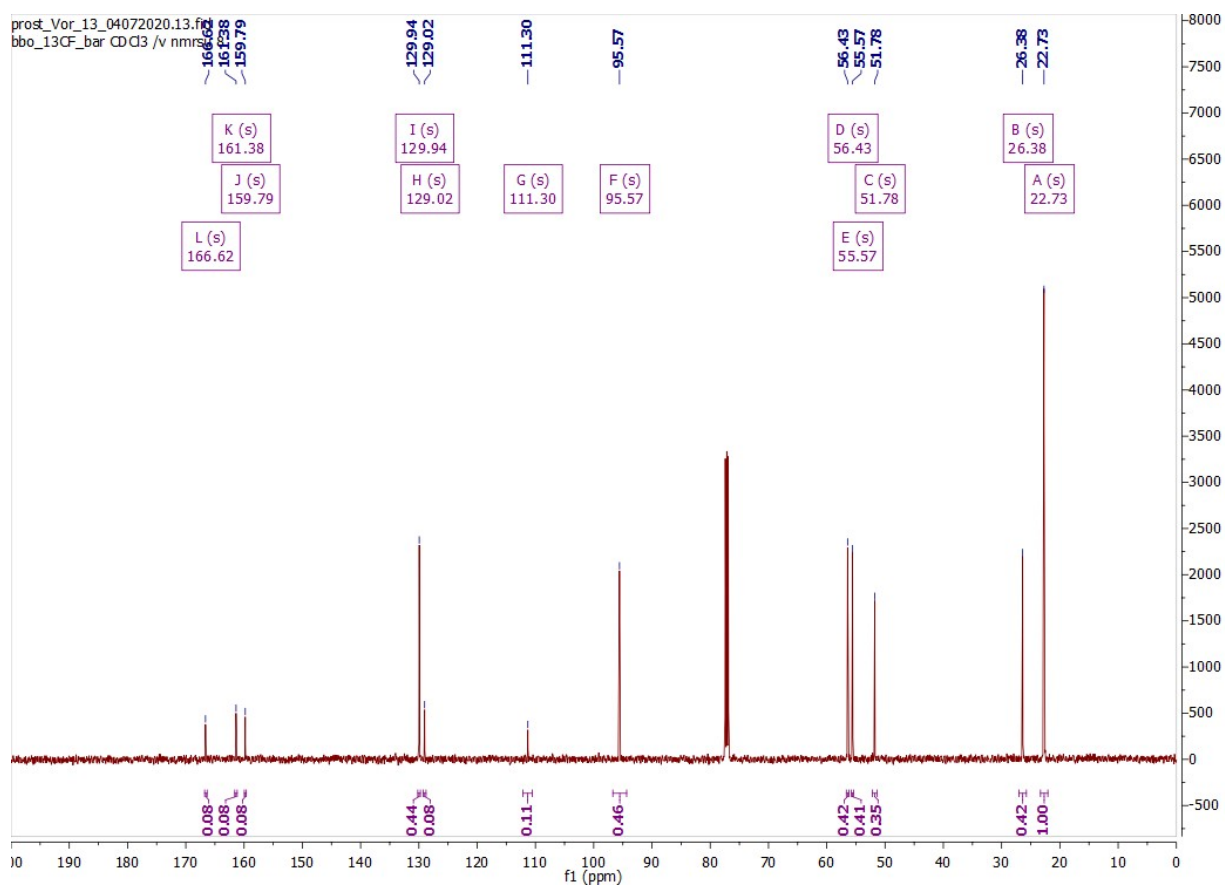

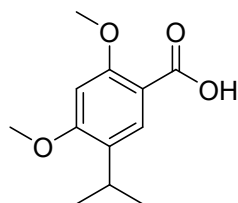

5-isopropyl-2,4-dimethoxybenzoic acid

Chemical Formula: C<sub>12</sub>H<sub>16</sub>O<sub>4</sub>

Exact Mass: 224,1049

Molecular Weight: 224,2560

12

<sup>1</sup>H spectra of 12:

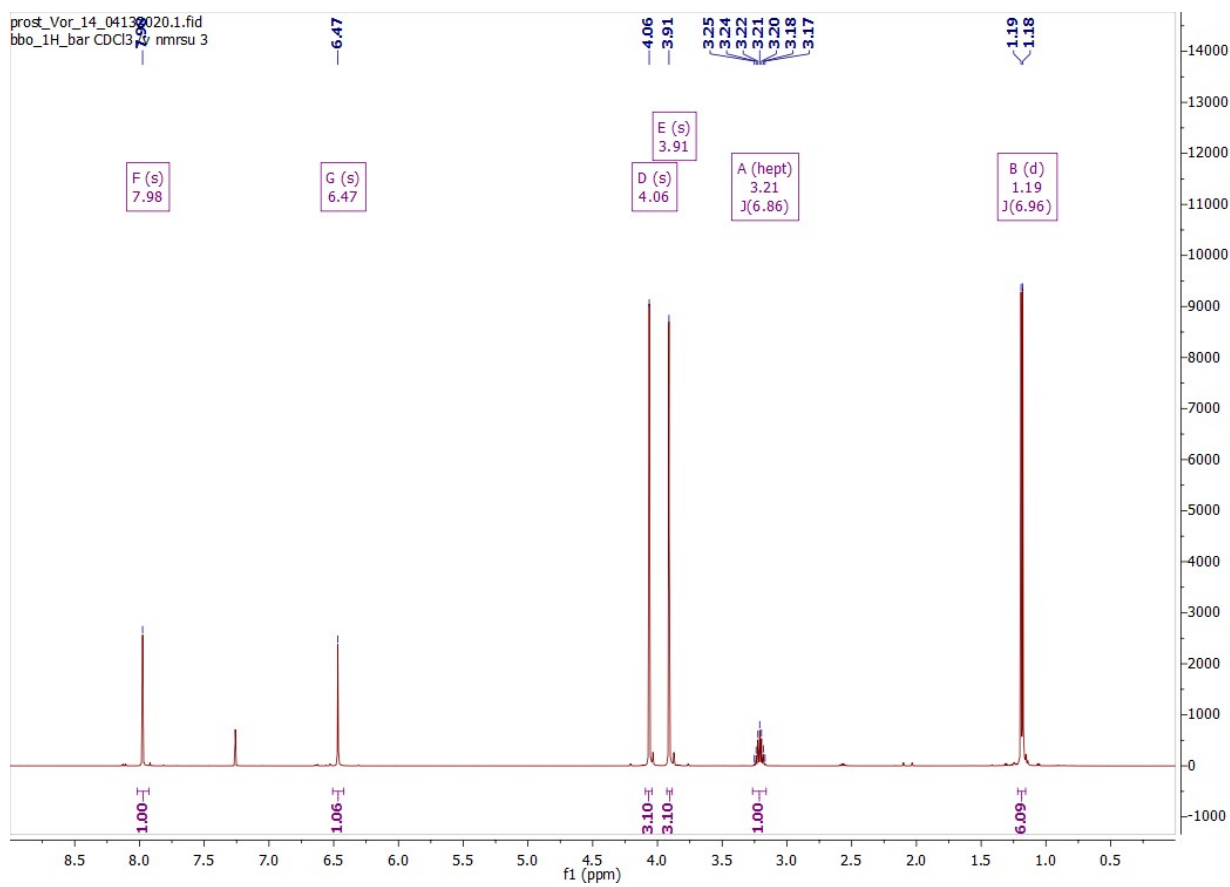

# <sup>13</sup>C spectra of 12:

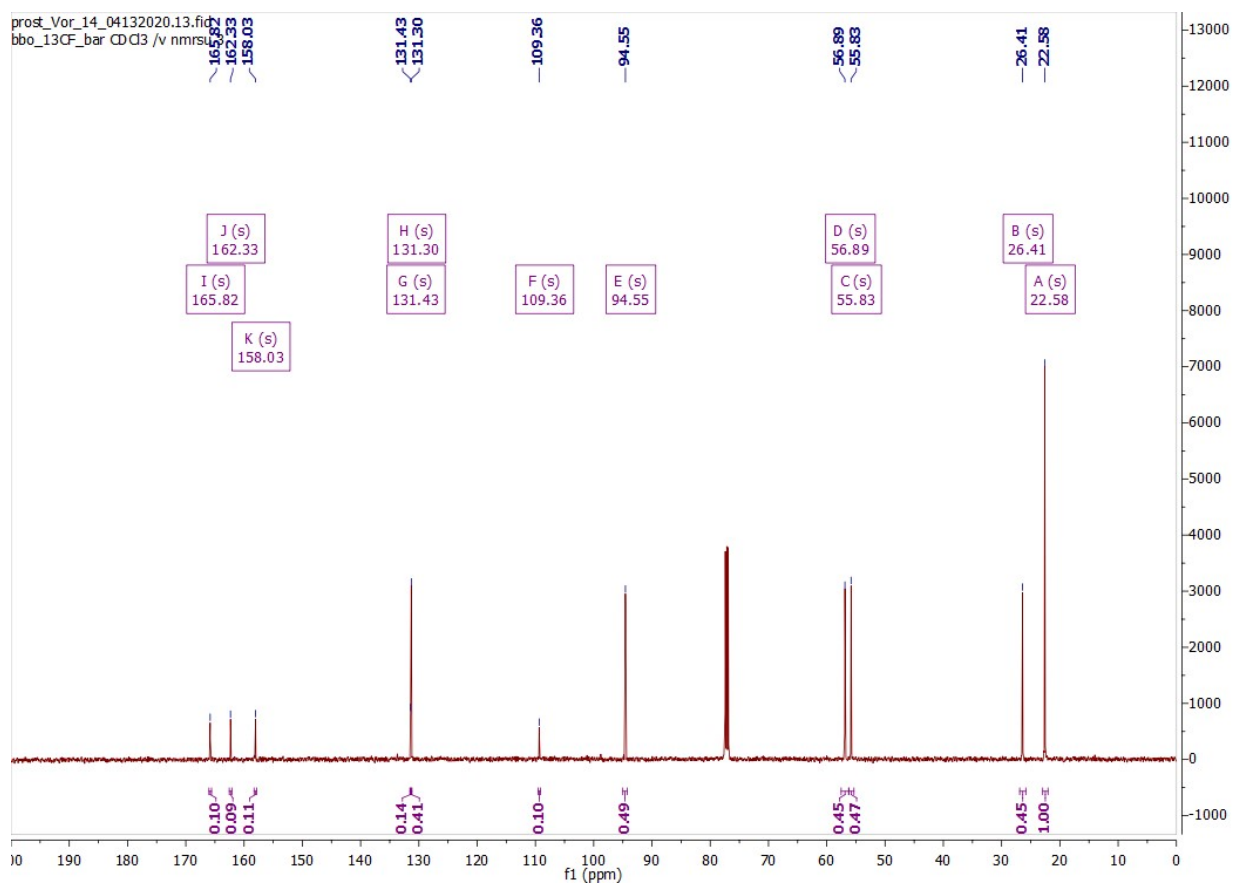

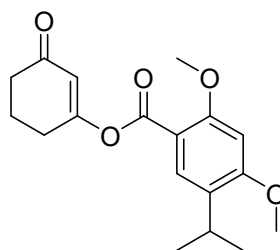

3-oxocyclohex-1-en-1-yl 5-isopropyl-2,4-dimethoxybenzoate

Chemical Formula:  $C_{18}H_{22}O_5$

Exact Mass: 318,1467

Molecular Weight: 318,3690

14

$^1H$  spectra of 13:

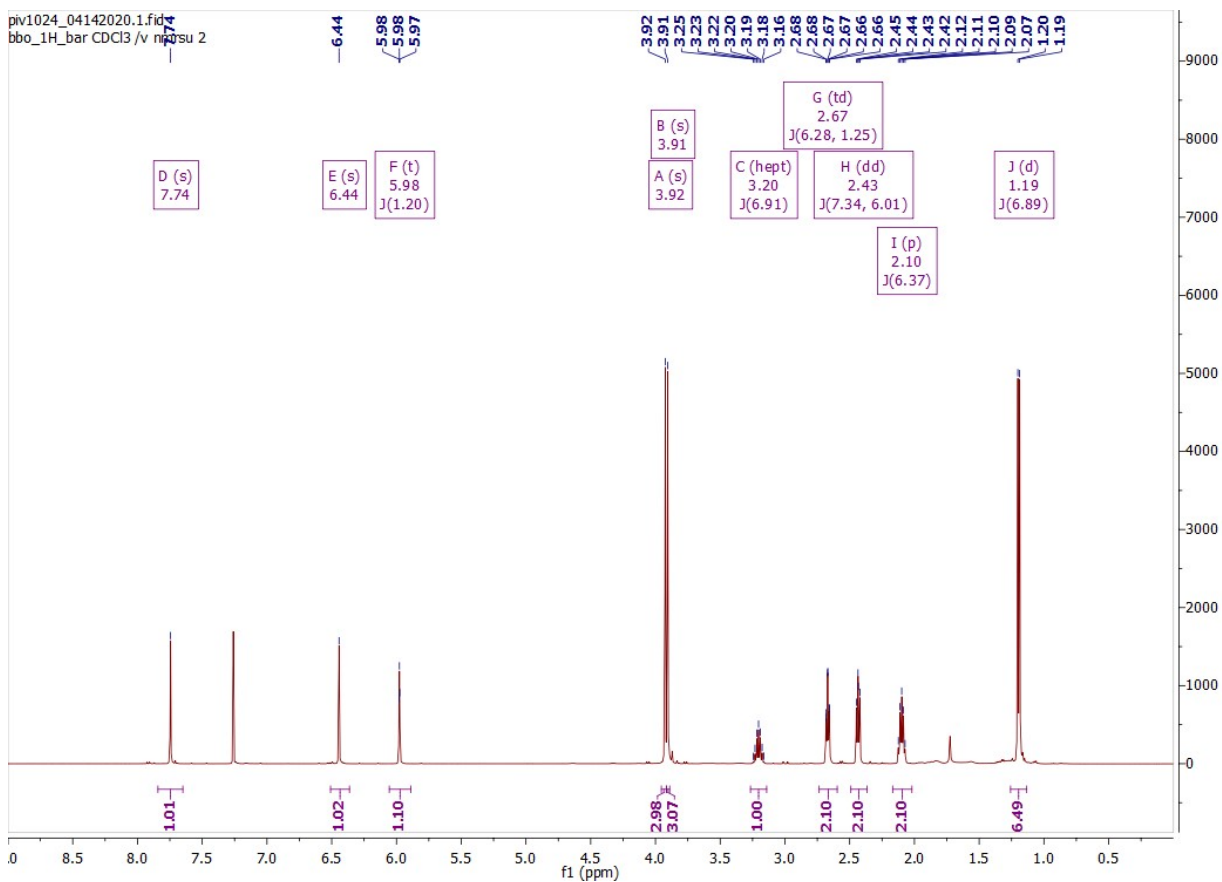

<sup>13</sup>C spectra of 14:

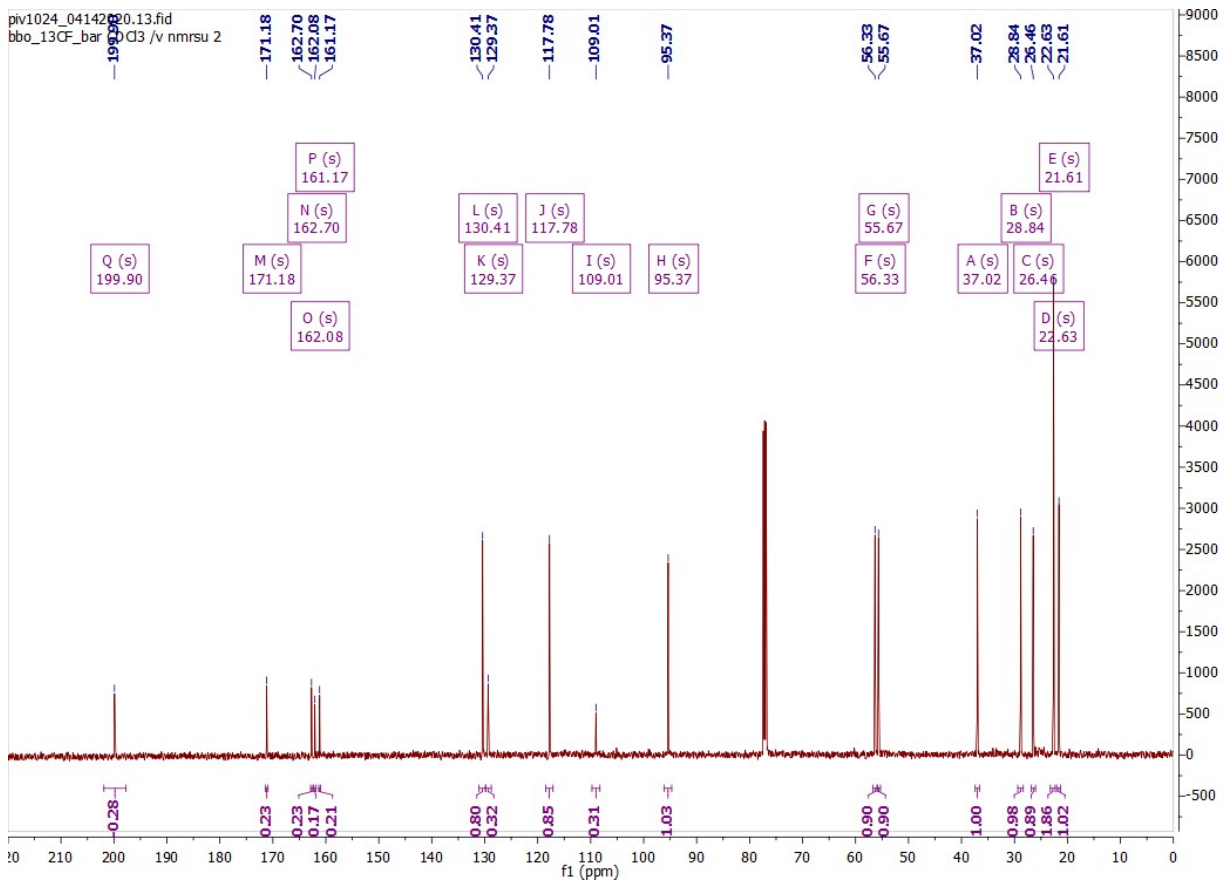



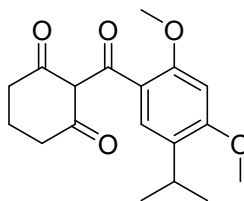

2-(5-isopropyl-2,4-dimethoxybenzoyl)cyclohexane-1,3-dione

Chemical Formula:  $C_{18}H_{22}O_5$

Exact Mass: 318,1467

Molecular Weight: 318,3690

15

$^1H$  spectra of 15:

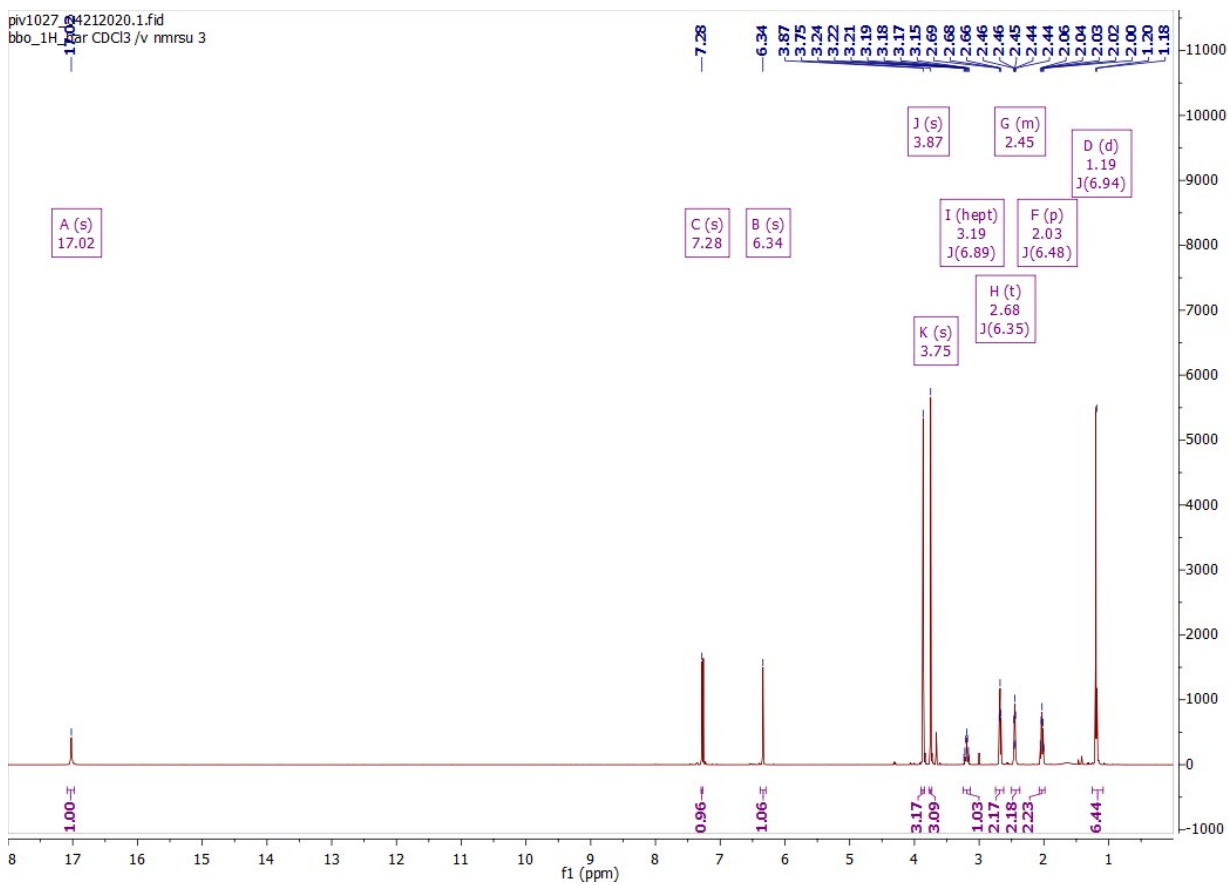

<sup>13</sup>C spectra of 15:

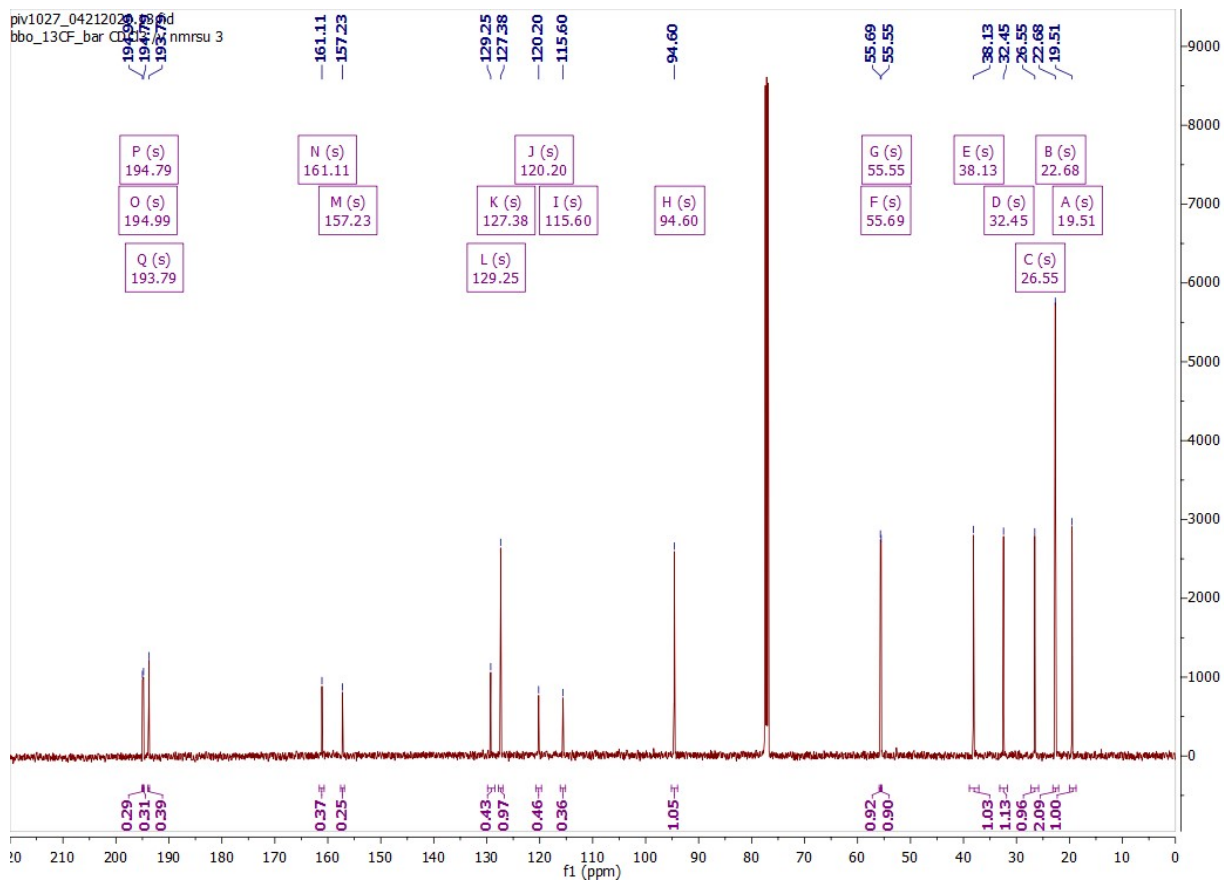

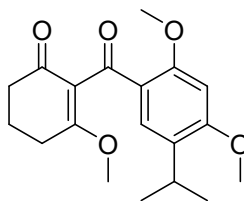

2-(5-isopropyl-2,4-dimethoxybenzoyl)-3-methoxycyclohex-2-en-1-one

Chemical Formula: C<sub>19</sub>H<sub>24</sub>O<sub>5</sub>

Exact Mass: 332,1624

Molecular Weight: 332,3960

16

<sup>1</sup>H spectra of 16:

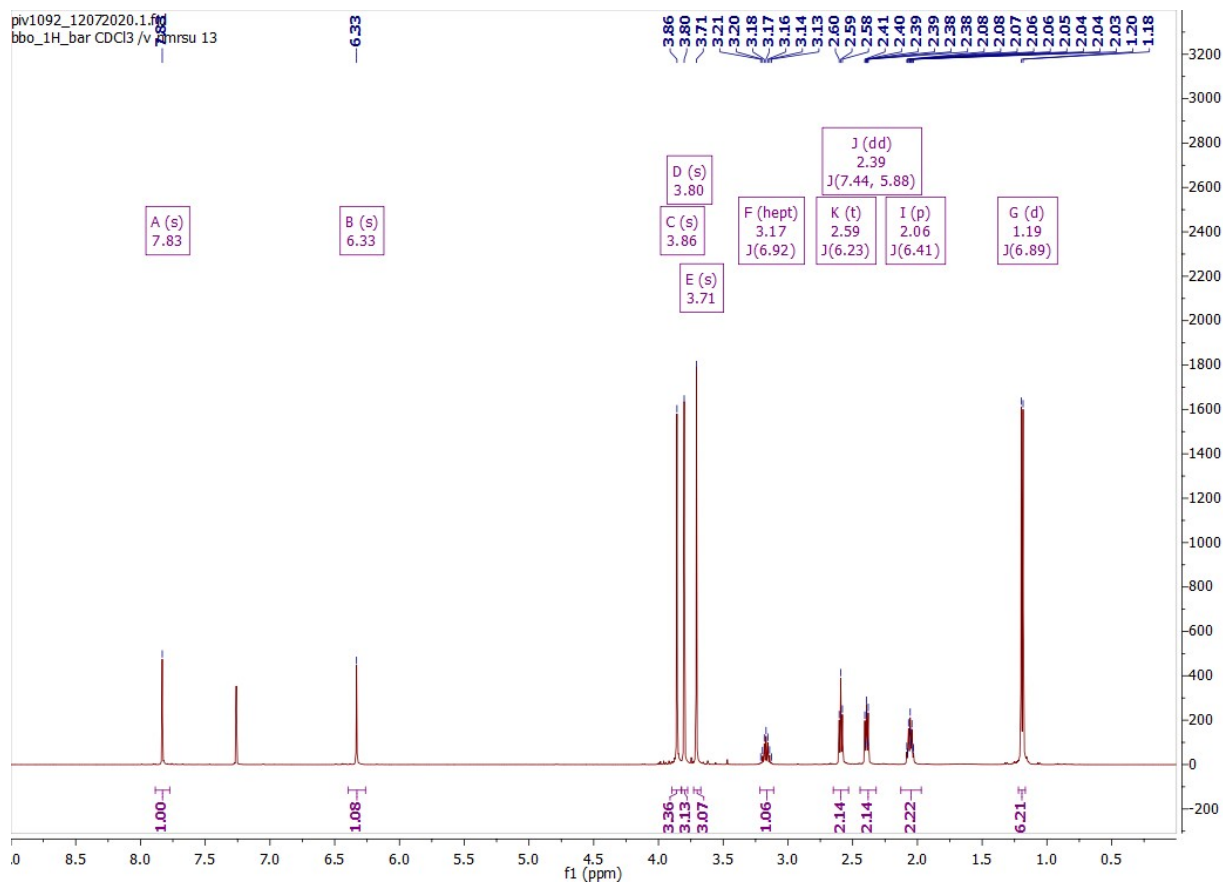

<sup>13</sup>C spectra of 16:

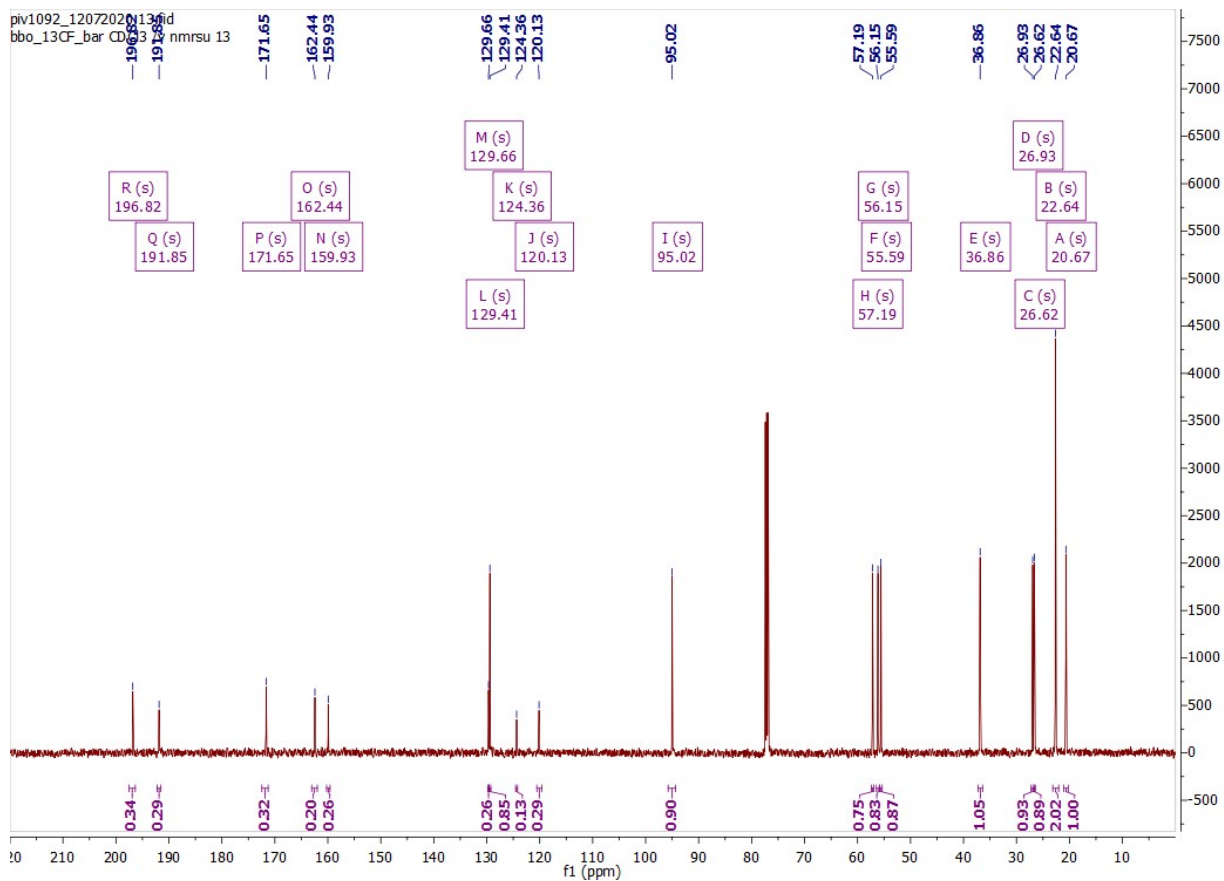



<sup>1</sup>H spectra of 5d:

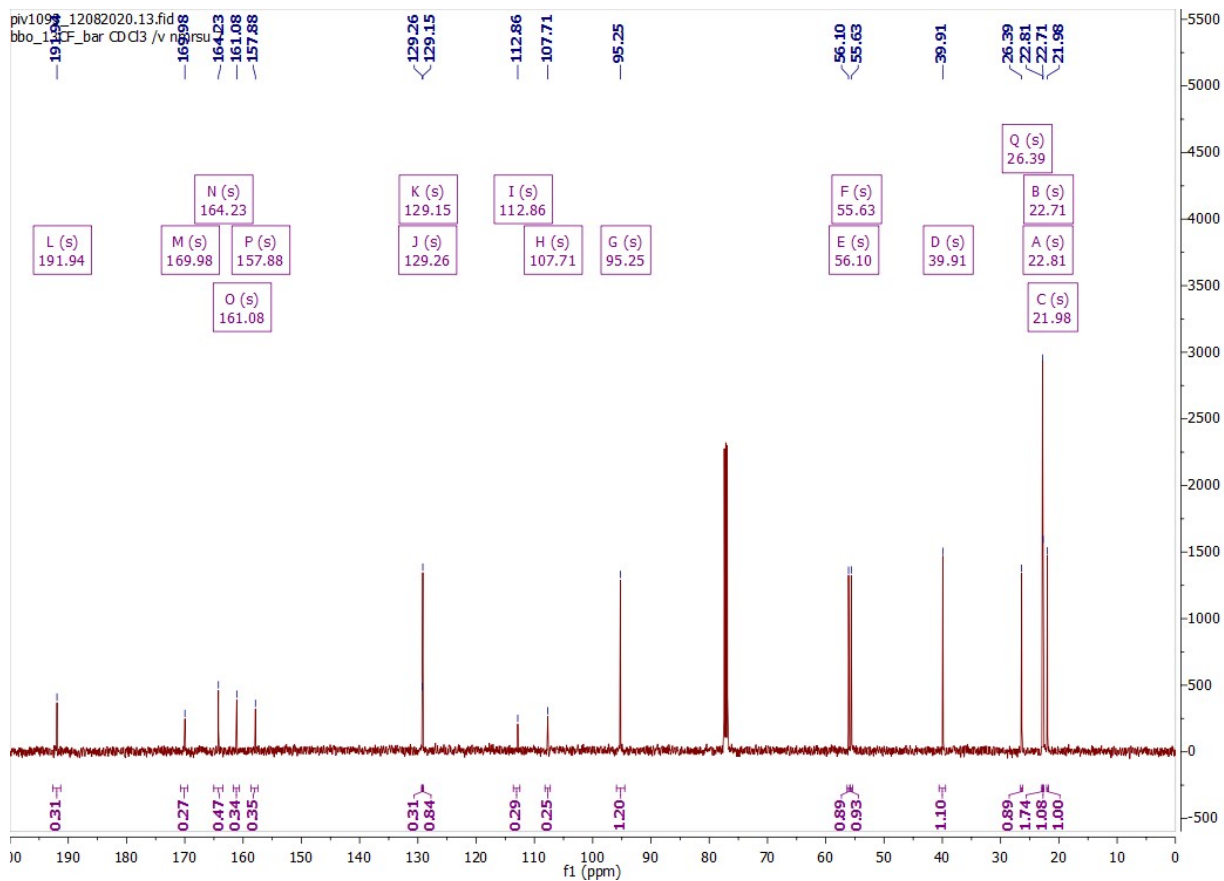

### HPLC of 8b

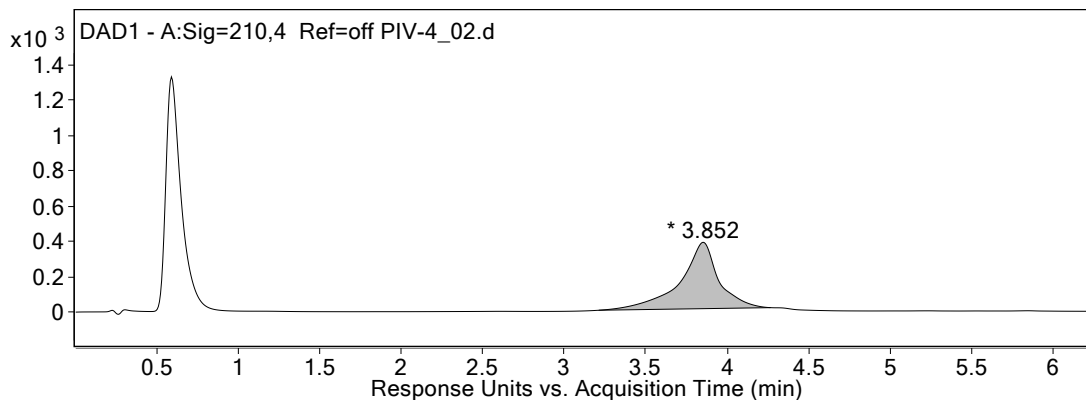

#### Integration Peak List

| Peak | Start | RT    | End   | Height | Area    | Area % |
|------|-------|-------|-------|--------|---------|--------|
| 1    | 3.212 | 3.852 | 4.266 | 376.73 | 6144.71 | 100    |

### HPLC of 8c

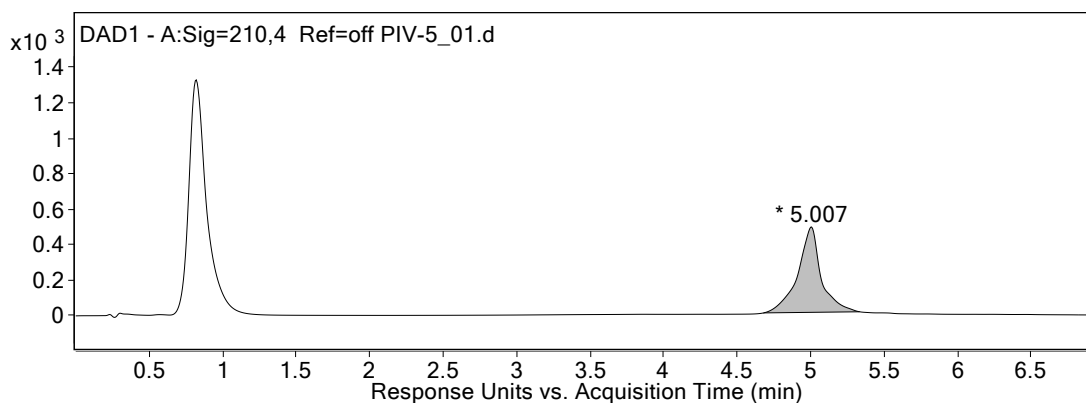

#### Integration Peak List

| Peak | Start | RT    | End   | Height | Area    | Area % |
|------|-------|-------|-------|--------|---------|--------|
| 1    | 4.681 | 5.007 | 5.334 | 481.3  | 5310.47 | 100    |

### HPLC of 8q

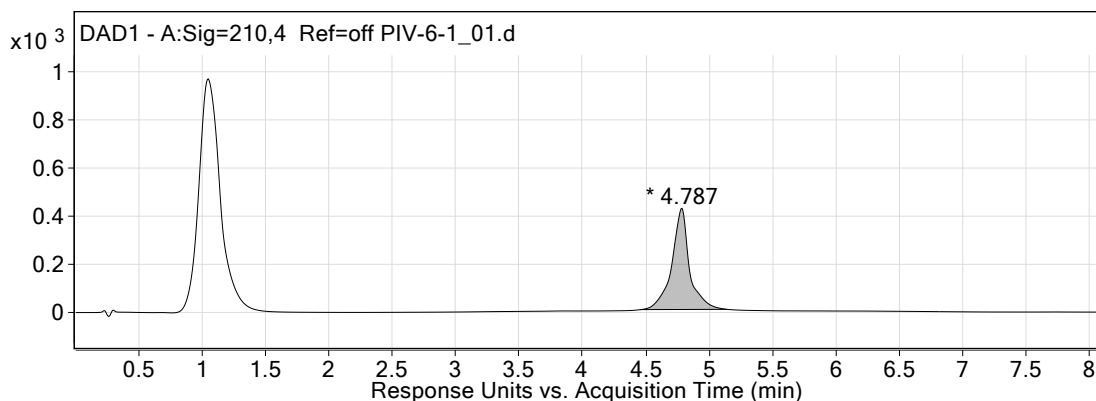

#### Integration Peak List

| Peak | Start | RT    | End  | Height | Area    | Area % |
|------|-------|-------|------|--------|---------|--------|
| 1    | 4.46  | 4.787 | 5.14 | 419.6  | 4066.23 | 100    |

## Western blots

### Uncropped images

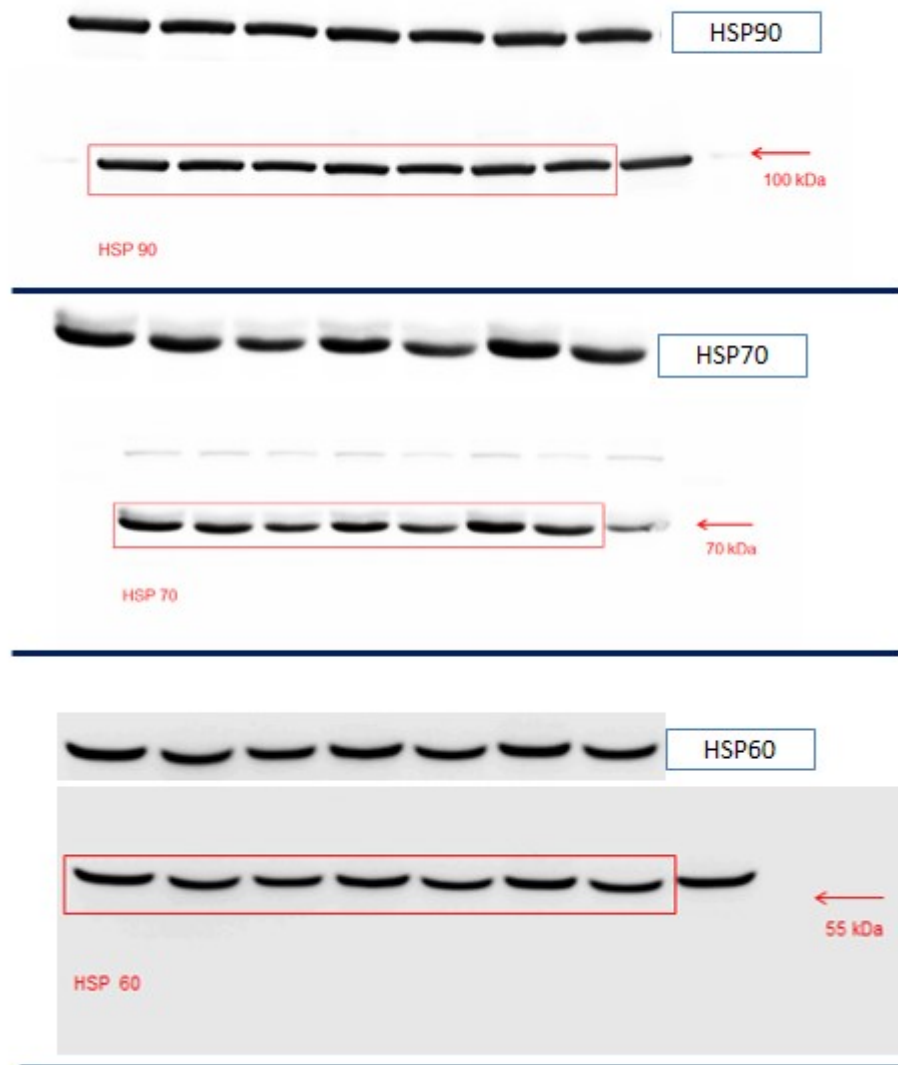



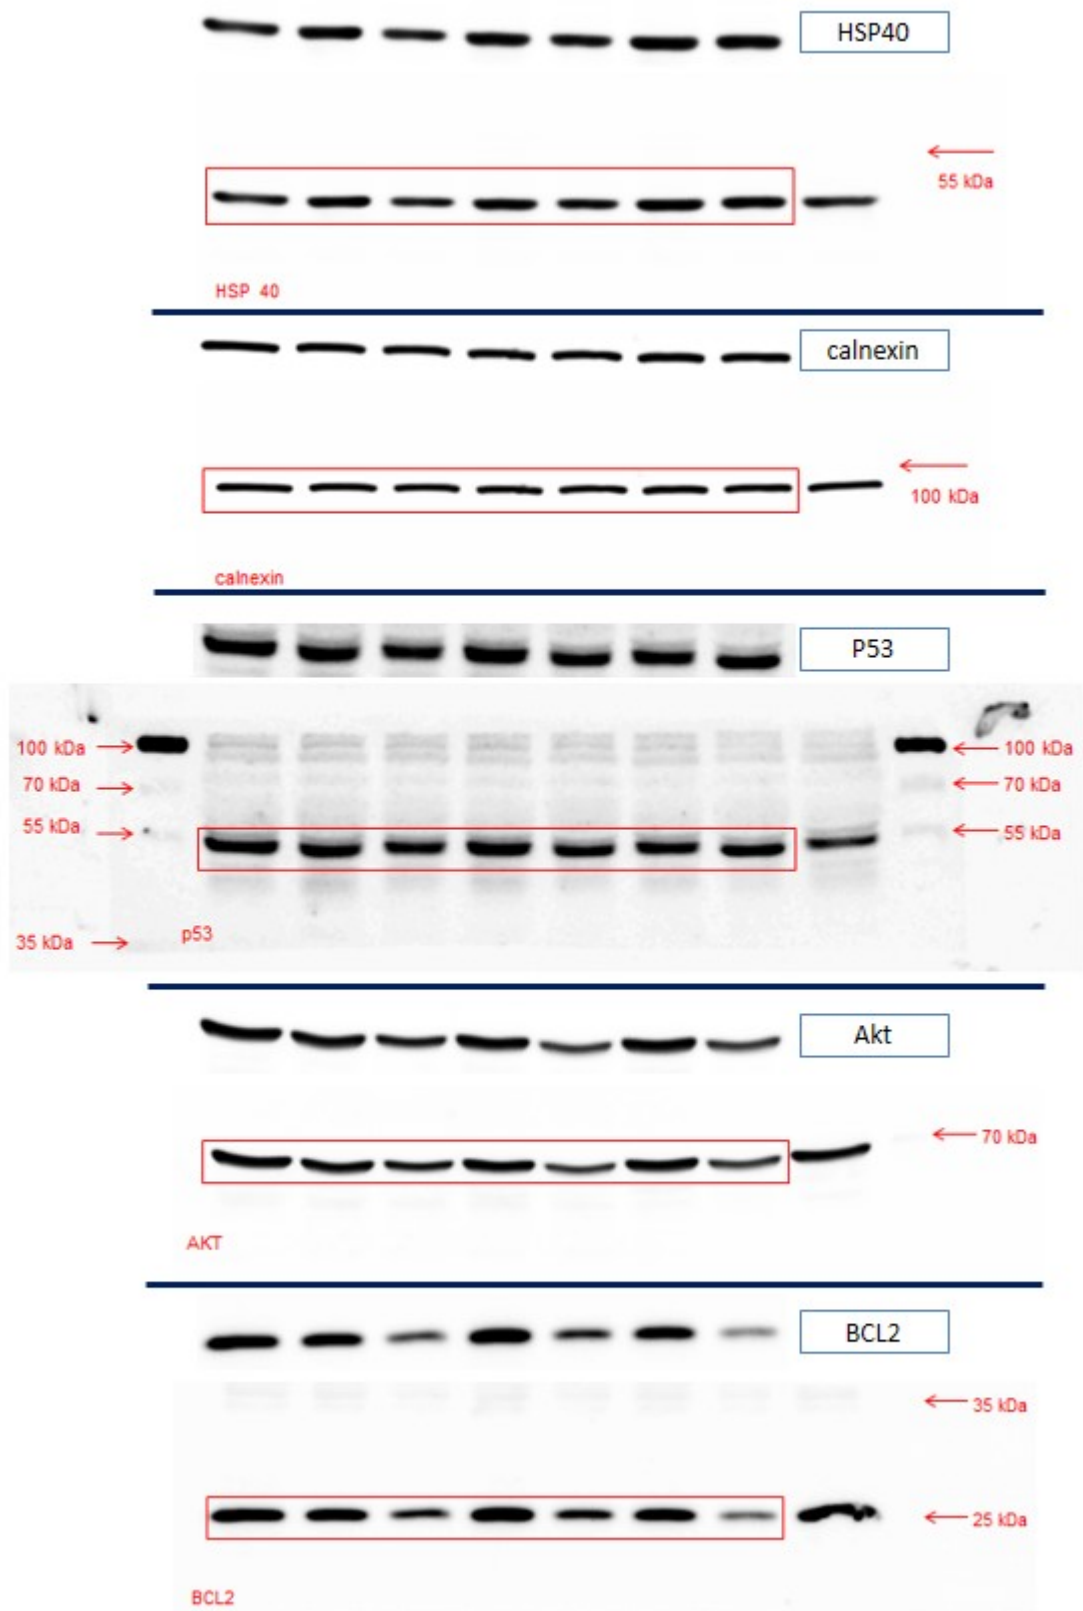

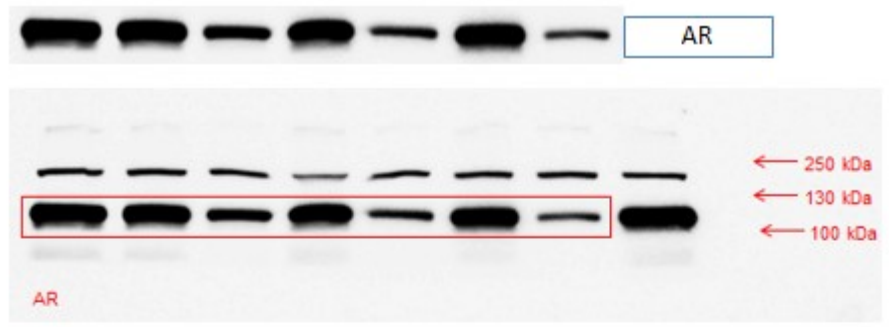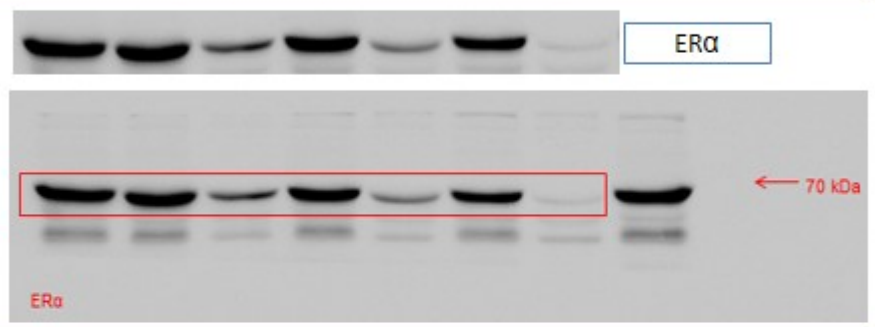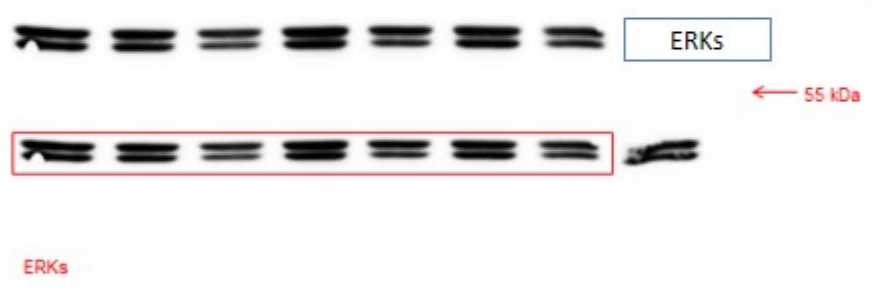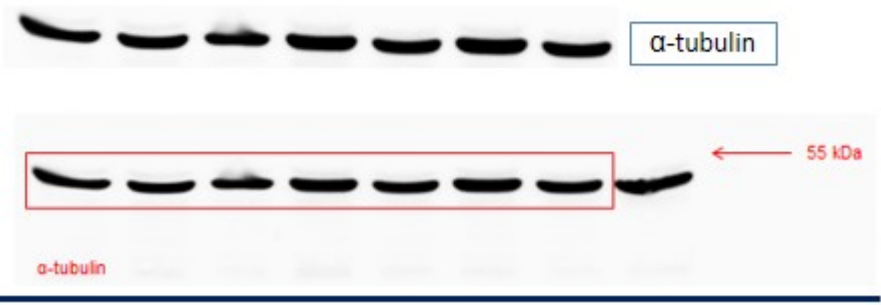

## References

1. A. A. Akhrem, F. A. Lakhvich, S. I. Budai, T. S. Khlebnicova and I. I. Petrusevich, *Synthesis*, 1978, **1978**, 925-927.
2. T. S. Khlebnikova, V. G. Isakova, A. V. Baranovskii, F. A. Lakhvich and A. S. Lyakhov, *Russian Journal of General Chemistry*, 2007, **77**, 1724-1731.
3. Y. Tamura, M. Inoue, A. Wada, M. Fujita and Y. Kita, *Chemical and Pharmaceutical Bulletin*, 1981, **29**, 3226-3231.
